# Supplementary material for: Thirty-day complications after laparoscopic or open cholecystectomy: a population-based cohort study in Italy
Source: PubMed Central journal article supplement — BMJ Open. 2013 Feb 12;3(2):e001943. doi: 10.1136/bmjopen-2012-001943 (PMC3586184; doi:10.1136/bmjopen-2012-001943), 2013-02-12
Supplement: bmjopen-2012-001943.draft_revisions.pdf [file bmjopen-2012-001943.draft_revisions.pdf]

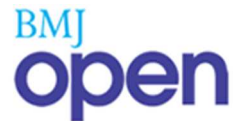

**The use of hospital discharge data to compare outcomes of different surgical techniques: the example of cholecystectomy.**

|                                 |                                                                                                                                                                                                                                                                                                                                                                                                         |
|---------------------------------|---------------------------------------------------------------------------------------------------------------------------------------------------------------------------------------------------------------------------------------------------------------------------------------------------------------------------------------------------------------------------------------------------------|
| Journal:                        | <i>BMJ Open</i>                                                                                                                                                                                                                                                                                                                                                                                         |
| Manuscript ID:                  | bmjopen-2012-001943                                                                                                                                                                                                                                                                                                                                                                                     |
| Article Type:                   | Research                                                                                                                                                                                                                                                                                                                                                                                                |
| Date Submitted by the Author:   | 09-Aug-2012                                                                                                                                                                                                                                                                                                                                                                                             |
| Complete List of Authors:       | Agabiti, Nera; Regional Health Service, Lazio, Epidemiology<br>Stafoggia, Massimo; Regional Health Service, Lazio, Epidemiology<br>Davoli, Marina; Regional Health Service, Lazio, Epidemiology<br>Fusco, Danilo; Regional Health Service, Lazio, Epidemiology<br>Barone, Anna; Regional Health Service, Lazio, Epidemiology<br>Perucci, Carlo; National Agency for Regional Health Services, Direction |
| <b>Primary Subject Heading</b>: | Epidemiology                                                                                                                                                                                                                                                                                                                                                                                            |
| Secondary Subject Heading:      | Evidence based practice, Health services research, Surgery, Gastroenterology and hepatology                                                                                                                                                                                                                                                                                                             |
| Keywords:                       | EPIDEMIOLOGY, Adverse events < THERAPEUTICS, QHepatobiliary surgery <uality in health care < HEALTH SERVICES ADMINISTRATION & MANAGEMENT, PUBLIC HEALTH, Clinical governance < HEALTH SERVICES ADMINISTRATION & MANAGEMENT, Health & safety < HEALTH SERVICES ADMINISTRATION & MANAGEMENT                                                                                                               |
|                                 |                                                                                                                                                                                                                                                                                                                                                                                                         |

SCHOLARONE™  
Manuscripts

1  
2  
3 **The use of hospital discharge data to compare outcomes of different surgical techniques:**  
4  
5 **the example of cholecystectomy.**  
6  
7

8  
9  
10 **Authors**

11 Nera Agabiti MD, Massimo Stafoggia MS, Marina Davoli MD PhD, Danilo Fusco MS, Anna  
12 Patrizia Barone MD and Carlo A.Perucci MD\*.  
13

14 Department of Epidemiology, Regional Health Service, Lazio Region, Rome, Italy  
15

16 \*National Agency for Regional Health Services, Rome, Italy  
17  
18  
19  
20  
21

22  
23 **Correspondence**

24 Dott.ssa Nera Agabiti

25 Department of Epidemiology, Regional Health Service, Lazio Region  
26

27 Via di S.Costanza 53  
28

29 00198 Rome (Italy)  
30

31 Tel 39-6-83060402  
32

33 Fax 39-6-83060374  
34

35 e:mail: [n.agabiti@deplazio.it](mailto:n.agabiti@deplazio.it)  
36  
37  
38  
39  
40  
41  
42

43 **Short running head:** Effectiveness of cholecystectomy  
44

45 **Word count for abstract:** 293  
46

47 **Word count for manuscript:** 2888  
48  
49  
50

51 This work was supported by the Regional Health Service, Lazio Region on the behalf of  
52 P.Re.Val.E. Regional Outcome Evaluation Program. Lazio Region (Italy)  
53

54 <http://www.epidemiologia.lazio.it/prevale11/>  
55  
56  
57  
58  
59  
60

1  
2  
3 **The use of hospital discharge data to compare outcomes of different surgical techniques:**  
4  
5 **the example of cholecystectomy.**  
6  
7

8  
9 **Abstract**  
10

11 **Objective**  
12

13  
14 There is an increasing interest in using routinely collected health data to support large-scale  
15 effectiveness evaluation of different treatment options. We evaluated short-term outcomes  
16 after laparoscopic cholecystectomy (LC) or open cholecystectomy (OC) in gallstones using  
17 hospital discharge data.  
18  
19  
20  
21

22 **Design**  
23

24 Population-based cohort study.  
25  
26

27 **Setting**  
28

29 Data were obtained from the Regional Hospital Discharge Registry Lazio Region in Central  
30 Italy (around 5 million inhabitants) in 2007-2008.  
31  
32  
33

34 **Participants**  
35

36 All patients admitted to hospitals of Lazio with symptomatic gallstones (ICD9-CM = 574)  
37 who underwent LC (ICD9-CM 51.23) or OC (ICD9-CM 51.22).  
38  
39  
40

41 **Outcome measures**  
42

43 1) “30-day surgical-related complications” defined as any complication of the biliary tract  
44 (including bile duct injury, bile leak, postoperative bleeding, wound infection, cholecystis  
45 injury); 2) “30-day systemic complications” defined as any complications of other organs  
46 (including sepsis, infections from other organs, major cardiovascular events and selected  
47 adverse events).  
48  
49  
50  
51  
52

53 **Results**  
54  
55  
56  
57  
58  
59  
60

1  
2  
3 13,651 patients were included; 86.1% had LC, 13.9% OC. 2.0% experienced surgical-related  
4  
5 complications (SRC), 2.1% systemic complications (SC). The Odds Ratio (OR) of  
6  
7 complications after LC versus OC was 0.60 ( $p<0.001$ ) for SRC and 0.52 ( $p<0.001$ ) for SC. As  
8  
9 regards SRC, the advantage of LC was consistent across age categories, severity of gallstones  
10  
11 and previous upper abdominal surgery, while there was no advantage among people with  
12  
13 emergency admission (OR=0.94,  $p = 0.764$ ). For SC, no significant advantage of LC was seen  
14  
15 among very old people (OR=0.99,  $p=0.975$ ) and among those with previous upper abdominal  
16  
17 surgery (OR=0.86,  $p=0.905$ ).  
18  
19

## 20 21 **Conclusions**

22  
23 This large observational study confirms that LC is more effective than OC with respect to  
24  
25 short-term complications. The advantage remains in sub-populations with higher preoperative  
26  
27 risk, but it is different according to whether the complications affect the biliary tract or other  
28  
29 organs or systems. Population-based linkage of administrative datasets can enlarge evidence  
30  
31 of treatment benefits in clinical practice.  
32  
33  
34  
35  
36  
37

38  
39 **Key words:** administrative data, cholecystectomy, complications, effectiveness, outcomes  
40  
41  
42  
43  
44  
45  
46  
47  
48  
49  
50  
51  
52  
53  
54  
55  
56  
57  
58  
59  
60

## Article summary

### Article focus

-The advantage of laparoscopic cholecystectomy (LC) approach for the treatment of gallstone versus open surgery (OC) has been shown from RCTs but the evidence from observational studies is limited.

-The use of linked administrative health records has become one of the most powerful tools in observational studies aimed at comparing treatments.

-We compared laparoscopic and open cholecystectomy in term of short-term outcomes using routinely collected databases in Lazio Region (Italy).

### Key messages

-This population-based study contributes to enlarge the evidence on effectiveness of LC in a real-life setting.

-As regards surgical-related complications, the advantage of LC was consistent across age categories, severity of gallstones and previous upper abdominal surgery, while there was no advantage among people with emergency admission.

-For systemic complications, no significant advantage of LC was seen among very old people and among those with previous upper abdominal surgery.

### Strengths and limitations

-Population-based design, large numbers and robustness of analytic procedures are the main strengths.

-It contributes to the debate on the complex methodology to estimated risk of adverse events after surgery using secondary databases to monitor quality of care.

1  
2  
3  
4  
5  
6  
7  
8  
9  
10  
11  
12  
13  
14  
15  
16  
17  
18  
19  
20  
21  
22  
23  
24  
25  
26  
27  
28  
29  
30  
31  
32  
33  
34  
35  
36  
37  
38  
39  
40  
41  
42  
43  
44  
45  
46  
47  
48  
49  
50  
51  
52  
53  
54  
55  
56  
57  
58  
59  
60

-The use of ICD-9-CM codes in the definition of severity of disease presentation and of complications is a major limit.

For peer review only

## Introduction

Comparative effectiveness research (CER) is becoming central to monitor real-life impact of treatments and support public health decisions (1, 2). Although the basic concept of comparing therapies is not new, over the last few years many initiatives have been implemented in many countries to provide large-scale evidence on benefits and harms of different treatments (3-5). The use of linked administrative health records has become one of the most powerful tools in observational studies aimed at comparing treatments (6,7). They include hospital in-patients records, birth and death registrations, outpatient care records, dispensed pharmacy drugs. Despite the advantages due to the large numbers and the population-level coverage, the analytic methods to reduce bias in CER studies are complex and new approaches are continuously developed (8,9).

In the Lazio Region (around 5.000.000 inhabitants) the P.Re.Val.E. Project (*Regional Program for Assessing the Outcomes of Health-care Interventions*) was launched in 2005. Its aims are: to measure the quality of health care provided in the Lazio Region, to describe variability of care provision across institutions and populations and to compare effectiveness of treatments for different medical and surgical conditions (10, 11). Over 60 outcomes indicators are calculated based on data obtained from record-linkage procedures of different health systems. The results are periodically updated and publicly disseminated with discussion on critical methodological points.

Cholecystectomy is one of the most common abdominal surgical procedures in developed countries. Since its introduction in the late '80s, laparoscopic cholecystectomy (LC) has replaced open cholecystectomy (OC) as the treatment of choice for symptomatic gallstones (12, 13). Although beneficial effects of LC have been widely demonstrated, there are

1  
2  
3 relatively few studies showing the advantages from real-life settings using secondary  
4  
5 databases (14-16). In the present study, we aimed at developing a methodology to measure  
6  
7 short-term complications after LC or OC using large administrative databases on behalf of the  
8  
9 P.Re.Val.E. Secondly, we tested the hypothesis that the advantages of LC versus OC could  
10  
11 vary according to demographic and clinical patients' characteristics.  
12  
13

## 20 **Methods**

### 21 Source of data

22  
23 Data was derived from the Lazio Hospital Information System (HIS), which provides  
24  
25 information on patients' demographic data (gender, age, place of birth, place of residence),  
26  
27 admission and discharge dates, discharge diagnoses (up to 6) and medical procedures or  
28  
29 surgical interventions ((up to 6) according to the International Classification of disease, Ninth  
30  
31 Revision, Clinical Modification (ICD-9-CM), status at discharge (alive, dead, transferred to  
32  
33 another hospital), ward(s) of stay, date(s) of in-hospital transfer, and a regional code  
34  
35 corresponding to the admitting facility for patients discharged from all public and private  
36  
37 hospital of the Lazio Region (5.759.839 inhabitants).  
38  
39  
40  
41  
42  
43  
44

### 45 Study population

46  
47 All hospital admissions with a primary or secondary diagnosis of gallstones (International  
48  
49 Classification of Diseases 9<sup>th</sup> Revision, Clinical Modification - ICD9-CM = 574) and a  
50  
51 procedure code of cholecystectomy (ICD9-CM 51.22, 51.23), occurred in private and public  
52  
53 hospitals of the Lazio Region between January 2007 and September 2008 were included, for a  
54  
55 total of 16,432 cases (age 18+ years). Information was retrieved from the HIS. In order to  
56  
57  
58  
59  
60



1  
2  
3 increase the case specificity, several exclusion criteria were applied including long-term  
4 hospitalizations, rehabilitations, day-hospitals, hospitalizations for delivery or trauma or  
5 cancer, hospitalizations with abdominal surgical procedures other than cholecystectomy. The  
6  
7 final population consisted of 13,651 subjects (**Figure 1**). See the online **Supplementary Data**  
8  
9 (Part 1) for details on the exclusion criteria and ICD9-CM codes.  
10  
11  
12

### 13 14 15 16 Patient-level risk factors

17  
18 The following characteristics were considered for each patient: Age (<70; 70-79; >=80 years  
19 old); Gender; Severity of gallstones: it was classified as *low* (not-complicated), *moderate*  
20 (presence of cholecystitis, cholangitis or biliary tract obstruction), and *high* (presence of both  
21 inflammation and obstruction of the biliary tract); Previous upper abdominal surgery (based  
22 on previous 2-year hospitalizations); Comorbidities (based on previous 2-year  
23 hospitalizations) following validated algorithms (17-19); Type of admission: either *elective* or  
24 *emergency*. See the online **Supplementary Data** (Part 2-4) for details on the ICD-9-CM  
25 codes. The choice of *cut off* for age category was based on previous studies to distinguish  
26 adult and old people (20-22).  
27  
28  
29  
30  
31  
32  
33  
34  
35  
36  
37

### 38 Outcomes

39  
40 We identified various complications within 30-days after the intervention and grouped them  
41 in two categories: 1) “*30-day surgical-related complications*” defined as any complication of  
42 the biliary tract (including bile duct injury, bile leak, postoperative bleeding, wound infection,  
43 cholecystitis injury); 2) “*30-day systemic complications*” defined as any complications of other  
44 organs (including sepsis, infections from other organs, major cardiovascular events and  
45 selected adverse events). The complete list of complications with ICD-9-CM codes is  
46 reported in the online **Supplementary Data** (Part 5). Among the various complications we  
47 included some conditions reported in the list of Patient Safety Indicators recently developed  
48  
49  
50  
51  
52  
53  
54  
55  
56  
57  
58  
59  
60

1  
2  
3 by the Agency for Health Care Research and Quality (i.e. postoperative bleeding, wound  
4 infection), while other items were specifically created on the basis of scientific literature on  
5 digestive surgery (14-16,23,24). Depending on the type of complication, some ICD9-CM  
6 codes were searched in both the index admission and the following ones in the 30-day period  
7 after the surgery, others were searched only in later hospitalizations. For example, peritonitis  
8 or acute pancreatitis was not counted as complications when reported in the index admission.  
9 See the online **Supplementary Data** (Part 5) for details on the ICD9-CM codes. In the case  
10 of a subsequent hospitalization occurred out of the study area (for example, in a region other  
11 than Lazio), we obtained information through record linkage procedure between hospital  
12 information systems. Because of the short follow up time, this happened in a minimal  
13 proportion of cases (0.1%). The outcome variables were: “30-day surgical-related  
14 complications” and “30-day systemic complications”; they were coded “1” if at least one of  
15 the complications within the group was present and “0” if none was recorded.  
16  
17  
18  
19  
20  
21  
22  
23  
24  
25  
26  
27  
28  
29  
30  
31  
32  
33

#### 34 Type of cholecystectomy

35  
36 We defined the variable “*type of cholecystectomy*” (laparoscopic cholecystectomy, LC vs.  
37 open cholecystectomy, OC). Since a specific ICD-9-code for a case converted from LC to OC  
38 was not available, in the case of reported ICD-9-CM codes for both LC and OC (5%), the  
39 patient was considered exposed to the open surgical procedure.  
40  
41  
42  
43  
44  
45  
46

#### 47 Statistical analysis

48  
49 Multiple logistic regression models were fitted to estimate the relative risk of 30-day  
50 complications (either “surgical-related” or “systemic”) after LC versus OC, adjusting for  
51 demographical and clinical risk factors. The two outcome variables were analysed separately.  
52  
53  
54  
55  
56 Given the large amount of individual-level variables available, the risk factors were divided in  
57  
58  
59  
60

1  
2  
3 two groups: 1) variables “a priori” chosen as confounders (age, gender, severity of gallstones,  
4 previous upper abdominal surgery, and type of admission); 2) variables empirically tested  
5 (comorbidities, which were selected using iterative stepwise statistical procedures) (9,25).  
6  
7  
8  
9  
10 Once the “best” predictive model was identified for each of the two outcome variables, the  
11 treatment variable “*type of cholecystectomy*” was included, and the adjusted odds ratio (OR)  
12 of LC versus open surgery was estimated, with corresponding 95% confidence interval (95%  
13 CI) and p-value.  
14  
15  
16  
17  
18  
19

20  
21 In order to test the hypothesis of an effect modification by age, relative risk estimates for the  
22 age groups were derived by adding an interaction term between the age group and the  
23 treatment variable in the final multivariate logistic model. We obtained the OR of  
24 laparoscopic vs. open surgery within each age stratum by adding the corresponding  
25 interaction terms coefficients. Similarly, effect modification was tested with regard to  
26 severity of cholelithiasis, previous upper abdominal surgery and type of admission. The  
27 corresponding tests of heterogeneity of the stratum-specific risk estimates were computed but  
28 not reported for ease of presentation.  
29  
30  
31  
32  
33  
34  
35  
36  
37  
38  
39

40 Sensitivity analyses were performed. First, in order to guarantee adequate control of  
41 confounding factors we identified and adjusted for all the individual factors associated with  
42 the treatment, within the propensity adjustment framework (26). This procedure is a two-step  
43 technique: 1. it estimates the a priori probability of exposure for each subject, based on  
44 clinical and demographic characteristics; 2. it standardizes for them in the association between  
45 treatment and the study outcome. The individual factors related to the exposure in the present  
46 study include age, gender, severity of cholelithiasis, previous upper abdominal surgery, type of  
47 admission, cardio-circulatory disease, cerebrovascular disease, COPD or respiratory failure,  
48  
49  
50  
51  
52  
53  
54  
55  
56  
57  
58  
59  
60

1  
2  
3 chronic nephropathy, chronic disease of the liver or pancreas. Second, to take into account the  
4 potential heterogeneous experience in laparoscopic surgery across different hospitals because  
5 of the patients' clustering within a single institution we perform a multilevel regression model  
6 with random intercepts for hospitals (27).  
7  
8  
9  
10

11  
12  
13  
14 All the statistical analyses were performed using SAS Software version 8.0 (SAS Institute,  
15 Inc. SAS/STAT software).  
16  
17  
18  
19  
20  
21  
22

## 23 **Results**

24  
25 A description of the study population, overall and by cholecystectomy procedure, is presented  
26 in **Table 1**. Over 80% of the patients were younger than 70 years, and moderate to high  
27 severity of the gallstones was diagnosed for 61.7%. As compared with patients undergoing  
28 LC, those who underwent OC were more likely to be elderly, males, with a more severe  
29 baseline disease and more chronic conditions. Furthermore, they were operated in emergency  
30 in most of the cases (52.4%), whereas LC was performed in elective hospitalizations much  
31 more frequently (73.9%).  
32  
33  
34  
35  
36  
37  
38  
39  
40  
41  
42

43 **Table 2** reports the relationship between demographic and clinical variables and the  
44 occurrence of complications. The adjusted risk of systemic complications increased with age  
45 and was much higher in patients with more severe baseline gallstones, whereas no clear age or  
46 severity-related differences in risk emerged with regard to surgical-related 30-day  
47 complications, once other co-factors were taken into account. Women were less likely to  
48 experience both types of complications. Having had a previous intervention on the upper  
49 digestive system seemed to enhance the risk of both surgical-related and systemic  
50  
51  
52  
53  
54  
55  
56  
57  
58  
59  
60

1  
2  
3 complications, though results are not statistically significant due to small power. Finally, the  
4  
5 risk of both types of complications was more evident in emergency as opposed to scheduled  
6  
7 interventions. Surgical-related complications were higher among subjects with obesity, blood  
8  
9 disease, stroke or chronic nephropathy, whereas systemic complications were associated with  
10  
11 blood diseases, ischemic heart disease, conduction disorders or dysrhythmias, COPD or  
12  
13 respiratory failure, chronic nephropathy, and chronic diseases of the liver or pancreas.  
14  
15

16  
17  
18 **Table 3** shows the relationship between type of cholecystectomy and outcomes, adjusted for  
19  
20 the risk factors identified in Table 2. We report results of the advantage of LC vs. OC (OR,  
21  
22 95% CI) in the cohort (first lines of the table) and in the each stratum of the variables tested in  
23  
24 the models with interaction terms. The incidence of “30-day surgical-related complications”  
25  
26 and “30-day systemic complications” was 2.0% and 2.1%, respectively. The incidence of “at  
27  
28 least one 30-day complication” was 3%. The odds ratio of surgical related complications for  
29  
30 patients who underwent LC as compared to patients with OC was 0.60 ( $p < 0.001$ ). The  
31  
32 corresponding figure for systemic complications was 0.52 ( $p < 0.001$ ).  
33  
34

35  
36 As regards 30-day surgical-related complications, the protective effect of LC vs. OC was  
37  
38 consistent across the age category, severity of cholelithiasis and previous upper abdominal  
39  
40 surgery, while among people with emergency admission there was no advantage (OR=0.94  $p$   
41  
42 = 0.764). Similarly, for systemic complications, the superiority of LC vs. OC was consistent  
43  
44 regardless level of cholelithiasis severity, and elective/emergency admission, but for those  
45  
46 80+ yrs aged people there was no advantage of LC vs. OC (OR 0.99,  $p = 0.975$ ); also for  
47  
48 patients with previous upper abdominal surgery there was a much weaker advantage  
49  
50 (OR=0.86,  $p=0.905$ ).  
51  
52  
53  
54  
55  
56  
57  
58  
59  
60

1  
2  
3 When the association between type of cholecystectomy and short-term complications was  
4  
5 adjusted with the propensity adjustment method, results were consistent with those obtained  
6  
7 with the risk-adjustment procedure (LC vs. OC OR= 0.61 and OR=0.52 respectively for the  
8  
9 two outcomes). Finally, results were similar taking into account patients' clustering within  
10  
11 different hospitals (*data not shown*).  
12  
13

### 14 15 16 17 18 **Discussion** 19

20 From this large observational study based on linked administrative health records - taking  
21  
22 into account the disomogeneous distribution of factors related to the probability to be offered  
23  
24 open surgery - people who end up having a LC have a better short-term prognosis than those  
25  
26 that get an OC for the treatment of gallstones. The superiority of laparoscopic approach in  
27  
28 term of short-term outcomes is consistent in both genders, different severity in disease  
29  
30 presentation and past history of upper abdominal surgery.  
31  
32  
33  
34  
35

36 This population-based study contributes to enlarge the evidence on effectiveness of LC in a  
37  
38 real-life setting. It supports the usefulness of observational approaches. To our knowledge it is  
39  
40 the first study in Italy to measure and compare outcomes of surgical treatments using data  
41  
42 from secondary data sources. Despite RTCs are considered the optimal study design when  
43  
44 comparing efficacy of treatments, observational studies provide a picture of treatment under  
45  
46 usual circumstances of health-care practice and can answer to the question “*Does it work in*  
47  
48 *practice?*” (6, 3). RTCs often have small sample size and may under represent vulnerable  
49  
50 patient groups, including elderly patients with multiple comorbidities, children, and young  
51  
52 women, and operate in a highly controlled environment that is far from routine clinical  
53  
54 practice. Our study supports that LC is a reliable approach safer than OC not only in old age  
55  
56  
57  
58  
59  
60

1  
2  
3 group - confirming previous findings (20, 28) - but also in presence of severe disease  
4 presentation and in patients with past history of upper digestive system surgery. Beneficial  
5 effect of LC as regards systemic complications tends to be lower in 80+ yrs aged in  
6 comparison with younger ages, and in patients with emergency admission in comparison to  
7 elective admissions as regards 30-day surgical-related complications. These data add to the  
8 evidence on the complex relationship between age and outcomes after surgery (20-22, 28).  
9  
10  
11  
12  
13  
14  
15  
16  
17

18 A number of potential biases are present. First of all, people in the two groups of patients  
19 analyzed are not homogenous with a higher frequency of elderly and more severe patients in  
20 the open group than in the laparoscopic one. When comparing the effect of the two techniques  
21 using two different populations, the so called “indication bias” may affect study validity (6,  
22 29). To limit this problem we run the propensity adjustment analysis to take into account the  
23 different distribution of factors strongly associated with the probability to receive open  
24 surgery in the study population. This analytical approach confirmed the advantage of  
25 laparoscopic vs. open surgery obtained in the main logistic regression analysis. Another  
26 critical point is the potential different distribution of laparoscopic experience across surgeons;  
27 however a sensitivity analysis which took into account this point led to similar results. The  
28 use of ICD-9-CM codes in the definition of severity of disease presentation and of  
29 complications is another major limit. Discharge abstract data have little insight into clinical  
30 details and do not inform on the temporal relationship of the clinical conditions and processes,  
31 then defining complications is a difficult task (30). In this respect, we tried to improve the  
32 accuracy of our measures both 1) applying a specific coding algorithm with subsequent  
33 hospital admissions used to retrieve adverse events and 2) excluding in the “count” of  
34 complications specific items if reported in the index only (i.e. peritonitis) because of the  
35 difficulty to determine if it was already present at admission. Moreover, we cannot exclude an  
36  
37  
38  
39  
40  
41  
42  
43  
44  
45  
46  
47  
48  
49  
50  
51  
52  
53  
54  
55  
56  
57  
58  
59  
60

1  
2  
3 under-notification of complications but it is unlikely that is influenced by the type of surgery.  
4  
5 Another major problem is the potential misclassification of exposure since we were not able  
6  
7 to measure the occurrence of conversion of LC to OC. The number of people that were  
8  
9 switched from LC to OP is low in comparison to figures documented in other studies and it  
10  
11 may represent a severe source of bias in our study (28,31).  
12  
13

14  
15  
16 Beneficial effects of the laparoscopic approach versus traditional open surgery for the  
17  
18 treatment of gallstones come from various randomized controlled trials (RCTs) (32). They  
19  
20 found significant shorter hospital stay and quicker convalescence associated with LC but no  
21  
22 differences in mortality, complications and operative time between the two procedures. A  
23  
24 better trend with the laparoscopic approach, including morbidity and mortality, comes from  
25  
26 some observational studies. From a surveillance system in eight Swiss hospitals, surgical site  
27  
28 infections were less common in laparoscopic approach in comparison to traditional open  
29  
30 surgery (0.5% in LC vs. 1.8% in OC) (33). Significantly lower incidence of venous  
31  
32 thromboembolism and surgical site-infections in laparoscopic cases versus open cases was  
33  
34 recently observed in a large administrative dataset-based study in USA (14, 15). In-hospital  
35  
36 mortality after cholecystectomy over a ten-years period was studied in USA: LC was  
37  
38 associated with a low mortality rate (mean value in the period: 0.52%) while OC with a  
39  
40 significantly higher rate (corresponding value: 4.9%) (16). In the era of evidence-based  
41  
42 health care, population-based linkage of administrative health data have been increasingly  
43  
44 used also in the field of surgery. However the methodology is not standardized and estimated  
45  
46 risk of adverse events vary widely according to the type of interventions and to the type of  
47  
48 complications and their operative definition. As a recent example in Europe, the incidence of  
49  
50 conversion to OC after LC in all hospitals in England from 2005 to 2006 has been examined  
51  
52 using Hospital Episode Statistics and resulted 4.6% for elective procedures and 9.4% for  
53  
54  
55  
56  
57  
58  
59  
60



1  
2  
3 emergency procedures) (34). In USA, a set of indicators (Patient Safety Indicators (PSIs) has  
4  
5 been introduced, validated and continuously under revision as algorithms based on the  
6  
7 International Classification of Diseases, Ninth Revision, Clinical Modification (17). Our  
8  
9 study contributes to the experience in using population-based linked health data and ICD-9-  
10  
11 CM coding algorithms to compare treatment outcomes.  
12

13  
14  
15  
16 Population-based linkage of routinely collected health data represents a precious tool to  
17  
18 support large- scale and real-world practice evaluation by measuring specific outcomes and  
19  
20 comparing them over time and across populations. Together with results from experimental  
21  
22 research settings, the conclusions of research studies evaluating clinical outcomes through  
23  
24 data linkage systems should be successfully incorporated into practice by clinicians/surgeons.  
25  
26  
27  
28  
29  
30  
31  
32  
33  
34  
35  
36  
37  
38  
39  
40  
41  
42  
43  
44  
45  
46  
47  
48  
49  
50  
51  
52  
53  
54  
55  
56  
57  
58  
59  
60

## ACKNOWLEDGMENTS

We are very grateful to Roberta Macci and Sandra Magliolo for their support in finding the cited articles and to Anna Kohn (Azienda Ospedaliera S.Camillo, Rome Italy) for her precious comments.

For peer review only

## FUNDING

This work was supported by the Regional Health Service, Lazio Region on the behalf of *P.Re.Val.E. Regional Outcome Evaluation Program. Lazio Region (Italy)*

<http://www.epidemiologia.lazio.it/prevale11/>

## AUTHOR'S CONTRIBUTION

All Authors participated in the study design, in defining the study protocol and methodology, in acquisition of data, in planning the analyses, in interpreting the results. M.S. performed the analyses. N.A and M.S. drafted the manuscript.

## COMPETING INTERESTS STATEMENT

There is no competing interest.

## DATA SHARING STATEMENT

We state that our work is an original research.

## REFERENCES

1. Madigan D, Ryan P. What can we really learn from observational studies?: the need for empirical assessment of methodology for active drug safety surveillance and comparative effectiveness research. *Epidemiology* 2011; 22: 629-31.

2. Mullins CD, Abdulhalim AM, Lavallee DC. Continuous patient engagement in comparative effectiveness research. *JAMA* 2012; 307:1587-8.

3. Agency for Health Care Research and Quality (AHRQ) – Effective Health Care Program.

[www.effectivehealthcare.ahrq.gov](http://www.effectivehealthcare.ahrq.gov)

- 1  
2  
3  
4  
5 4. Fink AS, Campbell DA Jr, Mentzer RM Jr et al. The National Surgical Quality  
6 Improvement Program in non-veterans administration hospitals: initial demonstration of  
7 feasibility. *Ann Surg* 2002 ; 236: 344-53; discussion 353-4.  
8  
9
- 10  
11  
12  
13  
14 5. Fleetcroft R, Steel N, Cookson R et al. Incentive payments are not related to expected  
15 health gain in the pay for performance scheme for UK primary care: cross-sectional analysis.  
16 *BMC Health Serv Res* 2012; 12:94.  
17  
18  
19
- 20  
21  
22  
23 6. Schneeweiss S. Developments in post-marketing comparative effectiveness research.  
24 *Clin Pharmacol Ther* 2007; 82:143-56. Epub 2007 Jun 6. Review.  
25  
26  
27
- 28  
29  
30 7. Hall SE, Holman CD, Finn J et al. Improving the evidence base for promoting quality and  
31 equity of surgical care using population-based linkage of administrative health records. *Int J*  
32 *Qual Health Care* 2005; 17: 415-420. Epub 2005 May 9. Review.  
33  
34  
35  
36
- 37  
38  
39 8. Hanley JA, Dendukuri N. Efficient sampling approaches to address confounding in  
40 database studies. *Stat Methods Med Res.* 2009 Feb;18(1):81-105. Epub 2008 Sep 24. Review.  
41  
42  
43  
44
- 45 9. Kansagara D, Englander H, Salanitro A et al. Risk prediction models for hospital  
46 readmission: a systematic review. *JAMA* 2011 19; 306:1688-98.  
47  
48  
49
- 50  
51  
52 10. Fusco D, Barone AP, Sorge C et al. P.Re.Val.E.: Outcome research program for the  
53 evaluation of health care quality in Lazio, Italy. *BMC Health Serv Res* 2012 27; 12:25.  
54  
55  
56  
57  
58  
59  
60

- 1  
2  
3  
4  
5  
6  
7  
8  
9  
10  
11  
12  
13  
14  
15  
16  
17  
18  
19  
20  
21  
22  
23  
24  
25  
26  
27  
28  
29  
30  
31  
32  
33  
34  
35  
36  
37  
38  
39  
40  
41  
42  
43  
44  
45  
46  
47  
48  
49  
50  
51  
52  
53  
54  
55  
56  
57  
58  
59  
60
11. Pinnarelli L, Nuti S, Sorge C, et al. What drives hospital performance? The impact of comparative outcome evaluation of patients admitted for hip fracture in two Italian regions. *BMJ Qual Saf* 2012; 21: 127-34. Epub 2011 Oct 19.
  12. Keulemans YC, Venneman NG, Gouma DJ et al. New strategies for the treatment of gallstone disease. *Scand J Gastroenterol Suppl* 2002; 236:87-90. Review.
  13. Williams EJ, Green J, Beckingham I et al. British Society of Gastroenterology - Guidelines on the management of common bile duct stones (CBDS). *Gut* 2008; 57:1004-21. Epub 2008 Mar 5. Review.
  14. Varela JE, Wilson SE, Nguyen NT. Laparoscopic surgery significantly reduces surgical-site infections compared with open surgery. *Surg Endosc* 2010; 24: 270-276. Epub 2009 Jun 17.
  15. Nguyen NT, Hinojosa MW, Fayad C et al. Laparoscopic surgery is associated with a lower incidence of venous thromboembolism compared with open surgery. *Ann Surg* 2007; 246:1021-1027.
  16. Dolan JP, Diggs BS, Sheppard BC et al. The national mortality burden and significant factors associated with open and laparoscopic cholecystectomy: 1997-2006. *J Gastrointest Surg* 2009; 13:2292-2301. Epub 2009 Sep 2.
  17. Quan H, Sundararajan V, Halfon P et al. Coding algorithms for defining comorbidities in ICD-9-CM and ICD-10 administrative data. *Med Care*; 2005;43:1130-9.

- 1  
2  
3  
4  
5 18. Agabiti N, Picciotto S, Cesaroni G et al. The influence of socioeconomic status on  
6 utilization and outcomes of elective total hip replacement: a multicity population-based  
7 longitudinal study. *Int J Qual Health Care*. 2007;19:37-44.  
8  
9  
10  
11  
12  
13  
14 19. Armitage JN, van der Meulen JH - Royal College of Surgeons Co-morbidity Consensus  
15 Group. Identifying co-morbidity in surgical patients using administrative data with the Royal  
16 College of Surgeons Charlson Score. *Br J Surg* 2010; 97:772-781.  
17  
18  
19  
20  
21  
22  
23 20. Yetkin G, Uludag M, Oba S et al. Laparoscopic cholecystectomy in elderly patients. *JSL*  
24 *2009*; 13:587-591.  
25  
26  
27  
28  
29  
30 21. Russ AJ, Obma KL, Rajamanickam V et al. Laparoscopy Improves Short-term Outcomes  
31 After Surgery for Diverticular Disease. *Gastroenterology* 2010 Feb 26. [Epub ahead of print]  
32  
33  
34  
35  
36 22. Pessaux P, Tuech JJ, Derouet N et al. Laparoscopic cholecystectomy in the elderly: a  
37 prospective study. *Surg Endosc*. 2000 Nov;14(11):1067-9.  
38  
39  
40  
41  
42  
43 23. Kaafarani HM, Rosen AK. Using administrative data to identify surgical adverse events:  
44 an introduction to the Patient Safety Indicators. *Am J Surg* 2009; 198(5 Suppl):S63-S68  
45  
46  
47  
48  
49 24. Jhung MA, Banerjee SN. Administrative coding data and health care-associated  
50 infections. *Clin Infect Dis* 2009; 49:949-955. Review  
51  
52  
53  
54  
55  
56 25 Arcà M, Fusco D, Barone AP et al. Risk adjustment and outcome research. Part I.  
57  
58  
59  
60

1  
2  
3 J Cardiovasc Med (Hagerstown). 2006 Sep;7(9):682-90.  
4  
5

6  
7 26. D'Agostino RB. Tutorials in biostatistics. Propensity score methods for bias reduction in  
8 the comparison of a treatment to a non-randomized control group. Statist Med 1998; 17:2265-  
9 2281  
10  
11

12  
13  
14  
15  
16 27. Harvey Goldstein. Multilevel statistical models. 3rd Edition. 2003.  
17 Oxford University Press Inc., New York, NY10016  
18  
19

20  
21  
22  
23 28. Kim HO, Yun JW, Shin JH et al. Outcome of laparoscopic cholecystectomy is not  
24 influenced by chronological age in the elderly. World J Gastroenterol 2009; 15:722-726.  
25  
26

27  
28  
29 29. Rothman KJ, Lash TL, Greenland S. Modern Epidemiology 3<sup>rd</sup> edition, Publisher:  
30 Lippincott Williams & Wilkins, 2008  
31  
32

33  
34  
35  
36 30. Glance LG, Dick AW, Osler TM et al. Accuracy of hospital report cards based on  
37 administrative data. Health Serv Res 2006; 41(4 Pt 1):1413-1437  
38  
39

40  
41  
42 31. Shamiyeh A, Danis J, Wayand W et al. 14-year analysis of laparoscopic  
43 cholecystectomy: conversion--when and why? Surg Laparosc Endosc Percutan Tech. 2007  
44 Aug;17(4):271-6.  
45  
46  
47  
48

49  
50  
51 32. Keus F, Gooszen HG, van Laarhoven CJ. Open, small-incision, or laparoscopic  
52 cholecystectomy for patients with symptomatic cholelithiasis. An overview of Cochrane  
53 Hepato-Biliary Group reviews. Cochrane Database Syst Rev 2010; (1):CD008318.  
54  
55  
56  
57  
58  
59  
60

1  
2  
3  
4  
5 33. Romy S, Eisenring MC, Bettschart V et al. Laparoscope use and surgical site infections in  
6 digestive surgery. *Ann Surg* 2008; 247:627-632.  
7  
8

9  
10  
11 34. Ballal M, David G, Willmott S, Corless DJ et al. Conversion after laparoscopic  
12 cholecystectomy in England. *Surg Endosc* 2009; 23:2338-2344. Epub 2009 Mar 6.  
13  
14  
15  
16  
17  
18  
19  
20  
21  
22  
23  
24  
25  
26  
27  
28  
29  
30  
31  
32  
33  
34  
35  
36  
37  
38  
39  
40  
41  
42  
43  
44  
45  
46  
47  
48  
49  
50  
51  
52  
53  
54  
55  
56  
57  
58  
59  
60



**Table 1.** Study population, overall and by cholecystectomy procedure: distribution by age, gender, severity of cholelithiasis, previous upper abdominal surgery, type of admission, comorbidities - Lazio Region, Italy, January 2007-September 2008

| Patient characteristics                   | Laparoscopic cholecystectomy             |             | Open cholecystectomy |             | Total         |              |      |
|-------------------------------------------|------------------------------------------|-------------|----------------------|-------------|---------------|--------------|------|
|                                           | No.                                      | %           | No.                  | %           | No.           | %            |      |
| <b>Total</b>                              | <b>11.752</b>                            | <b>86,1</b> | <b>1.899</b>         | <b>13,9</b> | <b>13.651</b> | <b>100,0</b> |      |
| Age (years)                               |                                          |             |                      |             |               |              |      |
|                                           | < 70                                     | 9.913       | 84,4                 | 1.162       | 61,2          | 11.075       | 81,1 |
|                                           | 70 - 79                                  | 1.543       | 13,1                 | 485         | 25,5          | 2.028        | 14,9 |
|                                           | ≥ 80                                     | 296         | 2,5                  | 252         | 13,3          | 548          | 4,0  |
| Gender                                    |                                          |             |                      |             |               |              |      |
|                                           | Men                                      | 4.349       | 37,0                 | 979         | 51,6          | 5.328        | 39,0 |
|                                           | Women                                    | 7.403       | 63,0                 | 920         | 48,4          | 8.323        | 61,0 |
| Severity of cholelithiasis                |                                          |             |                      |             |               |              |      |
|                                           | Low                                      | 4.767       | 40,6                 | 470         | 24,7          | 5.237        | 38,4 |
|                                           | Moderate                                 | 6.473       | 55,1                 | 1.210       | 63,7          | 7.683        | 56,3 |
|                                           | High                                     | 512         | 4,4                  | 219         | 11,5          | 731          | 5,4  |
| Previous upper abdominal surgery          |                                          |             |                      |             |               |              |      |
|                                           | No                                       | 11.714      | 99,7                 | 1.867       | 98,3          | 13.581       | 99,5 |
|                                           | Yes                                      | 38          | 0,3                  | 32          | 1,7           | 70           | 0,5  |
| Type of admission                         |                                          |             |                      |             |               |              |      |
|                                           | Elective                                 | 8.690       | 73,9                 | 903         | 47,6          | 9.593        | 70,3 |
|                                           | Emergency                                | 3.062       | 26,1                 | 996         | 52,4          | 4.058        | 29,7 |
| Comorbidities (presence of the condition) |                                          |             |                      |             |               |              |      |
|                                           | Cancer                                   | 232         | 2,0                  | 75          | 3,9           | 307          | 2,2  |
|                                           | Diabetes                                 | 268         | 2,3                  | 100         | 5,3           | 368          | 2,7  |
|                                           | Obesity                                  | 115         | 1,0                  | 25          | 1,3           | 140          | 1,0  |
|                                           | Blood disease                            | 146         | 1,2                  | 62          | 3,3           | 208          | 1,5  |
|                                           | Hypertension                             | 842         | 7,2                  | 247         | 13,0          | 1.089        | 8,0  |
|                                           | Ischemic heart disease                   | 246         | 2,1                  | 107         | 5,6           | 353          | 2,6  |
|                                           | Past coronary revascularization          | 63          | 0,5                  | 22          | 1,2           | 85           | 0,6  |
|                                           | Heart failure                            | 47          | 0,4                  | 41          | 2,2           | 88           | 0,6  |
|                                           | Other heart disease                      | 158         | 1,3                  | 76          | 4,0           | 234          | 1,7  |
|                                           | Conduction disorder or dysrhythmia       | 250         | 2,1                  | 95          | 5,0           | 345          | 2,5  |
|                                           | Cerebrovascular disease                  | 146         | 1,2                  | 74          | 3,9           | 220          | 1,6  |
|                                           | Vascular disease                         | 91          | 0,8                  | 38          | 2,0           | 129          | 0,9  |
|                                           | COPD or respiratory failure              | 189         | 1,6                  | 84          | 4,4           | 273          | 2,0  |
|                                           | Chronic nephropathy                      | 68          | 0,6                  | 46          | 2,4           | 114          | 0,8  |
|                                           | Chronic disease of the liver or pancreas | 219         | 1,9                  | 70          | 3,7           | 289          | 2,1  |

Table 2. Factors related to the incidence of 30-day complications after cholecystectomy. OR crude and adjusted, p-values - Lazio Region, Italy, January 2007-September 2008 (N = 13,651)

| Patient characteristics                   | 30-day surgical-related complications (N=278, 2.0%) |                     |      |                   |      | 30-day systemic complications (N=280, 2.1%) |                     |      |                   |      |       |
|-------------------------------------------|-----------------------------------------------------|---------------------|------|-------------------|------|---------------------------------------------|---------------------|------|-------------------|------|-------|
|                                           | %                                                   | OR <sub>crude</sub> | p    | OR <sub>adj</sub> | p    | %                                           | OR <sub>crude</sub> | p    | OR <sub>adj</sub> | p    |       |
| Age (years)                               |                                                     |                     |      |                   |      |                                             |                     |      |                   |      |       |
|                                           | < 70                                                | 1,8                 | 1,00 | -                 | 1,00 | -                                           | 1,5                 | 1,00 | -                 | 1,00 | -     |
|                                           | 70 - 79                                             | 2,9                 | 1,62 | 0,001             | 1,36 | 0,048                                       | 3,9                 | 2,68 | 0,000             | 2,01 | 0,000 |
|                                           | ≥ 80                                                | 3,3                 | 1,84 | 0,015             | 1,21 | 0,475                                       | 7,1                 | 5,13 | 0,000             | 2,79 | 0,000 |
| Gender                                    |                                                     |                     |      |                   |      |                                             |                     |      |                   |      |       |
|                                           | Men                                                 | 2,5                 | 1,00 | -                 | 1,00 | -                                           | 2,6                 | 1,00 | -                 | 1,00 | -     |
|                                           | Women                                               | 1,7                 | 0,69 | 0,002             | 0,75 | 0,022                                       | 1,7                 | 0,66 | 0,001             | 0,80 | 0,070 |
| Severity of cholelithiasis                |                                                     |                     |      |                   |      |                                             |                     |      |                   |      |       |
|                                           | Low                                                 | 1,9                 | 1,00 | -                 | 1,00 | -                                           | 1,2                 | 1,00 | -                 | 1,00 | -     |
|                                           | Moderate                                            | 2,0                 | 1,08 | 0,538             | 0,96 | 0,733                                       | 2,2                 | 1,84 | 0,000             | 1,55 | 0,004 |
|                                           | High                                                | 3,7                 | 2,03 | 0,001             | 1,43 | 0,122                                       | 6,2                 | 5,30 | 0,000             | 3,40 | 0,000 |
| Previous upper abdominal surgery          |                                                     |                     |      |                   |      |                                             |                     |      |                   |      |       |
|                                           | No                                                  | 2,0                 | 1,00 | -                 | 1,00 | -                                           | 2,0                 | 1,00 | -                 | 1,00 | -     |
|                                           | Yes                                                 | 5,7                 | 2,94 | 0,037             | 2,29 | 0,119                                       | 4,3                 | 2,15 | 0,197             | 1,72 | 0,376 |
| Type of admission                         |                                                     |                     |      |                   |      |                                             |                     |      |                   |      |       |
|                                           | Elective                                            | 1,6                 | 1,00 | -                 | 1,00 | -                                           | 1,5                 | 1,00 | -                 | 1,00 | -     |
|                                           | Emergency                                           | 3,0                 | 1,85 | 0,000             | 1,66 | 0,000                                       | 3,4                 | 2,34 | 0,000             | 1,64 | 0,000 |
| Comorbidities (presence of the condition) |                                                     |                     |      |                   |      |                                             |                     |      |                   |      |       |
|                                           | Cancer                                              | 2,6                 | 1,30 | 0,476             | -    | -                                           | 3,6                 | 1,81 | 0,059             | -    | -     |
|                                           | Diabetes                                            | 3,3                 | 1,65 | 0,095             | -    | -                                           | 4,4                 | 2,24 | 0,002             | -    | -     |
|                                           | Obesity                                             | 5,0                 | 2,57 | 0,016             | 2,35 | 0,034                                       | 4,3                 | 2,16 | 0,067             | -    | -     |
|                                           | Blood disease                                       | 5,8                 | 3,03 | 0,000             | 2,09 | 0,022                                       | 7,7                 | 4,16 | 0,000             | 1,96 | 0,024 |
|                                           | Hypertension                                        | 2,9                 | 1,46 | 0,050             | -    | -                                           | 4,0                 | 2,20 | 0,000             | -    | -     |
|                                           | Ischemic heart disease                              | 2,8                 | 1,42 | 0,286             | -    | -                                           | 7,4                 | 4,08 | 0,000             | 1,74 | 0,020 |
|                                           | Past coronary revascularization                     | 2,4                 | 1,16 | 0,836             | -    | -                                           | 9,4                 | 5,08 | 0,000             | -    | -     |
|                                           | Heart failure                                       | 2,3                 | 1,12 | 0,875             | -    | -                                           | 4,6                 | 2,29 | 0,107             | -    | -     |
|                                           | Other heart disease                                 | 3,4                 | 1,72 | 0,136             | -    | -                                           | 6,8                 | 3,66 | 0,000             | -    | -     |
|                                           | Conduction disorder or dysrhythmia                  | 4,1                 | 2,09 | 0,008             | -    | -                                           | 7,0                 | 3,81 | 0,000             | 1,73 | 0,025 |
|                                           | Cerebrovascular disease                             | 5,9                 | 3,12 | 0,000             | 1,98 | 0,025                                       | 7,7                 | 4,19 | 0,000             | -    | -     |
|                                           | Vascular disease                                    | 0,8                 | 0,37 | 0,328             | -    | -                                           | 8,5                 | 4,59 | 0,000             | -    | -     |
|                                           | COPD or respiratory failure                         | 2,6                 | 1,27 | 0,534             | -    | -                                           | 7,7                 | 4,22 | 0,000             | 2,02 | 0,006 |
|                                           | Chronic nephropathy                                 | 9,7                 | 5,31 | 0,000             | 3,24 | 0,001                                       | 10,5                | 5,82 | 0,000             | 2,27 | 0,018 |
|                                           | Chronic disease of the liver or pancreas            | 3,5                 | 1,75 | 0,087             | -    | -                                           | 4,8                 | 2,51 | 0,001             | 1,97 | 0,020 |

**Table 3.** Association between type of cholecystectomy and 30-day complications: OR and p-values from crude model, risk-adjusted model, and models with interaction with age group, severity of cholelithiasis, previous upper abdominal surgery and type of admission - Lazio Region, Italy, January 2007 - September 2008

|                                            | 30-day surgical-related complications<br>(N=278, %=2.0) |                     |       |                   |       | 30-day systemic complications<br>(N=280, %=2.1) |                     |       |                   |       |
|--------------------------------------------|---------------------------------------------------------|---------------------|-------|-------------------|-------|-------------------------------------------------|---------------------|-------|-------------------|-------|
|                                            | %                                                       | OR <sub>crude</sub> | p     | OR <sub>adj</sub> | p     | %                                               | OR <sub>crude</sub> | p     | OR <sub>adj</sub> | p     |
| Open cholecystectomy                       | 3,9                                                     | 1,00                | -     | 1,00              | -     | 5,2                                             | 1,00                | -     | 1,00              | -     |
| Laparoscopic cholecystectomy               | 1,7                                                     | 0,44                | 0,000 | 0,60              | 0,001 | 1,6                                             | 0,29                | 0,000 | 0,52              | 0,000 |
| <i>Stratified results by each category</i> |                                                         |                     |       |                   |       |                                                 |                     |       |                   |       |
| Age (years)                                |                                                         |                     |       |                   |       |                                                 |                     |       |                   |       |
| < 70                                       | 1,8                                                     | 0,49                | 0,000 | 0,62              | 0,012 | 1,5                                             | 0,34                | 0,000 | 0,47              | 0,000 |
| 70 - 79                                    | 2,9                                                     | 0,45                | 0,003 | 0,57              | 0,043 | 3,9                                             | 0,35                | 0,000 | 0,47              | 0,002 |
| ≥ 80                                       | 3,3                                                     | 0,41                | 0,082 | 0,51              | 0,184 | 7,1                                             | 0,71                | 0,309 | 0,99              | 0,975 |
| Severity of cholelithiasis                 |                                                         |                     |       |                   |       |                                                 |                     |       |                   |       |
| Low                                        | 1,9                                                     | 0,37                | 0,000 | 0,46              | 0,003 | 1,2                                             | 0,29                | 0,000 | 0,43              | 0,005 |
| Moderate                                   | 2,0                                                     | 0,58                | 0,005 | 0,78              | 0,224 | 2,2                                             | 0,34                | 0,000 | 0,55              | 0,001 |
| High                                       | 3,7                                                     | 0,24                | 0,000 | 0,30              | 0,004 | 6,2                                             | 0,38                | 0,002 | 0,56              | 0,071 |
| Previous upper abdominal surgery           |                                                         |                     |       |                   |       |                                                 |                     |       |                   |       |
| No                                         | 2,0                                                     | 0,47                | 0,000 | 0,60              | 0,001 | 2,0                                             | 0,29                | 0,000 | 0,52              | 0,000 |
| Yes                                        | 5,7                                                     | 0,26                | 0,256 | 0,36              | 0,388 | 4,3                                             | 0,41                | 0,470 | 0,86              | 0,905 |
| Type of admission                          |                                                         |                     |       |                   |       |                                                 |                     |       |                   |       |
| Elective                                   | 1,6                                                     | 0,31                | 0,000 | 0,37              | 0,000 | 1,5                                             | 0,33                | 0,000 | 0,48              | 0,000 |
| Emergency                                  | 3,0                                                     | 0,76                | 0,178 | 0,94              | 0,764 | 3,4                                             | 0,35                | 0,000 | 0,56              | 0,002 |

Figure 1. Selection of the study population

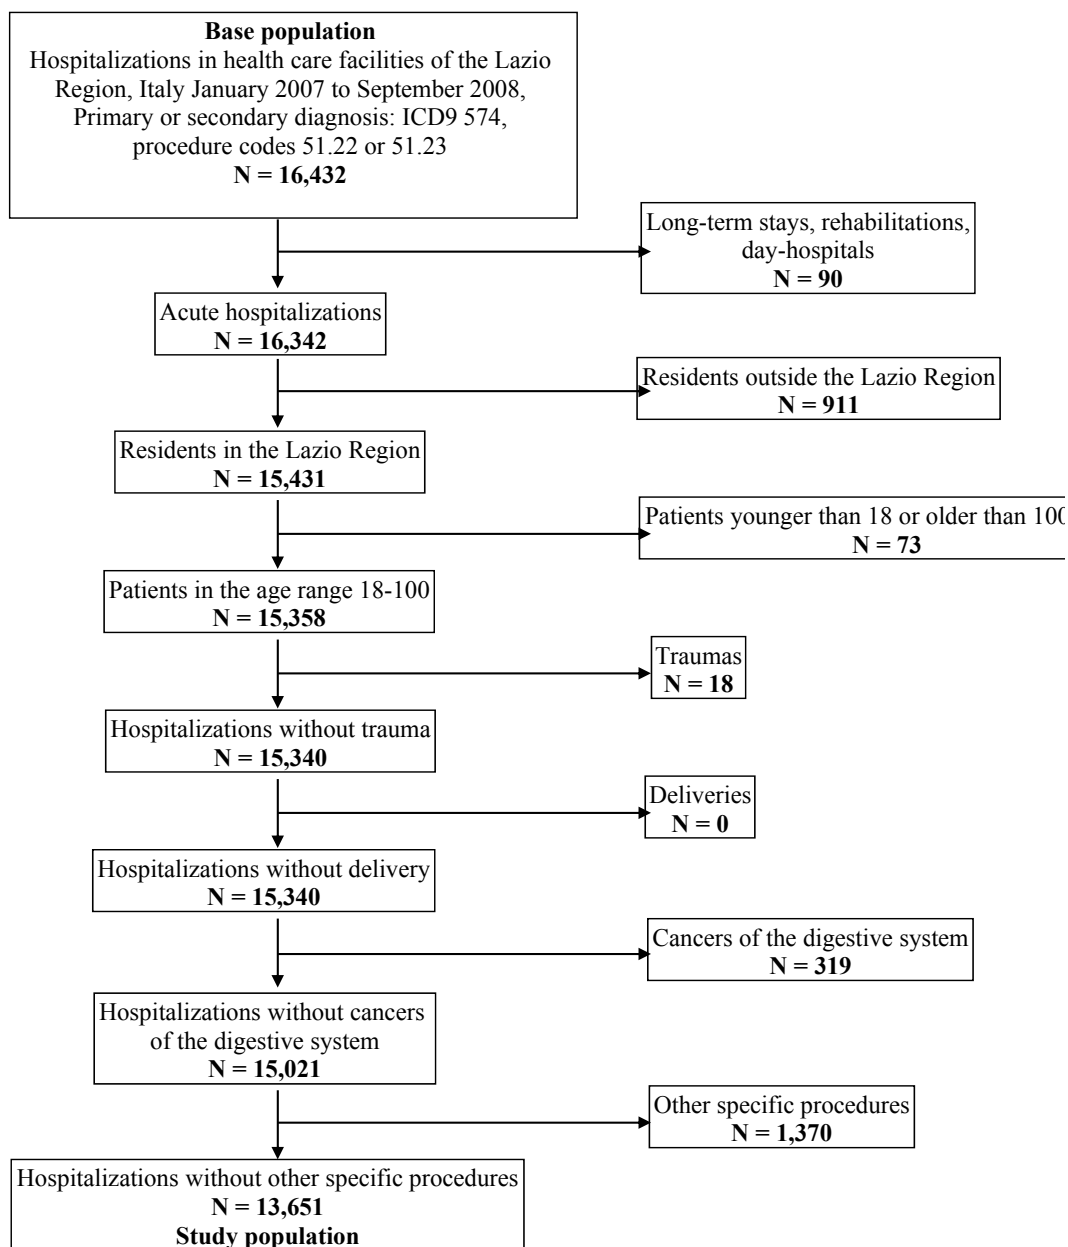

1  
2  
3  
4  
5  
6  
7  
8  
9  
10  
11  
12  
13  
14  
15  
16  
17  
18  
19  
20  
21  
22  
23  
24  
25  
26  
27  
28  
29  
30  
31  
32  
33  
34  
35  
36  
37  
38  
39  
40  
41  
42  
43  
44  
45  
46  
47  
48  
49  
50  
51  
52  
53  
54  
55  
56  
57  
58  
59  
60

0 years

For peer review only

## SUPPLEMENTARY DATA

### DETAILED METHODS

#### PART 1 - Cohort selection

Source of data: Hospital Information System (HIS)

##### *Inclusion criteria*

All hospital admissions with a primary or secondary contributing diagnosis of cholelithiasis (International Classification of Diseases 9th Revision, Clinical Modification - ICD9-CM = 574) and a procedure code of cholecystectomy (ICD9-CM 51.22, 51.23), occurred in private and public hospitals of the Lazio Region between January 2007 and September 2008 were included, for a total of 16,432 cases. The final population, after sequential exclusions, consisted of 13,651 subjects.

##### *Exclusion criteria*

- long-term hospitalizations, rehabilitations and day-hospitals
- patients residents outside the Lazio Region
- subjects younger than 18 or older than 100 years old
- hospitalizations for delivery (MDC 14)
- hospitalizations for any type of trauma (ICD-9-CM codes ICD-9-CM 800-897)
- hospitalizations with diagnoses of cancer of the digestive system (ICD-9-CM codes 150-159)
- hospitalizations with other abdominal surgical procedures, as follows:

#### ICD-9-CM code Description

##### Stomach

43.5 Partial gastrectomy with anastomosis to esophagus

43.6 Partial gastrectomy with anastomosis to duodenum

43.7 Partial gastrectomy with anastomosis to jejunum

43.8 Other partial gastrectomy

43.9 Total gastrectomy

44.31 High gastric bypass

44.39 Other gastroenterostomy

44.40 Suture of peptic ulcer, not otherwise specified

44.41 Suture of gastric ulcer site

44.42 Suture of duodenal ulcer site

44.5 Revision of gastric anastomosis

44.61 Suture of laceration of stomach

44.63 Closure of other gastric fistula

44.64 Gastropexy

44.65 Esophagogastroplasty

44.69 Other

##### Small intestine

45.31 Other local excision of lesion of duodenum

45.32 Other destruction of lesion of duodenum

45.33 Local excision of lesion or tissue of small intestine, except duodenum

45.34 Other destruction of lesion of small intestine, except duodenum

45.50 Isolation of intestinal segment, not otherwise specified

45.51 Isolation of segment of small intestine

1  
2  
3 45.6 *Other excision of small intestine*  
4 45.9 *Intestinal anastomosis*  
5 45.91 *Small-to-small intestinal anastomosis*  
6 45.92 *Anastomosis of small intestine to rectal stump*  
7 45.93 *Other small-to-large intestinal anastomosis*  
8 46.01 *Exteriorization of small intestine*  
9 46.02 *Resection of exteriorized segment of small intestine*  
10 46.60 *Fixation of intestine, not otherwise specified*  
11 46.61 *Fixation of small intestine to abdominal wall*  
12 46.62 *Other fixation of small intestine*  
13 46.71 *Suture of laceration of duodenum*  
14 46.72 *Closure of fistula of duodenum*  
15 46.73 *Suture of laceration of small intestine, except duodenum*  
16 46.74 *Closure of fistula of small intestine, except duodenum*  
17 46.80 *Intra-abdominal manipulation of intestine, not otherwise specified*  
18 46.81 *Intra-abdominal manipulation of small intestine*  
19 46.93 *Revision of anastomosis of small intestine*  
20 46.97 *Transplant of intestine*  
21  
22

#### Liver

23  
24  
25 50.2 *Local excision or destruction of liver tissue or lesion*  
26 50.3 *Lobectomy of liver*  
27 50.4 *Total hepatectomy*  
28 50.5 *Liver transplant*  
29 50.6 *Repair of liver*  
30

#### Pancreas

31  
32  
33 52.22 *Other excision or destruction of lesion or tissue of pancreas or pancreatic duct*  
34 52.3 *Marsupialization of pancreatic cyst*  
35 52.4 *Internal drainage of pancreatic cyst*  
36 52.5 *Partial pancreatectomy*  
37 52.6 *Total pancreatectomy*  
38 52.7 *Radical pancreaticoduodenectomy*  
39 52.8 *Transplant of pancreas*  
40 52.95 *Other repair of pancreas*  
41 52.96 *Anastomosis of pancreas*  
42  
43

#### Abdominal Hernia

44  
45 53.4 *Repair of umbilical hernia*  
46 53.5 *Repair of other hernia of anterior abdominal wall (without graft or prosthesis)*  
47 53.6 *Repair of other hernia of anterior abdominal wall with graft or prosthesis*  
48 53.7 *Repair of diaphragmatic hernia, abdominal approach*  
49

#### Peritoneum

50  
51 54.4 *Excision or destruction of peritoneal tissue*  
52 54.5 *Lysis of peritoneal adhesions*  
53 54.6 *Suture of abdominal wall and peritoneum*  
54 54.7 *Other repair of abdominal wall and peritoneum*  
55  
56

#### Large intestine

57  
58 45.41 *Excision of lesion or tissue of large intestine*  
59  
60

1  
2  
3 45.49 *Other destruction of lesion of large intestine*  
4 45.7 *Open and other partial excision of large intestine*  
5 45.8 *Total intra-abdominal colectomy*  
6 45.94 *Large-to-large intestinal anastomosis*  
7 46.03 *Exteriorization of large intestine*  
8 46.04 *Resection of exteriorized segment of large intestine*  
9 46.63 *Fixation of large intestine to abdominal wall*  
10 46.64 *Other fixation of large intestine*  
11 46.75 *Suture of laceration of large intestine*  
12 46.76 *Closure of fistula of large intestine*  
13 46.79 *Other repair of intestine*  
14

15  
16 **Other surgery**

17 55.4 *Partial nephrectomy*  
18 55.5 *Complete nephrectomy*  
19 56.2 *Ureterotomy*  
20 56.4 *Ureterectomy*  
21 57.1 *Cystotomy and cystostomy*  
22 57.6 *Partial cystectomy*  
23 57.7 *Total cystectomy*  
24 65.3 *Unilateral oophorectomy*  
25 65.4 *Unilateral salpingo-oophorectomy*  
26 65.5 *Bilateral oophorectomy*  
27 65.6 *Bilateral salpingo-oophorectomy*  
28 66.4 *Total unilateral salpingectomy*  
29 66.5 *Total bilateral salpingectomy*  
30 68.3 *Subtotal abdominal hysterectomy*  
31 68.4 *Total abdominal hysterectomy*  
32 68.6 *Radical abdominal hysterectomy*  
33 68.8 *Pelvic evisceration*  
34  
35  
36  
37  
38  
39

40 **PART 2 - Codes to describe severity of cholelithiasis**

41 **1 - Cholelithiasis of the biliary tract without complications**

42  
43  
44 574.20 *Calculus of gallbladder without mention of cholecystitis*  
45 574.50 *Calculus of bile duct without mention of cholecystitis*  
46 574.90 *Calculus of gallbladder and bile duct without cholecystitis*  
47

48 **2. Cholelithiasis of the biliary tract with cholecystitis (without obstruction)**

49  
50  
51 574.10 *Calculus of gallbladder with other cholecystitis*  
52 574.40 *Calculus of bile duct with other cholecystitis*  
53 574.70 *Calculus of gallbladder and bile duct with other cholecystitis*  
54

55 575.1 *Other cholecystitis AND*

56 574.20 *Calculus of gallbladder without mention of cholecystitis or*  
57 574.50 *Calculus of bile duct without mention of cholecystitis or*  
58 574.90 *Calculus of gallbladder and bile duct without cholecystitis*  
59  
60



1  
2  
3 574.00 *Calculus of gallbladder with acute cholecystitis*  
4 574.30 *Calculus of bile duct with acute cholecystitis*  
5 574.60 *Calculus of gallbladder and bile duct with acute cholecystitis*  
6 574.80 *Calculus of gallbladder and bile duct with acute and chronic cholecystitis*  
7

8 575.0 *Acute cholecystitis AND*

9  
10 574.20 *Calculus of gallbladder without mention of cholecystitis or*  
11 574.50 *Calculus of bile duct without mention of cholecystitis or*  
12 574.90 *Calculus of gallbladder and bile duct without cholecystitis*

13 576.1 *Cholangitis AND*

14 574.20 *Calculus of gallbladder without mention of cholecystitis or*  
15 574.50 *Calculus of bile duct without mention of cholecystitis or*  
16 574.90 *Calculus of gallbladder and bile duct without cholecystitis*  
17

18 **3. Cholelithiasis of the biliary tract with obstruction (without cholecystitis)**

19 574.21 *Calculus of gallbladder without mention of cholecystitis*  
20 574.51 *Calculus of bile duct without mention of cholecystitis*  
21 574.91 *Calculus of gallbladder and bile duct without cholecystitis*  
22

23 575.2 *Obstruction of gallbladder AND*

24 574.20 *Calculus of gallbladder without mention of cholecystitis or*  
25 574.50 *Calculus of bile duct without mention of cholecystitis or*  
26 574.90 *Calculus of gallbladder and bile duct without cholecystitis*  
27

28 576.2 *Obstruction of bile duct AND*

29 574.20 *Calculus of gallbladder without mention of cholecystitis or*  
30 574.50 *Calculus of bile duct without mention of cholecystitis or*  
31 574.90 *Calculus of gallbladder and bile duct without cholecystitis*  
32

33 575.3 *Hydrops of gallbladder*  
34

35 **3. Cholelithiasis of the biliary tract with both obstruction and cholecystitis**

36  
37  
38 574.01 *Calculus of gallbladder with acute cholecystitis*  
39 574.11 *Calculus of gallbladder with other cholecystitis*  
40 574.31 *Calculus of bile duct with acute cholecystitis*  
41 574.41 *Calculus of bile duct with other cholecystitis*  
42 574.61 *Calculus of gallbladder and bile duct with acute cholecystitis*  
43 574.71 *Calculus of gallbladder and bile duct with other cholecystitis*  
44 574.81 *Calculus of gallbladder and bile duct with acute and chronic cholecystitis*  
45  
46

47 575.2 *Obstruction of gallbladder AND*

48 574.00 *Calculus of gallbladder with acute cholecystitis*  
49 575.0 *Acute cholecystitis AND 574.20 Calculus of gallbladder without mention of*  
50 *cholecystitis*  
51 575.1 *Other cholecystitis AND 574.20 Calculus of gallbladder without mention of*  
52 *cholecystitis*  
53 574.30 *Calculus of bile duct with acute cholecystitis*  
54 575.0 *Acute cholecystitis AND 574.50 Calculus of bile duct without mention of cholecystitis*  
55 575.1 *Other cholecystitis AND 574.50 Calculus of bile duct without mention of cholecystitis*  
56 574.60 *Calculus of gallbladder and bile duct with acute cholecystitis*  
57 574.70 *Calculus of gallbladder and bile duct with other cholecystitis*  
58  
59  
60

1  
2  
3 574.80 *Calculus of gallbladder and bile duct with acute and chronic cholecystitis*  
4  
5

6 576.2 *Obstruction of bile duct AND*

7 574.00 *Calculus of gallbladder with acute cholecystitis*

8 575.0 *Acute cholecystitis AND 574.20 Calculus of gallbladder without mention of*  
9 *cholecystitis*

10 575.1 *Other cholecystitis AND 574.20 Calculus of gallbladder without mention of*  
11 *cholecystitis*

12 574.30 *Calculus of bile duct with acute cholecystitis*

13 575.0 *Acute cholecystitis AND 574.50 Calculus of bile duct without mention of cholecystitis*

14 575.1 *Other cholecystitis AND 574.50 Calculus of bile duct without mention of cholecystitis*

15 574.60 *Calculus of gallbladder and bile duct with acute cholecystitis*

16 574.70 *Calculus of gallbladder and bile duct with other cholecystitis*

17 574.80 *Calculus of gallbladder and bile duct with acute and chronic cholecystitis*  
18  
19  
20  
21  
22

23 **PART 3 - Codes to describe previous upper abdominal surgery**

24  
25 Codes in the index admission – post procedural states

26 stomach V44.1, V45.75, V55.1

27 intestine V44.2, V44.4, V45.3, V45.72, V53.5, V55.2, V55.4, V42.84

28 liver V42.7

29 pancreas 42.83  
30  
31

32 Codes in the previous 2-year- hospitalizations

33  
34 **Stomach**

35 43.5 *Partial gastrectomy with anastomosis to esophagus*

36 43.6 *Partial gastrectomy with anastomosis to duodenum*

37 43.7 *Partial gastrectomy with anastomosis to jejunum*

38 43.8 *Other partial gastrectomy*

39 43.9 *Total gastrectomy*

40 44.31 *High gastric bypass*

41 44.39 *Other gastroenterostomy*

42 44.40 *Suture of peptic ulcer, not otherwise specified*

43 44.41 *Suture of gastric ulcer site*

44 44.42 *Suture of duodenal ulcer site*

45 44.5 *Revision of gastric anastomosis*

46 44.61 *Suture of laceration of stomach*

47 44.63 *Closure of other gastric fistula*

48 44.64 *Gastropexy*

49 44.65 *Esophagogastroplasty*

50 44.69 *Other*  
51  
52  
53

54 **Small intestine**

55 45.31 *Other local excision of lesion of duodenum*

56 45.32 *Other destruction of lesion of duodenum*

57 45.33 *Local excision of lesion or tissue of small intestine, except duodenum*

58 45.34 *Other destruction of lesion of small intestine, except duodenum*  
59  
60

1  
2  
3 45.50 Isolation of intestinal segment, not otherwise specified  
4 45.51 Isolation of segment of small intestine  
5 45.6 Other excision of small intestine  
6 45.9 Intestinal anastomosis  
7 45.91 Small-to-small intestinal anastomosis  
8 45.92 Anastomosis of small intestine to rectal stump  
9 45.93 Other small-to-large intestinal anastomosis  
10 46.01 Exteriorization of small intestine  
11 46.02 Resection of exteriorized segment of small intestine  
12 46.60 Fixation of intestine, not otherwise specified  
13 46.61 Fixation of small intestine to abdominal wall  
14 46.62 Other fixation of small intestine  
15 46.71 Suture of laceration of duodenum  
16 46.72 Closure of fistula of duodenum  
17 46.73 Suture of laceration of small intestine, except duodenum  
18 46.74 Closure of fistula of small intestine, except duodenum  
19 46.80 Intra-abdominal manipulation of intestine, not otherwise specified  
20 46.81 Intra-abdominal manipulation of small intestine  
21 46.93 Revision of anastomosis of small intestine  
22 46.97 Transplant of intestine  
23  
24  
25

#### Liver

26  
27 50.2 Local excision or destruction of liver tissue or lesion  
28 50.3 Lobectomy of liver  
29 50.4 Total hepatectomy  
30 50.5 Liver transplant  
31 50.6 Repair of liver  
32  
33

#### Pancreas

34  
35 52.22 Other excision or destruction of lesion or tissue of pancreas or pancreatic duct  
36 52.3 Marsupialization of pancreatic cyst  
37 52.4 Internal drainage of pancreatic cyst  
38 52.5 Partial pancreatectomy  
39 52.6 Total pancreatectomy  
40 52.7 Radical pancreaticoduodenectomy  
41 52.8 Transplant of pancreas  
42 52.95 Other repair of pancreas  
43 52.96 Anastomosis of pancreas  
44  
45

#### Abdominal Hernia

46  
47 53.4 Repair of umbilical hernia  
48 53.5 Repair of other hernia of anterior abdominal wall (without graft or prosthesis)  
49 53.6 Repair of other hernia of anterior abdominal wall with graft or prosthesis  
50 53.7 Repair of diaphragmatic hernia, abdominal approach  
51  
52

#### Peritoneum

53  
54 54.4 Excision or destruction of peritoneal tissue  
55 54.5 Lysis of peritoneal adhesions  
56 54.6 Suture of abdominal wall and peritoneum  
57 54.7 Other repair of abdominal wall and peritoneum  
58  
59  
60

1  
2  
3 Large intestine

4 45.41 Excision of lesion or tissue of large intestine  
5 45.49 Other destruction of lesion of large intestine  
6 45.7 Open and other partial excision of large intestine  
7 45.8 Total intra-abdominal colectomy  
8 45.94 Large-to-large intestinal anastomosis  
9 46.03 Exteriorization of large intestine  
10 46.04 Resection of exteriorized segment of large intestine  
11 46.63 Fixation of large intestine to abdominal wall  
12 46.64 Other fixation of large intestine  
13 46.75 Suture of laceration of large intestine  
14 46.76 Closure of fistula of large intestine  
15 46.79 Other repair of intestine  
16  
17

18 Other surgery

19 55.4 Partial nephrectomy  
20 55.5 Complete nephrectomy  
21 56.2 Ureterotomy  
22 56.4 Ureterectomy  
23 57.1 Cystotomy and cystostomy  
24 57.6 Partial cystectomy  
25 57.7 Total cystectomy  
26 65.3 Unilateral oophorectomy  
27 65.4 Unilateral salpingo-oophorectomy  
28 65.5 Bilateral oophorectomy  
29 65.6 Bilateral salpingo-oophorectomy  
30 66.4 Total unilateral salpingectomy  
31 66.5 Total bilateral salpingectomy  
32 68.3 Subtotal abdominal hysterectomy  
33 68.4 Total abdominal hysterectomy  
34 68.6 Radical abdominal hysterectomy  
35 68.8 Pelvic evisceration  
36  
37  
38  
39

40 **PART 4 - Codes to describe coexisting conditions**

41 On the basis of previous 2-year hospitalizations (following a validated coding algorithm – enhanced  
42 Elixhauser AHRQ-Web-ICD-9-CM - see reference n. 17 cited in the text).  
43  
44

45 diabetes 250.xx; hypertension 401-405; obesity 280.0, ischemic disease 410-414, 429.7, previous  
46 revascularization V45.81, V45.82, procedures 36.0, 36.1, heart failure 428, other cardiac disease  
47 093.2, 391, 393-398, 420-425, 429, 745, 746.3-646.6, V15.1, V42.2, V43.2, V43.3, V45.0  
48 arrhythmia / conduction disorders 426-427, cerebrovascular disease 430-438, vascular disease 440-  
49 448, 557, hematologic disorders 280-285, 286, 287.1, 287.3-287.5, 288, 289, chronic respiratory  
50 disease 490-496, 518.81, 518.82, chronic liver disease / pancreas 571, 572, 577.1, 577.9, chronic  
51 renal disease 582-583, 585-588, V42.0, V45.1m V56, cancer 140-208.9  
52  
53  
54  
55

56 **PART 5 - Codes to describe outcomes**

57  
58 **A) Surgical-related complications (within 30 day after the surgery)**  
59  
60

in the index or in the subsequent hospitalizations (excluding hospitalizations for trauma ICD-9-CM 800-897) and delivery (MDC 14)

at least one of the following:

- 998.1 Hemorrhage or hematoma or seroma complicating a procedure
- 998.2 Accidental puncture or laceration during a procedure
- 998.3 Disruption of wound
- 998.4 Foreign body accidentally left during a procedure
- 998.5 Postoperative infection
- 998.6 Persistent postoperative fistula
- 998.7 Acute reaction to foreign substance accidentally left during a procedure
- 998.81 Emphysema (subcutaneous) (surgical) resulting from a procedure
- 998.83 Non-healing surgical wound
- 998.89 Other specified complications
- 997.4 Digestive system complications
- 998.9 Unspecified complication of procedure, not elsewhere classified

Only in the subsequent hospitalizations

at least one of the following:

- 567 Peritonitis and retroperitoneal infections
- 575.4 Perforation of gallbladder
- 575.5 Fistula of gallbladder
- 576.0 Postcholecystectomy syndrome
- 576.3 Perforation of bile duct
- 576.4 Fistula of bile duct
- 570 Acute and subacute necrosis of liver
- 789.0 Abdominal pain

**B) Systemic complications (within 30 day after the surgery)**

in the index or in the subsequent hospitalizations (excluding hospitalizations for trauma ICD-9-CM 800-897) and delivery (MDC 14)

at least one of the following:

- 997.0 Nervous system complications
- 997.1 Cardiac complications
- 997.3 Respiratory complications
- 998.0 Postoperative shock
- 410 Acute myocardial infarction
- 415.1 Pulmonary embolism and infarction
- 431 Intracerebral hemorrhage
- 433.x1 Occlusion and stenosis of precerebral arteries with infarction
- 434.x1 Occlusion of cerebral arteries with infarction
- 436 Acute, but ill-defined, cerebrovascular disease
- 480-486 Pneumonia
- 513.0 Abscess of lung
- 518.4 Acute edema of lung, unspecified
- 518.5 Pulmonary insufficiency following trauma and surgery
- 785.5 Shock without mention of trauma

1  
2  
3  
4  
5  
6  
7  
8  
9  
10  
11  
12  
13  
14  
15  
16  
17  
18  
19  
20  
21  
22  
23  
24  
25  
26  
27  
28  
29  
30  
31  
32  
33  
34  
35  
36  
37  
38  
39  
40  
41  
42  
43  
44  
45  
46  
47  
48  
49  
50  
51  
52  
53  
54  
55  
56  
57  
58  
59  
60

*788.2 Retention of urine*

Only in the subsequent hospitalizations  
*038 Septicemia*

For peer review only



**Thirty-day complications after laparoscopic or open cholecystectomy: a population-based cohort study in Italy.**

|                                 |                                                                                                                                                                                                                                                                                                                                                                                                         |
|---------------------------------|---------------------------------------------------------------------------------------------------------------------------------------------------------------------------------------------------------------------------------------------------------------------------------------------------------------------------------------------------------------------------------------------------------|
| Journal:                        | <i>BMJ Open</i>                                                                                                                                                                                                                                                                                                                                                                                         |
| Manuscript ID:                  | bmjopen-2012-001943.R1                                                                                                                                                                                                                                                                                                                                                                                  |
| Article Type:                   | Research                                                                                                                                                                                                                                                                                                                                                                                                |
| Date Submitted by the Author:   | 09-Dec-2012                                                                                                                                                                                                                                                                                                                                                                                             |
| Complete List of Authors:       | Agabiti, Nera; Regional Health Service, Lazio, Epidemiology<br>Stafoggia, Massimo; Regional Health Service, Lazio, Epidemiology<br>Davoli, Marina; Regional Health Service, Lazio, Epidemiology<br>Fusco, Danilo; Regional Health Service, Lazio, Epidemiology<br>Barone, Anna; Regional Health Service, Lazio, Epidemiology<br>Perucci, Carlo; National Agency for Regional Health Services, Direction |
| <b>Primary Subject Heading</b>: | Epidemiology                                                                                                                                                                                                                                                                                                                                                                                            |
| Secondary Subject Heading:      | Evidence based practice, Health services research, Surgery, Gastroenterology and hepatology                                                                                                                                                                                                                                                                                                             |
| Keywords:                       | EPIDEMIOLOGY, Adverse events < THERAPEUTICS, QHepatobiliary surgery < uality in health care < HEALTH SERVICES ADMINISTRATION & MANAGEMENT, PUBLIC HEALTH, Clinical governance < HEALTH SERVICES ADMINISTRATION & MANAGEMENT, Health & safety < HEALTH SERVICES ADMINISTRATION & MANAGEMENT                                                                                                              |
|                                 |                                                                                                                                                                                                                                                                                                                                                                                                         |

SCHOLARONE™  
Manuscripts

only

1  
2  
3 **Thirty-day complications after laparoscopic or open cholecystectomy: a population-**  
4 **based cohort study in Italy.**  
5  
6

7 **Authors**  
8

9 Nera Agabiti MD, Massimo Stafoggia MS, Marina Davoli MD PhD, Danilo Fusco MS, Anna  
10 Patrizia Barone MD and Carlo A.Perucci MD\*.  
11

12 Department of Epidemiology, Regional Health Service, Lazio Region, Rome, Italy  
13

14 \*National Agency for Regional Health Services, Rome, Italy  
15  
16  
17  
18  
19

20 **Correspondence**  
21

22 Dott.ssa Nera Agabiti  
23

24 Department of Epidemiology, Regional Health Service, Lazio Region  
25

26 Via di S.Costanza 53  
27

28 00198 Rome (Italy)  
29

30 Tel 39-6-83060402  
31

32 Fax 39-6-83060374  
33

34 e:mail: [n.agabiti@deplazio.it](mailto:n.agabiti@deplazio.it)  
35  
36  
37  
38  
39

40 **Short running head:** Effectiveness of cholecystectomy  
41

42 **Word count for abstract:** 264  
43

44 **Word count for manuscript:** 2886  
45  
46  
47  
48

49 This work was supported by the Regional Health Service, Lazio Region on the behalf of  
50 P.Re.Val.E. Regional Outcome Evaluation Program. Lazio Region (Italy)  
51

52 <http://www.epidemiologia.lazio.it/prevale11/>  
53  
54  
55  
56  
57  
58  
59  
60



1  
2  
3 **Thirty-day complications after laparoscopic or open cholecystectomy: a population-**  
4 **based cohort study in Italy.**  
5  
6  
7

8  
9 **Abstract**

10  
11 **Objective**

12  
13  
14 The objective of the study is to evaluate short-term complications after laparoscopic (LC) or  
15 open cholecystectomy (OC) in patients with gallstones by using linked hospital discharge  
16 data.  
17  
18  
19

20  
21 **Design**

22  
23 Population-based cohort study.  
24

25  
26 **Setting**

27  
28 Data were obtained from the Regional Hospital Discharge Registry Lazio Region in Central  
29 Italy (around 5 million inhabitants) in 2007-2008.  
30

31  
32 **Participants**

33  
34 All patients admitted to hospitals of Lazio with symptomatic gallstones (ICD9-CM = 574)  
35 who underwent LC (ICD9-CM 51.23) or OC (ICD9-CM 51.22).  
36  
37

38  
39 **Outcome measures**

40  
41 1)“30-day surgical-related complications” defined as any complication of the biliary tract  
42 (including post-operative infection, hemorrhage or hematoma or seroma complicating a  
43 procedure, persistent postoperative fistula, perforation of bile duct, disruption of wound); 2)  
44  
45  
46 “30-day systemic complications” defined as any complications of other organs (including  
47 sepsis, infections from other organs, major cardiovascular events and selected adverse  
48 events).  
49  
50  
51  
52

53  
54 **Results**  
55  
56  
57  
58  
59  
60

1  
2  
3 13,651 patients were included; 86.1% had LC, 13.9% OC. 2.0% experienced surgical-related  
4 complications (SRC), 2.1% systemic complications (SC). The Odds Ratio (OR) of  
5 complications after LC versus OC was 0.60 ( $p<0.001$ ) for SRC and 0.52 ( $p<0.001$ ) for SC. As  
6  
7 regards SRC, the advantage of LC was consistent across age categories, severity of gallstones  
8 and previous upper abdominal surgery, while there was no advantage among people with  
9 emergency admission (OR=0.94,  $p = 0.764$ ). For SC, no significant advantage of LC was seen  
10 among very old people (OR=0.99,  $p=0.975$ ) and among those with previous upper abdominal  
11 surgery (OR=0.86,  $p=0.905$ ).  
12  
13  
14  
15  
16  
17  
18  
19

## 20 **Conclusions**

21  
22 This large observational study confirms that LC is more effective than OC with respect to 30-  
23 day complications. Population-based linkage of administrative datasets can enlarge evidence  
24 of treatment benefits in clinical practice.  
25  
26  
27  
28  
29  
30  
31  
32  
33

34 **Key words:** administrative data, cohort study, effectiveness, gallstones, hospital discharge  
35 data, laparoscopic cholecystectomy, open cholecystectomy, outcomes, population-based,  
36 post-operative complications.  
37  
38  
39  
40  
41  
42  
43  
44  
45  
46  
47  
48  
49  
50  
51  
52  
53  
54  
55  
56  
57  
58  
59  
60

## Article summary

### Article focus

-The advantage of laparoscopic cholecystectomy (LC) approach for the treatment of gallstone versus open surgery (OC) has been shown from RCTs and observational studies.

-The use of linked administrative health records has become one of the most powerful tools in observational studies aimed at comparing treatments.

-We compared laparoscopic and open cholecystectomy in term of 30-day complications using routinely collected databases in Lazio Region (Italy).

### Key messages

-This population-based study contributes to enlarge the evidence on effectiveness of LC in a real-life setting.

-As regards surgical-related complications, the advantage of LC was consistent across age categories, severity of gallstones and previous upper abdominal surgery, while there was no advantage among people with emergency admission.

-For systemic complications, no significant advantage of LC was seen among very old people and among those with previous upper abdominal surgery.

### Strengths and limitations

-Population-based design, 30-day outcomes, large numbers and robustness of analytic procedures are the main strengths.

-It contributes to the debate on the complex methodology to estimated risk of adverse events after surgery using secondary databases to monitor quality of care.

1  
2  
3  
4  
5  
6  
7  
8  
9  
10  
11  
12  
13  
14  
15  
16  
17  
18  
19  
20  
21  
22  
23  
24  
25  
26  
27  
28  
29  
30  
31  
32  
33  
34  
35  
36  
37  
38  
39  
40  
41  
42  
43  
44  
45  
46  
47  
48  
49  
50  
51  
52  
53  
54  
55  
56  
57  
58  
59  
60

-The use of ICD-9-CM codes in the definition of severity of disease presentation and of complications is a major limit.

For peer review only

## Introduction

Comparative effectiveness research is becoming central to monitor real-life impact of treatments and support public health decisions (1, 2). Although the basic concept of comparing therapies is not new, over the last few years many initiatives have been implemented in several countries to provide large-scale evidence on benefits and harms of different treatments (3-5). The use of linked administrative health records has become one of the most powerful tools in observational studies aimed at comparing treatments. They include hospital in-patients records, birth and death registrations, outpatient care records, dispensed pharmacy drugs (6-9).

In the Lazio Region (around 5.000.000 inhabitants) the P.Re.Val.E. Project (*Regional Program for Assessing the Outcomes of Health-care Interventions*) was launched in 2005. Its aims are: to measure the quality of health care provided in the Lazio Region, to describe variability of care provision across institutions and populations and to compare effectiveness of treatments for different medical and surgical conditions (10,11). Over 60 outcomes indicators are calculated based on data obtained from record-linkage procedures of different health systems. The results are periodically updated and publicly disseminated with discussion on critical methodological points.

Cholecystectomy is one of the most common abdominal surgical procedures in developed countries. Since its introduction in the late '80s, laparoscopic cholecystectomy (LC) has replaced open cholecystectomy (OC) as the treatment of choice for symptomatic gallstones (12, 13). Beneficial effects of LC have been demonstrated in studies showing the advantages from real-life settings using secondary databases (9,14-19). In the present study we aimed at developing a methodology to measure short-term complications after LC or OC using large administrative databases on behalf of the P.Re.Val.E. Secondly, we tested the hypothesis that

1  
2  
3 the advantages of LC versus OC could vary according to age and clinical patients'  
4  
5 characteristics.  
6  
7  
8  
9  
10

## 11 12 13 14 **Methods**

### 15 16 Source of data

17  
18 Data was derived from the Lazio Hospital Information System (HIS), which provides  
19  
20 information on patients' demographic data (gender, age, place of birth, place of residence),  
21  
22 admission and discharge dates, discharge diagnoses (up to 6) and medical procedures or  
23  
24 surgical interventions ((up to 6) according to the International Classification of disease, Ninth  
25  
26 Revision, Clinical Modification (ICD-9-CM), status at discharge (alive, dead, transferred to  
27  
28 another hospital), ward(s) of stay, date(s) of in-hospital transfer, and a regional code  
29  
30 corresponding to the admitting facility for patients discharged from all public and private  
31  
32 hospital of the Lazio Region (5.759.839 inhabitants).  
33  
34  
35  
36  
37  
38

### 39 Study population

40  
41 All hospital admissions with a primary or secondary diagnosis of gallstones (International  
42  
43 Classification of Diseases 9<sup>th</sup> Revision, Clinical Modification - ICD9-CM = 574) and a  
44  
45 procedure code of cholecystectomy (ICD9-CM 51.22, 51.23), occurred in private and public  
46  
47 hospitals of the Lazio Region between January 2007 and September 2008 were included, for a  
48  
49 total of 16,432 cases (age 18+ years). We a priori decided not to include codes for partial  
50  
51 cholecystectomy (ICD-9-CM 51.21 and 51.24) to increase the specificity of our exposure.  
52  
53 Information was retrieved from the HIS. In order to increase the case specificity, several  
54  
55 exclusion criteria were applied including long-term hospitalizations, rehabilitations, day-  
56  
57  
58  
59  
60

1  
2  
3 hospitals, hospitalizations for delivery or trauma or cancer, hospitalizations with abdominal  
4  
5 surgical procedures other than cholecystectomy. The final population consisted of 13,651  
6  
7 subjects (**Figure 1**). See the online **Supplementary Data** (Part 1) for details on the exclusion  
8  
9 criteria and ICD9-CM codes.  
10

#### 11 12 13 14 Patient-level risk factors

15  
16 The following characteristics were considered for each patient: Age (<70; 70-79; >=80 years  
17  
18 old); Gender; Severity of gallstones: it was classified as *low* (not-complicated), *moderate*  
19  
20 (presence of cholecystitis or biliary tract obstruction), and *high* (presence of both  
21  
22 inflammation and obstruction of the biliary tract); Previous upper abdominal surgery (based  
23  
24 on previous 2-year hospitalizations); Comorbidities (based on previous 2-year  
25  
26 hospitalizations) following validated algorithms (20,21); Type of admission: either *elective* or  
27  
28 *emergency*. See the online **Supplementary Data** (Part 2-4) for details on the ICD-9-CM  
29  
30 codes. The choice of *cut off* for age category was based on previous studies to distinguish  
31  
32 adult and old people (22-24).  
33  
34  
35

#### 36 Outcomes

37  
38 We identified various complications within 30-days after the intervention and grouped them  
39  
40 in two categories: 1) “*30-day surgical-related complications*” defined as any complication of  
41  
42 the biliary tract (including post-operative infection, hemorrhage or hematoma or seroma  
43  
44 complicating a procedure, persistent postoperative fistula, perforation of bile duct, disruption  
45  
46 of wound ()); 2) “*30-day systemic complications*” defined as any complications of other organs  
47  
48 (including sepsis, infections from other organs, major cardiovascular events and  
49  
50 selected adverse events). The complete list of complications with ICD-9-CM codes is  
51  
52 reported in the online **Supplementary Data** (Part 5). Among the various complications we  
53  
54 included some conditions reported in the list of Patient Safety Indicators recently developed  
55  
56  
57  
58  
59  
60

1  
2  
3 by the Agency for Health Care Research and Quality, while other items were specifically  
4 created on the basis of scientific literature on digestive surgery (14-19,25,26). Depending on  
5 the type of complication, some ICD9-CM codes were searched in both the index admission  
6 and the following ones in the 30-day period after the surgery, others were searched only in  
7 later hospitalizations. For example, peritonitis or acute pancreatitis was not counted as  
8 complications when reported in the index admission. See the online **Supplementary Data**  
9 (Part 5) for details on the ICD9-CM codes. In the case of a subsequent hospitalization  
10 occurred out of the study area (for example, in a region other than Lazio), we obtained  
11 information through record linkage procedure between hospital information systems. Because  
12 of the short follow up time, this happened in a minimal proportion of cases (0.1%). The  
13 outcome variables were: “30-day surgical-related complications” and “30-day systemic  
14 complications”; they were coded “1” if at least one of the complications within the group was  
15 present and “0” if none was recorded.  
16  
17  
18  
19  
20  
21  
22  
23  
24  
25  
26  
27  
28  
29  
30  
31  
32  
33

#### 34 Type of cholecystectomy

35  
36 As exposure variable we defined “*type of cholecystectomy*” (laparoscopic cholecystectomy,  
37 LC vs. open cholecystectomy, OC). In the case of ICD-9-CM codes for both LC and OC  
38 (5%), the patient was considered exposed to the open surgical procedure. We could not use  
39 the specific ICD-9-code for a case converted from LC to OC (ICD-9-CM code V 64.41)  
40 because it was highly under-reported in our Region in the study period.  
41  
42  
43  
44  
45  
46  
47  
48  
49  
50

#### 51 Statistical analysis

52 Multiple logistic regression models were fitted to estimate the relative risk of 30-day  
53 complications (either “surgical-related” or “systemic”) after LC versus OC, adjusting for  
54 demographical and clinical risk factors. The two outcome variables were analysed separately.  
55  
56  
57  
58  
59  
60



1  
2  
3 The predictive model was made of two sets of predictors: 1) variables “a priori” chosen as  
4 confounders (age, gender, severity of gallstones, previous upper abdominal surgery, and type  
5 of admission); 2) variables empirically tested (comorbidities) which were selected using  
6 iterative stepwise statistical procedures) (27). Once the “best” predictive model was identified  
7 for each of the two outcome, the variable “*type of cholecystectomy*” was included, and the  
8 adjusted odds ratio (OR) of LC versus open surgery was estimated, with corresponding 95%  
9 confidence interval (95% CI) and p-value.  
10  
11  
12  
13  
14  
15  
16  
17  
18  
19

20  
21 In order to test the hypothesis of an effect modification by age, relative risk estimates for the  
22 age groups were derived by adding an interaction term between the age group and the  
23 treatment variable in the final multivariate logistic model. We obtained the OR of  
24 laparoscopic vs. open surgery within each age stratum by adding the corresponding  
25 interaction terms coefficients. This was accomplished by adding the coefficient from the  
26 reference category and that from the age stratum of interest, and by computing the  
27 corresponding standard error from the corresponding terms of the variance-covariance matrix.  
28  
29 Similarly, effect modification was tested with regard to severity of cholelithiasis, previous  
30 upper abdominal surgery and type of admission. The corresponding tests of heterogeneity of  
31 the stratum-specific risk estimates were computed.  
32  
33  
34  
35  
36  
37  
38  
39  
40  
41  
42  
43  
44

45 Sensitivity analyses were performed. First, in order to guarantee adequate control of  
46 confounding factors we identified and adjusted for all the individual factors associated with  
47 the treatment, within the propensity adjustment framework (28). This procedure is a two-step  
48 technique: 1. it estimates the a priori probability of exposure for each subject, based on  
49 clinical and demographic characteristics; 2. it standardizes for them in the association between  
50 treatment and the study outcome. The individual factors related to the exposure in the present  
51  
52  
53  
54  
55  
56  
57  
58  
59  
60

1  
2  
3 study include age, gender, severity of cholelithiasis, previous upper abdominal surgery, type of  
4 admission, cardio-circulatory disease, cerebrovascular disease, COPD or respiratory failure,  
5 chronic nephropathy, chronic disease of the liver or pancreas. Second, to take into account the  
6 potential heterogeneous experience in laparoscopic surgery across different hospitals because  
7 of the patients' clustering within a single institution we perform a multilevel regression model  
8 with random intercepts for hospitals (29).  
9  
10  
11  
12  
13  
14  
15  
16  
17

18 All the statistical analyses were performed using SAS Software version 8.0 (SAS Institute,  
19 Inc. SAS/STAT software).  
20  
21  
22  
23  
24  
25  
26

## 27 **Results**

28  
29 A description of the study population, overall and by cholecystectomy procedure, is presented  
30 in **Table 1**. Over 80% of the patients were younger than 70 years, and moderate to high  
31 severity of the gallstones was diagnosed for 61.7%. As compared with patients undergoing  
32 LC, those who underwent OC were more likely to be elderly, males, with a more severe  
33 baseline disease and more chronic conditions. Furthermore, they were operated in emergency  
34 in most of the cases (52.4%), whereas LC was performed in elective hospitalizations much  
35 more frequently (73.9%).  
36  
37  
38  
39  
40  
41  
42  
43  
44  
45  
46

47 **Table 2** reports the relationship between demographic and clinical variables and the  
48 occurrence of complications. The adjusted risk of systemic complications increased with age  
49 and was much higher in patients with more severe baseline gallstones, whereas no clear age or  
50 severity-related differences in risk emerged with regard to surgical-related 30-day  
51 complications, once other co-factors were taken into account. Women were less likely to  
52  
53  
54  
55  
56  
57  
58  
59  
60

1  
2  
3 experience both types of complications. Having had a previous intervention on the upper  
4  
5 digestive system seemed to enhance the risk of both surgical-related and systemic  
6  
7 complications, though results are not statistically significant due to small power. Finally, the  
8  
9 risk of both types of complications was more evident in emergency as opposed to scheduled  
10  
11 interventions. Surgical-related complications were higher among subjects with obesity, blood  
12  
13 disease, stroke or chronic nephropathy, whereas systemic complications were associated with  
14  
15 blood diseases, ischemic heart disease, conduction disorders or dysrhythmias, COPD or  
16  
17 respiratory failure, chronic nephropathy, and chronic diseases of the liver or pancreas.  
18  
19

20  
21  
22 **Table 3** shows the relationship between type of cholecystectomy and outcomes, adjusted for  
23  
24 the risk factors identified in Table 2. We report results of the advantage of LC vs. OC (OR,  
25  
26 95% CI) in the cohort and in the each stratum of the variables tested in the models with  
27  
28 interaction terms. The incidence of “30-day surgical-related complications” and “30-day  
29  
30 systemic complications” was 2.0% and 2.1%, respectively. The odds ratio of surgical related  
31  
32 complications for patients who underwent LC as compared to patients with OC was 0.60  
33  
34 ( $p < 0.001$ ). The corresponding figure for systemic complications was 0.52 ( $p < 0.001$ ).  
35  
36

37  
38 As regards 30-day surgical-related complications, the protective effect of LC vs. OC was  
39  
40 consistent across the age category, severity of cholelithiasis and previous upper abdominal  
41  
42 surgery, while among people with emergency admission there was no advantage (OR=0.94  $p$   
43  
44 = 0.764). Similarly, for systemic complications, the superiority of LC vs. OC was consistent  
45  
46 regardless level of cholelithiasis severity, and elective/emergency admission, but for those  
47  
48 80+ yrs aged people there was no advantage of LC vs. OC (OR 0.99,  $p = 0.975$ ); also for  
49  
50 patients with previous upper abdominal surgery there was a much weaker advantage  
51  
52 (OR=0.86,  $p=0.905$ ).  
53  
54  
55  
56  
57  
58  
59  
60

1  
2  
3 When the association between type of cholecystectomy and 30-day complications was  
4  
5 adjusted with the propensity adjustment method, results were consistent with those obtained  
6  
7 with the risk-adjustment procedure (LC vs. OC OR= 0.61 and OR=0.52 respectively for the  
8  
9 two outcomes). Finally, results were similar taking into account patients' clustering within  
10  
11 different hospitals (*data not shown*).  
12  
13

### 14 15 16 17 18 **Discussion** 19

20 From this large observational study based on linked administrative health records - taking  
21  
22 into account the disomogeneous distribution of factors related to the probability to be offered  
23  
24 open surgery - people who end up having a LC have a better short-term prognosis than those  
25  
26 that get an OC for the treatment of gallstones. The superiority of laparoscopic approach in  
27  
28 term of 30-day complications is consistent in different age categories, different severity in  
29  
30 disease presentation and past history of upper abdominal surgery.  
31  
32  
33  
34  
35

36 This population-based study contributes to enlarge the evidence on effectiveness of LC in a  
37  
38 real-life setting by providing an example from the Southern Europe area. It supports the  
39  
40 usefulness of observational approaches. The 30-day outcomes linked to admission represent  
41  
42 one strength of this study. Despite RTCs are considered the optimal study design when  
43  
44 comparing efficacy of treatments, observational studies provide a picture of treatment under  
45  
46 usual circumstances of health-care practice and can answer to the question “*Does it work in*  
47  
48 *practice?*” (3,8). RTCs often have small sample size and may under represent vulnerable  
49  
50 patient groups, including elderly patients with multiple comorbidities, children, and young  
51  
52 women, and operate in a highly controlled environment that is far from routine clinical  
53  
54 practice. Our study supports that LC is a reliable approach safer than OC not only in old age  
55  
56  
57  
58  
59  
60

1  
2  
3 group - confirming previous findings (22, 30) - but also in presence of severe disease  
4 presentation and in patients with past history of upper digestive system surgery. Beneficial  
5 effect of LC as regards systemic complications tends to be lower in 80+ yrs aged in  
6 comparison with younger ages, and in patients with emergency admission in comparison to  
7 elective admissions as regards 30-day surgical-related complications. These data add to the  
8 evidence on the complex relationship between age and outcomes after surgery (22-24,30).  
9  
10  
11  
12  
13  
14  
15  
16  
17

18 A number of potential biases are present. First of all, people in the two groups of patients  
19 analyzed are not homogenous with a higher frequency of elderly and more severe patients in  
20 the open group than in the laparoscopic one. When comparing the effect of the two techniques  
21 using two different populations, the so called “indication bias” may affect study validity  
22 (8,31). To limit this problem we run the propensity adjustment analysis to take into account  
23 the different distribution of factors strongly associated with the probability to receive open  
24 surgery in the study population. This analytical approach confirmed the advantage of  
25 laparoscopic vs. open surgery obtained in the main logistic regression analysis. Another  
26 critical point is the potential different distribution of laparoscopic experience across surgeons;  
27 however a sensitivity analysis which took into account this point led to similar results. The  
28 use of ICD-9-CM codes in the definition of severity of disease presentation and of  
29 complications is another major limit. Discharge abstract data have little insight into clinical  
30 details and do not inform on the temporal relationship of the clinical conditions and processes,  
31 then defining complications is a difficult task (32). In this respect, we tried to improve the  
32 accuracy of our measures both 1) applying a specific coding algorithm with subsequent  
33 hospital admissions used to retrieve adverse events and 2) excluding in the “count” of  
34 complications specific items if reported in the index only (i.e. peritonitis) because of the  
35 difficulty to determine if it was already present at admission. Moreover, we cannot exclude an  
36  
37  
38  
39  
40  
41  
42  
43  
44  
45  
46  
47  
48  
49  
50  
51  
52  
53  
54  
55  
56  
57  
58  
59  
60

1  
2  
3 under-notification of complications – a major limit of our source of data - but it is unlikely  
4 that is influenced by the type of surgery. Another major problem is the potential  
5 misclassification of exposure since we were not able to measure the occurrence of conversion  
6 of LC to OC. The number of people that were switched from LC to OP is low in comparison  
7 to figures documented in other studies and it may represent a severe source of bias in our  
8 study (30,33).  
9  
10  
11  
12  
13  
14  
15  
16  
17

18 Beneficial effects of the laparoscopic approach versus traditional open surgery for the  
19 treatment of gallstones come from various randomized controlled trials (RCTs) (34). They  
20 found significant shorter hospital stay and quicker convalescence associated with LC but no  
21 differences in mortality, complications and operative time between the two procedures. A  
22 better trend with the laparoscopic approach, including morbidity and mortality, comes from  
23 observational studies. From a surveillance system in eight Swiss hospitals, surgical site  
24 infections were less common in laparoscopic approach in comparison to traditional open  
25 surgery (0.5% in LC vs. 1.8% in OC) (35). Significantly lower incidence of venous  
26 thromboembolism and surgical site-infections in laparoscopic cases versus open cases was  
27 observed in a large administrative dataset-based study in USA (14, 15). National estimates  
28 for LC in USA showed an increase in LC from 52% in 1991 to 75% in 2000 with a constantly  
29 low mortality rate and a decrease in biliary reconstruction rate over time (16). On the basis of  
30 the 1997-2006 trend analysis by the same authors LC was associated with a low mortality  
31 rate (mean value in the period: 0.52%) while OC with a significantly higher rate  
32 (corresponding value: 4.9%) (9). In a retrospective study using Medicare beneficiaries  
33 common bile duct (CBD) injury during cholecystectomy was associated with a significant  
34 higher risk of death in comparison to cholecystectomy without CBD injury over a 9.2 year  
35 follow up period (17). From a Swiss 1995-2005 hospital database analysis the incidence rate  
36  
37  
38  
39  
40  
41  
42  
43  
44  
45  
46  
47  
48  
49  
50  
51  
52  
53  
54  
55  
56  
57  
58  
59  
60

1  
2  
3 of bile duct injury after LC was 0.3% and did not change over time (18). The incidence of  
4  
5 conversion to OC after LC in all hospitals in England from 2005 to 2006 has been examined  
6  
7 using Hospital Episode Statistics and resulted 4.6% for elective procedures and 9.4% for  
8  
9 emergency procedures) (19).

10  
11 Population-based linkage of routinely collected health data represents a precious tool to  
12  
13 support large- scale and real-world practice evaluation by measuring specific outcomes and  
14  
15 comparing them over time and across populations. Together with results from experimental  
16  
17 research settings, the conclusions of research studies evaluating clinical outcomes through  
18  
19 data linkage systems should be successfully incorporated into practice by clinicians/surgeons.  
20  
21  
22  
23  
24  
25  
26  
27  
28  
29  
30  
31  
32  
33  
34  
35  
36  
37  
38  
39  
40  
41  
42  
43  
44  
45  
46  
47  
48  
49  
50  
51  
52  
53  
54  
55  
56  
57  
58  
59  
60

1  
2  
3  
4  
5  
6  
7  
8  
9  
10  
11  
12  
13  
14  
15  
16  
17  
18  
19  
20  
21  
22  
23  
24  
25  
26  
27  
28  
29  
30  
31  
32  
33  
34  
35  
36  
37  
38  
39  
40  
41  
42  
43  
44  
45  
46  
47  
48  
49  
50  
51  
52  
53  
54  
55  
56  
57  
58  
59  
60

**ACKNOWLEDGMENTS**

We are very grateful to Roberta Macci and Sandra Magliolo for their support in finding the cited articles and to Anna Kohn (Azienda Ospedaliera S.Camillo, Rome Italy) for her precious comments.

For peer review only



## FUNDING

This work was supported by the Regional Health Service, Lazio Region on the behalf of *P.Re.Val.E. Regional Outcome Evaluation Program. Lazio Region (Italy)*

<http://www.epidemiologia.lazio.it/prevale11/>

## AUTHOR'S CONTRIBUTION

All Authors participated in the study design, in defining the study protocol and methodology, in acquisition of data, in planning the analyses, in interpreting the results. M.S. performed the analyses. N.A and M.S. drafted the manuscript.

**REFERENCES**

1. Madigan D, Ryan P. What can we really learn from observational studies? The need for empirical assessment of methodology for active drug safety surveillance and comparative effectiveness research. *Epidemiology* 2011; 22: 629-31.
2. Mullins CD, Abdulhalim AM, Lavallee DC. Continuous patient engagement in comparative effectiveness research. *JAMA* 2012; 307:1587-8.
3. Agency for Health Care Research and Quality (AHRQ) – Effective Health Care Program. [www.effectivehealthcare.ahrq.gov](http://www.effectivehealthcare.ahrq.gov)
4. Fink AS, Campbell DA Jr, Mentzer RM Jr et al. The National Surgical Quality Improvement Program in non-veterans administration hospitals: initial demonstration of feasibility. *Ann Surg* 2002; 236: 344-53; discussion 353-4.
5. Fleetcroft R, Steel N, Cookson R et al. Incentive payments are not related to expected health gain in the pay for performance scheme for UK primary care: cross-sectional analysis. *BMC Health Serv Res* 2012; 12:94.
6. Hall SE, Holman CD, Finn J et al. Improving the evidence base for promoting quality and equity of surgical care using population-based linkage of administrative health records. *Int J Qual Health Care* 2005; 17: 415-420. Review.
7. Hanley JA, Dendukuri N. Efficient sampling approaches to address confounding in database studies. *Stat Methods Med Res* 2009; 18:81-105. Review.

- 1  
2  
3 8. Schneeweiss S. Developments in post-marketing comparative effectiveness research.  
4  
5 Clin Pharmacol Ther 2007; 82:143-56.. Review.  
6  
7  
8  
9  
10  
11  
12 9. Dolan JP, Diggs BS, Sheppard BC et al. The national mortality burden and significant  
13 factors associated with open and laparoscopic cholecystectomy: 1997-2006. J Gastrointest  
14 Surg 2009; 13:2292-2301.  
15  
16  
17  
18  
19  
20  
21  
22  
23 10. Fusco D, Barone AP, Sorge C et al. P.Re.Val.E.: Outcome research program for the  
24 evaluation of health care quality in Lazio, Italy. BMC Health Serv Res 2012; 12:25.  
25  
26  
27  
28  
29  
30 11. Pinnarelli L, Nuti S, Sorge C, et al. What drives hospital performance? The impact of  
31 comparative outcome evaluation of patients admitted for hip fracture in two Italian regions.  
32 BMJ Qual Saf 2012; 21: 127-34.  
33  
34  
35  
36  
37  
38 12. Keulemans YC, Venneman NG, Gouma DJ et al. New strategies for the treatment of  
39 gallstone disease. Scand J Gastroenterol Suppl 2002; 236:87-90. Review.  
40  
41  
42  
43  
44  
45 13. Williams EJ, Green J, Beckingham I et al. British Society of Gastroenterology -  
46 Guidelines on the management of common bile duct stones (CBDS).  
47 Gut 2008; 57:1004-21. Review.  
48  
49  
50  
51  
52  
53  
54 14. Varela JE, Wilson SE, Nguyen NT. Laparoscopic surgery significantly reduces surgical-  
55 site infections compared with open surgery. Surg Endosc 2010; 24: 270-276  
56  
57  
58  
59  
60

- 1  
2  
3 15. Nguyen NT, Hinojosa MW, Fayad C et al. Laparoscopic surgery is associated with a  
4 lower incidence of venous thromboembolism compared with open surgery. *Ann Surg* 2007;  
5 246: 1021-1027.  
6  
7  
8  
9  
10  
11 16. Dolan JP, Diggs BS, Sheppard BC, Hunter JG Ten-year trend in the national volume of  
12 bile duct injuries requiring operative repair. *Surg Endosc*. 2005; 19: 967-73..  
13  
14  
15  
16  
17 17. Flum DR, Cheadle A, Prela C, Dellinger EP, Chan L Bile duct injury during  
18 cholecystectomy and survival in medicare beneficiaries. *JAMA* 2003; 290:2168-73.  
19  
20  
21  
22  
23 18. Giger U, Ouaiissi M, Schmitz SF, Krähenbühl S, Krähenbühl L. Bile duct injury and use of  
24 cholangiography during laparoscopic cholecystectomy. *Br J Surg* 2011; 98:391-396.  
25  
26  
27  
28  
29 19. Ballal M, David G, Willmott S, Corless DJ et al. Conversion after laparoscopic  
30 cholecystectomy in England. *Surg Endosc* 2009; 23: 2338-2344.  
31  
32  
33  
34  
35 20. Quan H, Sundararajan V, Halfon P et al. Coding algorithms for defining comorbidities in  
36 ICD-9-CM and ICD-10 administrative data. *Med Care* 2005;43:1130-9.  
37  
38  
39  
40  
41  
42  
43  
44 21. Armitage JN, van der Meulen JH - Royal College of Surgeons Co-morbidity Consensus  
45 Group. Identifying co-morbidity in surgical patients using administrative data with the Royal  
46 College of Surgeons Charlson Score. *Br J Surg* 2010; 97:772-781.  
47  
48  
49  
50  
51  
52  
53 22. Yetkin G, Uludag M, Oba S et al. Laparoscopic cholecystectomy in elderly patients. *JSL*  
54 2009; 13:587-591.  
55  
56  
57  
58  
59  
60

1  
2  
3  
4  
5 23. Russ AJ, Obma KL, Rajamanickam V et al. Laparoscopy Improves Short-term Outcomes  
6 After Surgery for Diverticular Disease. *Gastroenterology* 2010; 138: 2267-2274.  
7  
8

9  
10  
11 24. Pessaux P, Tuech JJ, Derouet N et al. Laparoscopic cholecystectomy in the elderly: a  
12 prospective study. *Surg Endosc.* 2000; 14:1067-1069.  
13  
14

15  
16  
17 25. Kaafarani HM, Rosen AK. Using administrative data to identify surgical adverse events:  
18 an introduction to the Patient Safety Indicators. *Am J Surg* 2009; 198(5 Suppl):S63-S68  
19  
20  
21

22  
23  
24 26. Jhung MA, Banerjee SN. Administrative coding data and health care-associated  
25 infections. *Clin Infect Dis* 2009; 49:949-955. Review  
26  
27  
28

29  
30  
31 27. Arcà M, Fusco D, Barone AP et al. Risk adjustment and outcome research. Part I.  
32 *J Cardiovasc Med (Hagerstown)* 2006;7: 682-90.  
33  
34

35  
36  
37 28. D'Agostino RB. Tutorials in biostatistics. Propensity score methods for bias reduction in  
38 the comparison of a treatment to a non-randomized control group. *Statist Med* 1998; 17:2265-  
39 2281.  
40  
41  
42

43  
44  
45 29. Harvey Goldstein. *Multilevel statistical models.* 3rd Edition. 2003.  
46  
47  
48  
49  
50  
51  
52  
53  
54  
55  
56  
57  
58  
59  
60

30. Kim HO, Yun JW, Shin JH et al. Outcome of laparoscopic cholecystectomy is not  
influenced by chronological age in the elderly. *World J Gastroenterol* 2009; 15:722-726.

- 1  
2  
3  
4  
5 31. Rothman KJ, Lash TL, Greenland S. Modern Epidemiology 3<sup>rd</sup> edition, Publisher:  
6  
7 Lippincott Williams & Wilkins, 2008  
8  
9  
10  
11  
12 32. Glance LG, Dick AW, Osler TM et al. Accuracy of hospital report cards based on  
13  
14 administrative data. Health Serv Res 2006; 41(4 Pt 1):1413-1437  
15  
16  
17  
18 33. Shamiyeh A, Danis J, Wayand W et al. 14-year analysis of laparoscopic  
19  
20 cholecystectomy: conversion--when and why? Surg Laparosc Endosc Percutan Tech. 2007  
21  
22 ;17:271-6.  
23  
24  
25  
26  
27 34. Keus F, Gooszen HG, van Laarhoven CJ. Open, small-incision, or laparoscopic  
28  
29 cholecystectomy for patients with symptomatic cholecystolithiasis. An overview of Cochrane  
30  
31 Hepato-Biliary Group reviews. Cochrane Database Syst Rev 2010; (1):CD008318.  
32  
33  
34  
35  
36 35. Romy S, Eisenring MC, Bettschart V et al. Laparoscope use and surgical site infections in  
37  
38 digestive surgery. Ann Surg 2008; 247:627-632.  
39  
40  
41  
42  
43  
44  
45  
46  
47  
48  
49  
50  
51  
52  
53  
54  
55  
56  
57  
58  
59  
60

Figure 1. Selection of the study population

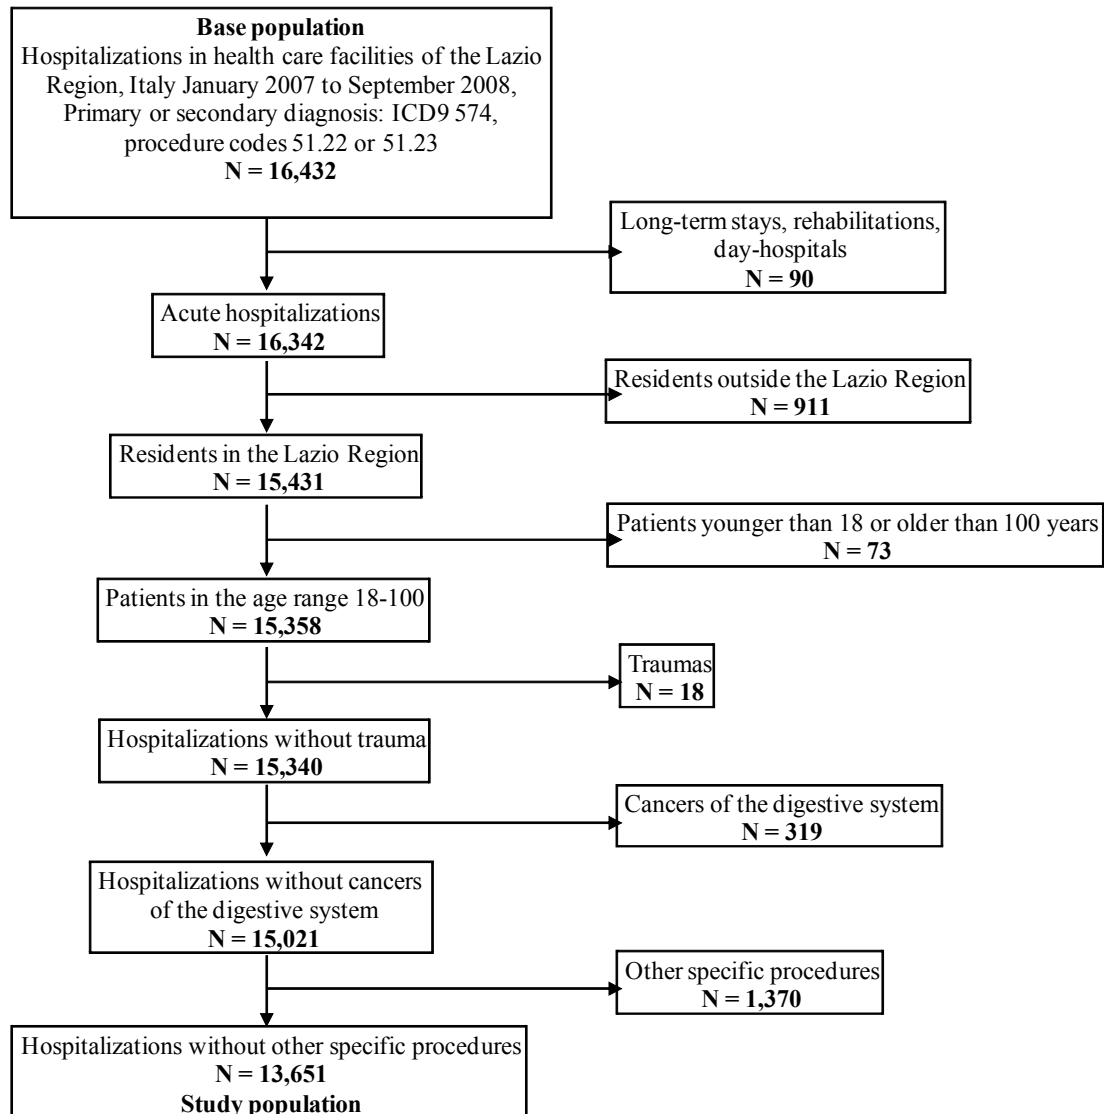

**Table 1.** Study population, overall and by cholecystectomy procedure: distribution by age, gender, severity of cholelithiasis, previous upper abdominal surgery, type of admission, comorbidities - Lazio Region, Italy, January 2007-September 2008

| Patient characteristics                 | Laparoscopic chole cystectomy            |             | Open chole cystectomy |             | Total         |              |      |
|-----------------------------------------|------------------------------------------|-------------|-----------------------|-------------|---------------|--------------|------|
|                                         | N                                        | %           | N                     | %           | N             | %            |      |
| <b>Total</b>                            | <b>11.752</b>                            | <b>86,1</b> | <b>1.899</b>          | <b>13,9</b> | <b>13.651</b> | <b>100,0</b> |      |
| <b>Age (years)</b>                      |                                          |             |                       |             |               |              |      |
|                                         | <70                                      | 9.913       | 84,4                  | 1.162       | 61,2          | 11.075       | 81,1 |
|                                         | 70-79                                    | 1.543       | 13,1                  | 485         | 25,5          | 2.028        | 14,9 |
|                                         | ≥ 80                                     | 296         | 2,5                   | 252         | 13,3          | 548          | 4,0  |
|                                         |                                          | 11.752      |                       |             |               |              |      |
| <b>Gender</b>                           |                                          |             |                       |             |               |              |      |
|                                         | Men                                      | 4.349       | 37,0                  | 979         | 51,6          | 5.328        | 39,0 |
|                                         | Women                                    | 7.403       | 63,0                  | 920         | 48,4          | 8.323        | 61,0 |
| <b>Severity of cholelithiasis</b>       |                                          |             |                       |             |               |              |      |
|                                         | Low                                      | 4.767       | 40,6                  | 470         | 24,7          | 5.237        | 38,4 |
|                                         | Moderate                                 | 6.456       | 54,9                  | 1.200       | 63,2          | 7.656        | 56,1 |
|                                         | High                                     | 529         | 4,5                   | 229         | 12,1          | 758          | 5,6  |
| <b>Previous upper abdominal surgery</b> |                                          |             |                       |             |               |              |      |
|                                         | No                                       | 11.714      | 99,7                  | 1.867       | 98,3          | 13.581       | 99,5 |
|                                         | Yes                                      | 38          | 0,3                   | 32          | 1,7           | 70           | 0,5  |
| <b>Type of admission</b>                |                                          |             |                       |             |               |              |      |
|                                         | Elective                                 | 8.690       | 73,9                  | 903         | 47,6          | 9.593        | 70,3 |
|                                         | Emergency                                | 3.062       | 26,1                  | 996         | 52,4          | 4.058        | 29,7 |
| <b>Comorbidities</b>                    |                                          |             |                       |             |               |              |      |
|                                         | Cancer                                   | 232         | 2,0                   | 75          | 3,9           | 307          | 2,2  |
|                                         | Diabetes                                 | 268         | 2,3                   | 100         | 5,3           | 368          | 2,7  |
|                                         | Obesity                                  | 115         | 1,0                   | 25          | 1,3           | 140          | 1,0  |
|                                         | Blood disease                            | 146         | 1,2                   | 62          | 3,3           | 208          | 1,5  |
|                                         | Hypertension                             | 842         | 7,2                   | 247         | 13,0          | 1.089        | 8,0  |
|                                         | Ischemic heart disease                   | 246         | 2,1                   | 107         | 5,6           | 353          | 2,6  |
|                                         | Past coronary revascularization          | 63          | 0,5                   | 22          | 1,2           | 85           | 0,6  |
|                                         | Heart failure                            | 47          | 0,4                   | 41          | 2,2           | 88           | 0,6  |
|                                         | Other heart disease                      | 158         | 1,3                   | 76          | 4,0           | 234          | 1,7  |
|                                         | Conduction disorders or dysrhythmia      | 250         | 2,1                   | 95          | 5,0           | 345          | 2,5  |
|                                         | Cerebrovascular disease                  | 146         | 1,2                   | 74          | 3,9           | 220          | 1,6  |
|                                         | Vascular disease                         | 91          | 0,8                   | 38          | 2,0           | 129          | 0,9  |
|                                         | COPD* or respiratory failure             | 189         | 1,6                   | 84          | 4,4           | 273          | 2,0  |
|                                         | Chronic nephropathy                      | 68          | 0,6                   | 46          | 2,4           | 114          | 0,8  |
|                                         | Chronic disease of the liver or pancreas | 219         | 1,9                   | 70          | 3,7           | 289          | 2,1  |

\*Chronic Obstructive Pulmonary Disease



Table 2. Factors related to the incidence of 30-day complications after cholecystectomy. OR crude and adjusted, p-values - Lazio Region, Italy, January 2007-September 2008 (N = 13,651)

| Patient characteristics                   | 30-day surgical-related complications (N=278, 2.0%) |                     |        |      |                   |        | 30-day systemic complications (N=280, 2.1%) |      |                     |        |      |                   |        |       |       |      |      |      |       |
|-------------------------------------------|-----------------------------------------------------|---------------------|--------|------|-------------------|--------|---------------------------------------------|------|---------------------|--------|------|-------------------|--------|-------|-------|------|------|------|-------|
|                                           | %                                                   | OR <sub>crude</sub> | 95% CI | p    | OR <sub>adj</sub> | 95% CI | p                                           | %    | OR <sub>crude</sub> | 95% CI | p    | OR <sub>adj</sub> | 95% CI | p     |       |      |      |      |       |
| Age (years)                               |                                                     |                     |        |      |                   |        |                                             |      |                     |        |      |                   |        |       |       |      |      |      |       |
|                                           | < 70                                                | 1.8                 | 1.00   | -    | -                 | -      | 1.00                                        | -    | -                   | -      | -    | 1.5               | 1.00   | -     | -     | -    |      |      |       |
|                                           | 70 - 79                                             | 2.9                 | 1.62   | 1.21 | 2.18              | 0.001  | 1.36                                        | 1.00 | 1.83                | 0.048  | 3.9  | 2.68              | 2.04   | 3.52  | 0.000 | 2.01 | 1.51 | 2.67 | 0.000 |
|                                           | ≥ 80                                                | 3.3                 | 1.84   | 1.13 | 3.00              | 0.015  | 1.21                                        | 0.72 | 2.03                | 0.475  | 7.1  | 5.13              | 3.58   | 7.36  | 0.000 | 2.79 | 1.87 | 4.14 | 0.000 |
| Gender                                    |                                                     |                     |        |      |                   |        |                                             |      |                     |        |      |                   |        |       |       |      |      |      |       |
|                                           | Men                                                 | 2.5                 | 1.00   | -    | -                 | -      | 1.00                                        | -    | -                   | -      | -    | 2.6               | 1.00   | -     | -     | -    | 1.00 | -    | -     |
|                                           | Women                                               | 1.7                 | 0.69   | 0.55 | 0.88              | 0.002  | 0.75                                        | 0.59 | 0.96                | 0.022  | 1.7  | 0.66              | 0.52   | 0.84  | 0.001 | 0.80 | 0.62 | 1.02 | 0.070 |
| Severity of cholelithiasis                |                                                     |                     |        |      |                   |        |                                             |      |                     |        |      |                   |        |       |       |      |      |      |       |
|                                           | Low                                                 | 1.9                 | 1.00   | -    | -                 | -      | 1.00                                        | -    | -                   | -      | -    | 1.2               | 1.00   | -     | -     | -    | 1.00 | -    | -     |
|                                           | Moderate                                            | 2.0                 | 1.08   | 0.84 | 1.40              | 0.538  | 0.96                                        | 0.74 | 1.24                | 0.733  | 2.2  | 1.84              | 1.38   | 2.46  | 0.000 | 1.55 | 1.15 | 2.08 | 0.004 |
|                                           | High                                                | 3.7                 | 2.03   | 1.32 | 3.14              | 0.001  | 1.43                                        | 0.91 | 2.24                | 0.122  | 6.2  | 5.30              | 3.59   | 7.83  | 0.000 | 3.40 | 2.26 | 5.11 | 0.000 |
| Previous upper abdominal surgery          |                                                     |                     |        |      |                   |        |                                             |      |                     |        |      |                   |        |       |       |      |      |      |       |
|                                           | No                                                  | 2.0                 | 1.00   | -    | -                 | -      | 1.00                                        | -    | -                   | -      | -    | 2.0               | 1.00   | -     | -     | -    | 1.00 | -    | -     |
|                                           | Yes                                                 | 5.7                 | 2.94   | 1.07 | 8.13              | 0.037  | 2.29                                        | 0.81 | 6.51                | 0.119  | 4.3  | 2.15              | 0.67   | 6.88  | 0.197 | 1.72 | 0.52 | 5.74 | 0.376 |
| Type of admission                         |                                                     |                     |        |      |                   |        |                                             |      |                     |        |      |                   |        |       |       |      |      |      |       |
|                                           | Elective                                            | 1.6                 | 1.00   | -    | -                 | -      | 1.00                                        | -    | -                   | -      | -    | 1.5               | 1.00   | -     | -     | -    | 1.00 | -    | -     |
|                                           | Emergency                                           | 3.0                 | 1.85   | 1.45 | 2.35              | 0.000  | 1.66                                        | 1.29 | 2.13                | 0.000  | 3.4  | 2.34              | 1.85   | 2.97  | 0.000 | 1.64 | 1.27 | 2.11 | 0.000 |
| Comorbidities (presence of the condition) |                                                     |                     |        |      |                   |        |                                             |      |                     |        |      |                   |        |       |       |      |      |      |       |
|                                           | Cancer                                              | 2.6                 | 1.30   | 0.64 | 2.64              | 0.476  | -                                           | -    | -                   | -      | 3.6  | 1.81              | 0.98   | 3.34  | 0.059 | -    | -    | -    | -     |
|                                           | Diabetes                                            | 3.3                 | 1.65   | 0.92 | 2.97              | 0.095  | -                                           | -    | -                   | -      | 4.4  | 2.24              | 1.34   | 3.75  | 0.002 | -    | -    | -    | -     |
|                                           | Obesity                                             | 5.0                 | 2.57   | 1.19 | 5.55              | 0.016  | 2.35                                        | 1.29 | 2.13                | 0.034  | 4.3  | 2.16              | 0.95   | 4.94  | 0.067 | -    | -    | -    | -     |
|                                           | Blood disease                                       | 5.8                 | 3.03   | 1.67 | 5.90              | 0.000  | 2.09                                        | 1.11 | 3.93                | 0.022  | 7.7  | 4.16              | 2.46   | 7.03  | 0.000 | 1.96 | 1.09 | 3.51 | 0.024 |
|                                           | Hypertension                                        | 2.9                 | 1.46   | 1.00 | 2.13              | 0.050  | -                                           | -    | -                   | -      | 4.0  | 2.20              | 1.58   | 3.05  | 0.000 | -    | -    | -    | -     |
|                                           | Ischemic heart disease                              | 2.8                 | 1.42   | 0.75 | 2.69              | 0.286  | -                                           | -    | -                   | -      | 7.4  | 4.08              | 2.69   | 6.20  | 0.000 | 1.74 | 1.09 | 2.78 | 0.020 |
|                                           | Past coronary revascularization                     | 2.4                 | 1.16   | 0.28 | 4.74              | 0.836  | -                                           | -    | -                   | -      | 9.4  | 5.08              | 2.43   | 10.62 | 0.000 | -    | -    | -    | -     |
|                                           | Heart failure                                       | 2.3                 | 1.12   | 0.27 | 4.57              | 0.875  | -                                           | -    | -                   | -      | 4.6  | 2.29              | 0.83   | 6.29  | 0.107 | -    | -    | -    | -     |
|                                           | Other heart disease                                 | 3.4                 | 1.72   | 0.84 | 3.52              | 0.136  | -                                           | -    | -                   | -      | 6.8  | 3.66              | 2.17   | 6.16  | 0.000 | -    | -    | -    | -     |
|                                           | Conduction disorder or dysrhythmia                  | 4.1                 | 2.09   | 1.21 | 3.62              | 0.008  | -                                           | -    | -                   | -      | 7.0  | 3.81              | 2.47   | 5.88  | 0.000 | 1.73 | 1.07 | 2.79 | 0.025 |
|                                           | Cerebrovascular disease                             | 5.9                 | 3.12   | 1.76 | 5.54              | 0.000  | 1.98                                        | 1.09 | 3.60                | 0.025  | 7.7  | 4.19              | 2.52   | 6.98  | 0.000 | -    | -    | -    | -     |
|                                           | Vascular disease                                    | 0.8                 | 0.37   | 0.05 | 2.68              | 0.328  | -                                           | -    | -                   | -      | 8.5  | 4.59              | 2.45   | 8.62  | 0.000 | -    | -    | -    | -     |
|                                           | COPD or respiratory failure                         | 2.6                 | 1.27   | 0.60 | 2.72              | 0.534  | -                                           | -    | -                   | -      | 7.7  | 4.22              | 2.66   | 6.70  | 0.000 | 2.02 | 1.23 | 3.31 | 0.006 |
|                                           | Chronic nephropathy                                 | 9.7                 | 5.31   | 2.82 | 10.00             | 0.000  | 3.24                                        | 1.65 | 6.36                | 0.001  | 10.5 | 5.82              | 3.16   | 10.72 | 0.000 | 2.27 | 1.15 | 4.46 | 0.018 |
|                                           | Chronic disease of the liver or pancreas            | 3.5                 | 1.75   | 0.92 | 3.33              | 0.087  | -                                           | -    | -                   | -      | 4.8  | 2.51              | 1.45   | 4.35  | 0.001 | 1.97 | 1.11 | 3.48 | 0.020 |

**Table 3.** Association between type of cholecystectomy and 30-day complications: OR and p-values from crude model, risk-adjusted model, and models with interaction with age group, severity of cholelithiasis, previous upper abdominal surgery and type of admission; p value of heterogeneity of the strata-specific estimates - Lazio Region, Italy, January 2007 - September 2008

|                                                            | %   | OR <sub>crude</sub> | 95% CI |      | p     | OR <sub>adj</sub> | 95% CI |       | p     | P <sub>het</sub> |
|------------------------------------------------------------|-----|---------------------|--------|------|-------|-------------------|--------|-------|-------|------------------|
| <u>30-day surgical-related complications: N=278, %=2.0</u> |     |                     |        |      |       |                   |        |       |       |                  |
| Open cholecystectomy                                       | 3,9 | 1,00                | -      | -    | -     | 1,00              | -      | -     | -     | -                |
| Laparoscopic cholecystectomy                               | 1,7 | 0,44                | 0,33   | 0,57 | 0,000 | 0,60              | 0,44   | 0,80  | 0,001 | -                |
| Age (years)                                                |     |                     |        |      |       |                   |        |       |       | 0,917            |
| < 70                                                       | 1,8 | 0,49                | 0,35   | 0,71 | 0,000 | 0,62              | 0,43   | 0,90  | 0,012 | -                |
| 70 - 79                                                    | 2,9 | 0,45                | 0,26   | 0,76 | 0,003 | 0,57              | 0,33   | 0,98  | 0,043 | -                |
| ≥ 80                                                       | 3,3 | 0,41                | 0,15   | 1,12 | 0,082 | 0,51              | 0,18   | 1,38  | 0,184 | -                |
| Severity of cholelithiasis                                 |     |                     |        |      |       |                   |        |       |       | 0,053            |
| Low                                                        | 1,9 | 0,37                | 0,22   | 0,61 | 0,000 | 0,46              | 0,28   | 0,77  | 0,003 | -                |
| Moderate                                                   | 2,0 | 0,58                | 0,40   | 0,85 | 0,005 | 0,78              | 0,53   | 1,16  | 0,224 | -                |
| High                                                       | 3,7 | 0,24                | 0,11   | 0,53 | 0,000 | 0,30              | 0,13   | 0,68  | 0,004 | -                |
| Previous upper abdominal surgery                           |     |                     |        |      |       |                   |        |       |       | 0,654            |
| No                                                         | 2,0 | 0,45                | 0,34   | 0,59 | 0,000 | 0,60              | 0,44   | 0,81  | 0,001 | -                |
| Yes                                                        | 5,7 | 0,26                | 0,03   | 2,64 | 0,256 | 0,36              | 0,03   | 3,69  | 0,388 | -                |
| Type of admission                                          |     |                     |        |      |       |                   |        |       |       | 0,001            |
| Elective                                                   | 1,6 | 0,32                | 0,22   | 0,46 | 0,000 | 0,37              | 0,25   | 0,55  | 0,000 | -                |
| Emergency                                                  | 3,0 | 0,76                | 0,51   | 1,13 | 0,178 | 0,94              | 0,62   | 1,42  | 0,764 | -                |
| <u>30-day systemic complications: N=280, %=2.1</u>         |     |                     |        |      |       |                   |        |       |       |                  |
| Open cholecystectomy                                       | 5,2 | 1,00                | -      | -    | -     | 1,00              | -      | -     | -     | -                |
| Laparoscopic cholecystectomy                               | 1,6 | 0,29                | 0,23   | 0,37 | 0,000 | 0,52              | 0,40   | 0,69  | 0,000 | -                |
| Age (years)                                                |     |                     |        |      |       |                   |        |       |       | 0,136            |
| < 70                                                       | 1,5 | 0,34                | 0,24   | 0,49 | 0,000 | 0,47              | 0,32   | 0,68  | 0,000 | -                |
| 70 - 79                                                    | 3,9 | 0,35                | 0,22   | 0,55 | 0,000 | 0,47              | 0,29   | 0,75  | 0,002 | -                |
| ≥ 80                                                       | 7,1 | 0,71                | 0,37   | 1,37 | 0,309 | 0,99              | 0,50   | 1,94  | 0,975 | -                |
| Severity of cholelithiasis                                 |     |                     |        |      |       |                   |        |       |       | 0,755            |
| Low                                                        | 1,2 | 0,29                | 0,16   | 0,51 | 0,000 | 0,43              | 0,24   | 0,77  | 0,005 | -                |
| Moderate                                                   | 2,2 | 0,34                | 0,25   | 0,47 | 0,000 | 0,55              | 0,39   | 0,77  | 0,001 | -                |
| High                                                       | 6,2 | 0,38                | 0,21   | 0,70 | 0,002 | 0,56              | 0,30   | 1,05  | 0,071 | -                |
| Previous upper abdominal surgery                           |     |                     |        |      |       |                   |        |       |       | 0,702            |
| No                                                         | 2,0 | 0,29                | 0,22   | 0,37 | 0,000 | 0,52              | 0,39   | 0,69  | 0,000 | -                |
| Yes                                                        | 4,3 | 0,41                | 0,04   | 4,69 | 0,470 | 0,86              | 0,07   | 10,40 | 0,905 | -                |
| Type of admission                                          |     |                     |        |      |       |                   |        |       |       | 0,545            |
| Elective                                                   | 1,5 | 0,33                | 0,23   | 0,50 | 0,000 | 0,48              | 0,32   | 0,72  | 0,000 | -                |
| Emergency                                                  | 3,4 | 0,35                | 0,25   | 0,49 | 0,000 | 0,56              | 0,39   | 0,81  | 0,002 | -                |

<sup>c</sup> There are no 30-day complications in patients with moderately high severity and undergoing laparotomic cholecystectomy

1

1  
2  
3  
4  
5  
6  
7 [4/12/12](#)

8 ~~The use of hospital discharge data to compare outcomes of different surgical techniques:~~  
9 ~~the example of cholecystectomy.~~

10 [Thirty-day complications after laparoscopic or open cholecystectomy: a population-](#)  
11 [based cohort study in Italy.](#)

#### 12 13 14 15 16 **Authors**

17 Nera Agabiti MD, Massimo Stafoggia MS, Marina Davoli MD PhD, Danilo Fusco MS, Anna  
18 Patrizia Barone MD and Carlo A.Perucci MD\*.

19 Department of Epidemiology, Regional Health Service, Lazio Region, Rome, Italy

20 \*National Agency for Regional Health Services, Rome, Italy

#### 21 22 23 24 25 26 27 **Correspondence**

28 Dott.ssa Nera Agabiti

29 Department of Epidemiology, Regional Health Service, Lazio Region

30 Via di S.Costanza 53

31 00198 Rome (Italy)

32 Tel 39-6-83060402

33 Fax 39-6-83060374

34 e:mail: [n.agabiti@deplazio.it](mailto:n.agabiti@deplazio.it)

Field Code Changed

35  
36  
37  
38  
39  
40  
41  
42  
43  
44 **Short running head:** Effectiveness of cholecystectomy

45 **Word count for abstract:** ~~293~~264

46 **Word count for manuscript:** ~~2888~~2886

1  
2  
3  
4  
5  
6  
7  
8  
9  
10  
11  
12  
13  
14  
15  
16  
17  
18  
19  
20  
21  
22  
23  
24  
25  
26  
27  
28  
29  
30  
31  
32  
33  
34  
35  
36  
37  
38  
39  
40  
41  
42  
43  
44  
45  
46  
47  
48  
49  
50  
51  
52  
53  
54  
55  
56  
57  
58  
59  
60

2

This work was supported by the Regional Health Service, Lazio Region on the behalf of P.Re.Val.E. Regional Outcome Evaluation Program. Lazio Region (Italy)

<http://www.epidemiologia.lazio.it/prevale11/>

Field Code Changed

~~The use of hospital discharge data to compare outcomes of different surgical techniques: the example of cholecystectomy.~~

For peer review only

3

**Thirty-day complications after laparoscopic or open cholecystectomy: a population-based cohort study in Italy.**

Formatted: Left, Line spacing: single

Formatted: English (U.S.)

**Abstract**

**Objective**

The objective of the study is to evaluate short-term complications after laparoscopic (LC) or open cholecystectomy (OC) in patients with gallstones by using linked hospital discharge data. There is an increasing interest in using routinely collected health data to support large-scale effectiveness evaluation of different treatment options. We evaluated short term outcomes after laparoscopic cholecystectomy (LC) or open cholecystectomy (OC) in gallstones using hospital discharge data.

**Design**

Population-based cohort study.

**Setting**

Data were obtained from the Regional Hospital Discharge Registry Lazio Region in Central Italy (around 5 million inhabitants) in 2007-2008.

**Participants**

All patients admitted to hospitals of Lazio with symptomatic gallstones (ICD9-CM = 574) who underwent LC (ICD9-CM 51.23) or OC (ICD9-CM 51.22).

**Outcome measures**

1) "30-day surgical-related complications" defined as any complication of the biliary tract (including bile duct injury, bile leak, postoperative bleeding, wound infection, cholecystitis injury post-operative infection, hemorrhage or hematoma or seroma complicating a procedure, persistent postoperative fistula, perforation of bile duct, disruption of wound); 2) "30-day systemic complications" defined as any complications of other organs (including

sepsis, infections from other organs, major cardiovascular events and selected adverse events).

## Results

13,651 patients were included; 86.1% had LC, 13.9% OC. 2.0% experienced surgical-related complications (SRC), 2.1% systemic complications (SC). The Odds Ratio (OR) of complications after LC versus OC was 0.60 ( $p<0.001$ ) for SRC and 0.52 ( $p<0.001$ ) for SC. As regards SRC, the advantage of LC was consistent across age categories, severity of gallstones and previous upper abdominal surgery, while there was no advantage among people with emergency admission (OR=0.94,  $p = 0.764$ ). For SC, no significant advantage of LC was seen among very old people (OR=0.99,  $p=0.975$ ) and among those with previous upper abdominal surgery (OR=0.86,  $p=0.905$ ).

## Conclusions

This large observational study confirms that LC is more effective than OC with respect to 30-day short term complications. ~~The advantage remains in sub-populations with higher preoperative risk, but it is different according to whether the complications affect the biliary tract or other organs or systems.~~ Population-based linkage of administrative datasets can enlarge evidence of treatment benefits in clinical practice.

**Key words:** ~~administrative data, cholecystectomy, complications, effectiveness, outcomes~~  
administrative data, cohort study, effectiveness, gallstones, hospital discharge data, laparoscopic cholecystectomy, open cholecystectomy, outcomes, population-based, post-operative complications.

Formatted: English (U.S.)

## Article summary

### Article focus

-The advantage of laparoscopic cholecystectomy (LC) approach for the treatment of gallstone versus open surgery (OC) has been ~~shown from RCTs and observational studies, but the evidence from observational studies is limited.~~

-The use of linked administrative health records has become one of the most powerful tools in observational studies aimed at comparing treatments.

-We compared laparoscopic and open cholecystectomy in term of ~~30-day complications short-term outcomes~~ using routinely collected databases in Lazio Region (Italy).

### Key messages

-This population-based study contributes to enlarge the evidence on effectiveness of LC in a real-life setting.

-As regards surgical-related complications, the advantage of LC was consistent across age categories, severity of gallstones and previous upper abdominal surgery, while there was no advantage among people with emergency admission.

-For systemic complications, no significant advantage of LC was seen among very old people and among those with previous upper abdominal surgery.

### Strengths and limitations

-Population-based design, 30-day outcomes, large numbers and robustness of analytic procedures are the main strengths.

-It contributes to the debate on the complex methodology to estimated risk of adverse events after surgery using secondary databases to monitor quality of care.

1  
2  
3  
4  
5  
6  
7  
8  
9  
10  
11  
12  
13  
14  
15  
16  
17  
18  
19  
20  
21  
22  
23  
24  
25  
26  
27  
28  
29  
30  
31  
32  
33  
34  
35  
36  
37  
38  
39  
40  
41  
42  
43  
44  
45  
46  
47  
48  
49  
50  
51  
52  
53  
54  
55  
56  
57  
58  
59  
60

6

-The use of ICD-9-CM codes in the definition of severity of disease presentation and of complications is a major limit.

For peer review only

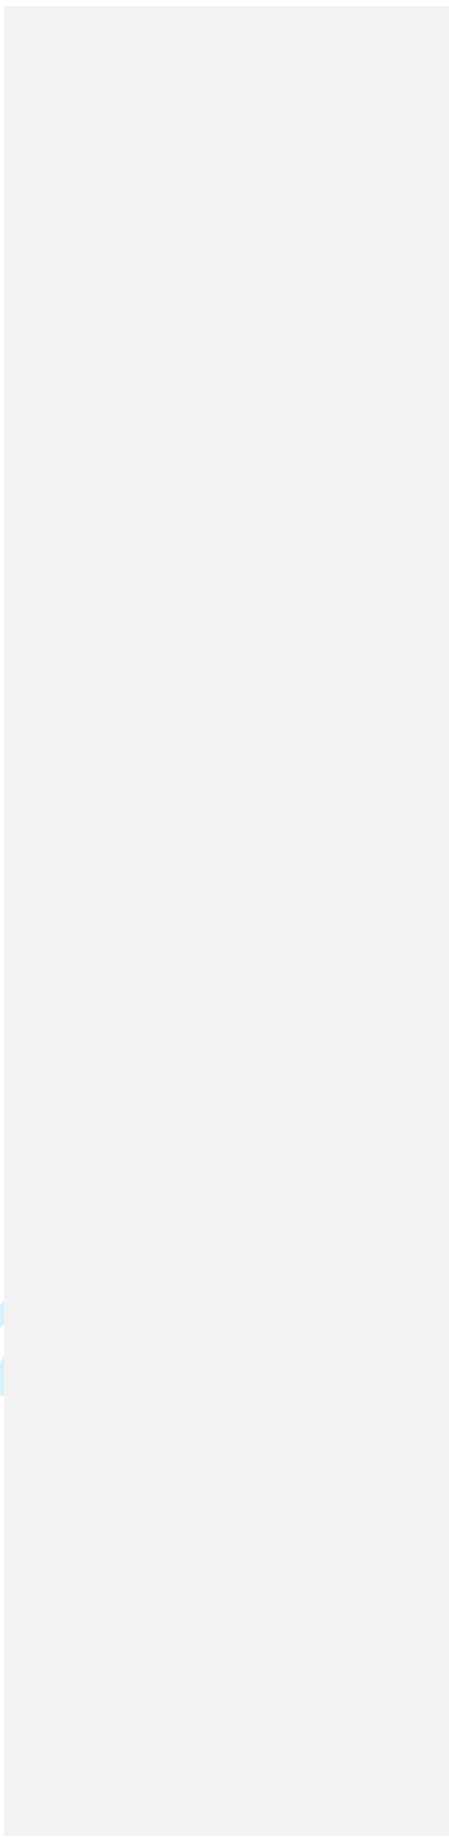



## Introduction

Comparative effectiveness research (CER) is becoming central to monitor real-life impact of treatments and support public health decisions (1, 2). Although the basic concept of comparing therapies is not new, over the last few years many initiatives have been implemented in ~~several~~many countries to provide large-scale evidence on benefits and harms of different treatments (3-5). The use of linked administrative health records has become one of the most powerful tools in observational studies aimed at comparing treatments (6,7). They include hospital in-patients records, birth and death registrations, outpatient care records, dispensed pharmacy drugs (6-9). ~~Despite the advantages due to the large numbers and the population level coverage, the analytic methods to reduce bias in CER studies are complex and new approaches are continuously developed (8,9).~~

In the Lazio Region (around 5.000.000 inhabitants) the P.Re.Val.E. Project (*Regional Program for Assessing the Outcomes of Health-care Interventions*) was launched in 2005. Its aims are: to measure the quality of health care provided in the Lazio Region, to describe variability of care provision across institutions and populations and to compare effectiveness of treatments for different medical and surgical conditions (10,-11). Over 60 outcomes indicators are calculated based on data obtained from record-linkage procedures of different health systems. The results are periodically updated and publicly disseminated with discussion on critical methodological points.

Cholecystectomy is one of the most common abdominal surgical procedures in developed countries. Since its introduction in the late '80s, laparoscopic cholecystectomy (LC) has replaced open cholecystectomy (OC) as the treatment of choice for symptomatic gallstones (12, 13). ~~Although~~ Beneficial effects of LC have been widely demonstrated ~~in~~, there are

1  
2  
3  
4  
5  
6  
7 relatively few studies showing the advantages from real-life settings using secondary  
8 databases (9,14-19,14-16). In the present study, we aimed at developing a methodology to  
9 measure short-term complications after LC or OC using large administrative databases on  
10 behalf of the P.Re.Val.E. Secondly, we tested the hypothesis that the advantages of LC versus  
11 OC could vary according to age demographic and clinical patients' characteristics.  
12  
13  
14  
15  
16  
17  
18  
19  
20  
21

## 22 **Methods**

### 23 Source of data

24  
25  
26 Data was derived from the Lazio Hospital Information System (HIS), which provides  
27 information on patients' demographic data (gender, age, place of birth, place of residence),  
28 admission and discharge dates, discharge diagnoses (up to 6) and medical procedures or  
29 surgical interventions ((up to 6) according to the International Classification of disease, Ninth  
30 Revision, Clinical Modification (ICD-9-CM), status at discharge (alive, dead, transferred to  
31 another hospital), ward(s) of stay, date(s) of in-hospital transfer, and a regional code  
32 corresponding to the admitting facility for patients discharged from all public and private  
33 hospital of the Lazio Region (5.759.839 inhabitants).  
34  
35  
36  
37  
38  
39  
40  
41  
42

### 43 Study population

44  
45 All hospital admissions with a primary or secondary diagnosis of gallstones (International  
46 Classification of Diseases 9<sup>th</sup> Revision, Clinical Modification - ICD9-CM = 574) and a  
47 procedure code of cholecystectomy (ICD9-CM 51.22, 51.23), occurred in private and public  
48 hospitals of the Lazio Region between January 2007 and September 2008 were included, for a  
49 total of 16,432 cases (age 18+ years). [We a priori decided not to include codes for partial](#)  
50  
51  
52  
53  
54  
55  
56  
57  
58  
59  
60

[cholecystectomy \(ICD-9-CM 51.21 and 51.24\) to increase the specificity of our exposure.](#)

Information was retrieved from the HIS. In order to increase the case specificity, several exclusion criteria were applied including long-term hospitalizations, rehabilitations, day-hospitals, hospitalizations for delivery or trauma or cancer, hospitalizations with abdominal surgical procedures other than cholecystectomy. The final population consisted of 13,651 subjects (**Figure 1**). See the online **Supplementary Data** (Part 1) for details on the exclusion criteria and ICD9-CM codes.

#### Patient-level risk factors

The following characteristics were considered for each patient: Age (<70; 70-79; >=80 years old); Gender; Severity of gallstones: it was classified as *low* (not-complicated), *moderate* (presence of cholecystitis ~~or; cholangitis or~~ biliary tract obstruction), and *high* (presence of both inflammation and obstruction of the biliary tract); Previous upper abdominal surgery (based on previous 2-year hospitalizations); Comorbidities (based on previous 2-year hospitalizations) following validated algorithms ([20,21+7-19](#)); Type of admission: either *elective* or *emergency*. See the online **Supplementary Data** (Part 2-4) for details on the ICD-9-CM codes. The choice of *cut off* for age category was based on previous studies to distinguish adult and old people ([22-24+22](#)).

#### Outcomes

We identified various complications within 30-days after the intervention and grouped them in two categories: 1) “30-day surgical-related complications” defined as any complication of the biliary tract ([including post-operative infection, hemorrhage or hematoma or seroma complicating a procedure, persistent postoperative fistula, perforation of bile duct, disruption of wound](#) ~~(including bile duct injury, bile leak, postoperative bleeding, wound infection,~~

1  
2  
3  
4  
5  
6  
7 [cholecystitis injury](#)); 2) “30-day systemic complications” defined as any complications of other  
8 organs (including sepsis, infections from other organs, major cardiovascular events and  
9 selected adverse events). The complete list of complications with ICD-9-CM codes is  
10 reported in the online **Supplementary Data** (Part 5). Among the various complications we  
11 included some conditions reported in the list of Patient Safety Indicators recently developed  
12 by the Agency for Health Care Research and Quality (~~i.e. postoperative bleeding, wound~~  
13 ~~infection~~), while other items were specifically created on the basis of scientific literature on  
14 digestive surgery (14-196,25-263,24). Depending on the type of complication, some ICD9-  
15 CM codes were searched in both the index admission and the following ones in the 30-day  
16 period after the surgery, others were searched only in later hospitalizations. For example,  
17 peritonitis or acute pancreatitis was not counted as complications when reported in the index  
18 admission. See the online **Supplementary Data** (Part 5) for details on the ICD9-CM codes.  
19  
20 In the case of a subsequent hospitalization occurred out of the study area (for example, in a  
21 region other than Lazio), we obtained information through record linkage procedure between  
22 hospital information systems. Because of the short follow up time, this happened in a minimal  
23 proportion of cases (0.1%). The outcome variables were: “30-day surgical-related  
24 complications” and “30-day systemic complications”; they were coded “1” if at least one of  
25 the complications within the group was present and “0” if none was recorded.  
26  
27  
28  
29  
30  
31  
32  
33  
34  
35  
36  
37  
38  
39  
40  
41  
42

#### 43 Type of cholecystectomy

44  
45 As exposure ~~We defined the~~ variable we defined “type of cholecystectomy” (laparoscopic  
46 cholecystectomy, LC vs. open cholecystectomy, OC). In the case of ICD-9-CM codes for  
47 both LC and OC (5%), the patient was considered exposed to the open surgical  
48 procedure. ~~Since Unfortunately, the~~ We could not use the -specific ICD-9-code for a case  
49 converted from LC to OC (ICD-9-CM code V 64.41) because it was ~~was~~ highly under-  
50  
51  
52  
53  
54  
55  
56  
57  
58  
59  
60

1  
2  
3  
4  
5  
6  
7  
8  
9  
10  
11  
12  
13  
14  
15  
16  
17  
18  
19  
20  
21  
22  
23  
24  
25  
26  
27  
28  
29  
30  
31  
32  
33  
34  
35  
36  
37  
38  
39  
40  
41  
42  
43  
44  
45  
46  
47  
48  
49  
50  
51  
52  
53  
54  
55  
56  
57  
58  
59  
60

~~reported in our Region in the study period. no case in our study cohort, not available, in the case of reported ICD-9 CM codes for both LC and OC (5%), the patient was considered exposed to the open surgical procedure.~~

#### Statistical analysis

Multiple logistic regression models were fitted to estimate the relative risk of 30-day complications (either “surgical-related” or “systemic”) after LC versus OC, adjusting for demographical and clinical risk factors. The two outcome variables were analysed separately.

~~The predictive model was made of two sets of predictors: Given the large amount of individual level variables available, the risk factors were divided in two groups: 1) variables “a priori” chosen as confounders (age, gender, severity of gallstones, previous upper abdominal surgery, and type of admission); 2) variables empirically tested (comorbidities) which were selected using iterative stepwise statistical procedures (9,275). Once the “best” predictive model was identified for each of the two outcome variables, the treatment variable “type of cholecystectomy” was included, and the adjusted odds ratio (OR) of LC versus open surgery was estimated, with corresponding 95% confidence interval (95% CI) and p-value.~~

In order to test the hypothesis of an effect modification by age, relative risk estimates for the age groups were derived by adding an interaction term between the age group and the treatment variable in the final multivariate logistic model. We obtained the OR of laparoscopic vs. open surgery within each age stratum by adding the corresponding interaction terms coefficients. ~~This was accomplished by adding the coefficient from the reference category and that from the age stratum of interest, and by computing the corresponding standard error from the corresponding terms of the variance-covariance matrix.~~

Similarly, effect modification was tested with regard to severity of cholelithiasis, previous

1  
2  
3  
4  
5  
6  
7 upper abdominal surgery and type of admission. The corresponding tests of heterogeneity of  
8 the stratum-specific risk estimates were computed, ~~but not reported for ease of presentation.~~  
9

10  
11  
12 Sensitivity analyses were performed. First, in order to guarantee adequate control of  
13 confounding factors we identified and adjusted for all the individual factors associated with  
14 the treatment, within the propensity adjustment framework (286). This procedure is a two-step  
15 technique: 1. it estimates the a priori probability of exposure for each subject, based on  
16 clinical and demographic characteristics; 2. it standardizes for them in the association between  
17 treatment and the study outcome. The individual factors related to the exposure in the present  
18 study include age, gender, severity of cholelithiasis, previous upper abdominal surgery, type of  
19 admission, cardio-circulatory disease, cerebrovascular disease, COPD or respiratory failure,  
20 chronic nephropathy, chronic disease of the liver or pancreas. Second, to take into account the  
21 potential heterogeneous experience in laparoscopic surgery across different hospitals because  
22 of the patients' clustering within a single institution we perform a multilevel regression model  
23 with random intercepts for hospitals (297).  
24  
25  
26  
27  
28  
29  
30  
31  
32  
33  
34  
35

36  
37 All the statistical analyses were performed using SAS Software version 8.0 (SAS Institute,  
38 Inc. SAS/STAT software).  
39  
40  
41  
42  
43  
44

## 45 Results

46  
47 A description of the study population, overall and by cholecystectomy procedure, is presented  
48 in **Table 1**. Over 80% of the patients were younger than 70 years, and moderate to high  
49 severity of the gallstones was diagnosed for 61.7%. As compared with patients undergoing  
50 LC, those who underwent OC were more likely to be elderly, males, with a more sever  
51  
52  
53  
54  
55  
56  
57  
58  
59  
60

1  
2  
3  
4  
5  
6  
7 baseline disease and more chronic conditions. Furthermore, they were operated in emergency  
8 in most of the cases (52.4%), whereas LC was performed in elective hospitalizations much  
9 more frequently (73.9%).  
10  
11

12  
13  
14 **Table 2** reports the relationship between demographic and clinical variables and the  
15 occurrence of complications. The adjusted risk of systemic complications increased with age  
16 and was much higher in patients with more severe baseline gallstones, whereas no clear age or  
17 severity-related differences in risk emerged with regard to surgical-related 30-day  
18 complications, once other co-factors were taken into account. Women were less likely to  
19 experience both types of complications. Having had a previous intervention on the upper  
20 digestive system seemed to enhance the risk of both surgical-related and systemic  
21 complications, though results are not statistically significant due to small power. Finally, the  
22 risk of both types of complications was more evident in emergency as opposed to scheduled  
23 interventions. Surgical-related complications were higher among subjects with obesity, blood  
24 disease, stroke or chronic nephropathy, whereas systemic complications were associated with  
25 blood diseases, ischemic heart disease, conduction disorders or dysrhythmias, COPD or  
26 respiratory failure, chronic nephropathy, and chronic diseases of the liver or pancreas.  
27  
28  
29  
30  
31  
32  
33  
34  
35  
36  
37  
38  
39  
40

41 **Table 3** shows the relationship between type of cholecystectomy and outcomes, adjusted for  
42 the risk factors identified in Table 2. We report results of the advantage of LC vs. OC (OR,  
43 95% CI) in the cohort (~~first lines of the table~~) and in the each stratum of the variables tested in  
44 the models with interaction terms. The incidence of “30-day surgical-related complications”  
45 and “30-day systemic complications” was 2.0% and 2.1%, respectively. ~~The incidence of “at  
46 least one 30-day complication” was 3%.~~ The odds ratio of surgical related complications for  
47  
48  
49  
50  
51  
52  
53  
54  
55  
56  
57  
58  
59  
60

patients who underwent LC as compared to patients with OC was 0.60 ( $p<0.001$ ). The corresponding figure for systemic complications was 0.52 ( $p<0.001$ ).

As regards 30-day surgical-related complications, the protective effect of LC vs. OC was consistent across the age category, severity of cholelithiasis and previous upper abdominal surgery, while among people with emergency admission there was no advantage (OR=0.94  $p = 0.764$ ). Similarly, for systemic complications, the superiority of LC vs. OC was consistent regardless level of cholelithiasis severity, and elective/emergency admission, but for those 80+ yrs aged people there was no advantage of LC vs. OC (OR 0.99,  $p = 0.975$ ); also for patients with previous upper abdominal surgery there was a much weaker advantage (OR=0.86,  $p=0.905$ ).

When the association between type of cholecystectomy and [30-day complications](#)~~short term complications~~ was adjusted with the propensity adjustment method, results were consistent with those obtained with the risk-adjustment procedure (LC vs. OC OR= 0.61 and OR=0.52 respectively for the two outcomes). Finally, results were similar taking into account patients' clustering within different hospitals (*data not shown*).

## Discussion

From this large observational study based on linked administrative health records - taking into account the disomogeneous distribution of factors related to the probability to be offered open surgery - people who end up having a LC have a better short-term prognosis than those that get an OC for the treatment of gallstones. The superiority of laparoscopic approach in term of [30-day complications](#)~~short term outcomes~~ is consistent in [different age categories](#).



1  
2  
3  
4  
5  
6  
7 ~~both genders~~, different severity in disease presentation and past history of upper abdominal  
8 surgery.  
9

10  
11  
12 This population-based study contributes to enlarge the evidence on effectiveness of LC in a  
13 real-life setting ~~by providing an example-contribution from the Southern Europe area.~~ It  
14 supports the usefulness of observational approaches. ~~The 30-day outcomes linked to~~  
15 ~~admission represents one strength of this study. - To our knowledge it is the first study in Italy~~  
16 ~~to measure and compare outcomes of surgical treatments using data from secondary data~~  
17 ~~sources.~~ Despite RTCs are considered the optimal study design when comparing efficacy of  
18 treatments, observational studies provide a picture of treatment under usual circumstances of  
19 health-care practice and can answer to the question “*Does it work in practice?*” (3,86,3).  
20  
21  
22  
23  
24  
25  
26  
27  
28  
29  
30  
31  
32  
33  
34  
35  
36  
37  
38  
39  
40  
41  
42  
43  
44  
45  
46  
47  
48  
49  
50  
51  
52  
53  
54  
55  
56  
57  
58  
59  
60  
RTCs often have small sample size and may under represent vulnerable patient groups,  
including elderly patients with multiple comorbidities, children, and young women, and  
operate in a highly controlled environment that is far from routine clinical practice. Our study  
supports that LC is a reliable approach safer than OC not only in old age group - confirming  
previous findings (229, 3028) - but also in presence of severe disease presentation and in  
patients with past history of upper digestive system surgery. Beneficial effect of LC as  
regards systemic complications tends to be lower in 80+ yrs aged in comparison with younger  
ages, and in patients with emergency admission in comparison to elective admissions as  
regards 30-day surgical-related complications. These data add to the evidence on the complex  
relationship between age and outcomes after surgery (22-24,300-22, 28).

A number of potential biases are present. First of all, people in the two groups of patients  
analyzed are not homogenous with a higher frequency of elderly and more severe patients in  
the open group than in the laparoscopic one. When comparing the effect of the two techniques

1  
2  
3  
4  
5  
6  
7 using two different populations, the so called “indication bias” may affect study validity  
8  
9 ([8,316,29](#)). To limit this problem we run the propensity adjustment analysis to take into  
10  
11 account the different distribution of factors strongly associated with the probability to receive  
12  
13 open surgery in the study population. This analytical approach confirmed the advantage of  
14  
15 laparoscopic vs. open surgery obtained in the main logistic regression analysis. Another  
16  
17 critical point is the potential different distribution of laparoscopic experience across surgeons;  
18  
19 however a sensitivity analysis which took into account this point led to similar results. The  
20  
21 use of ICD-9-CM codes in the definition of severity of disease presentation and of  
22  
23 complications is another major limit. Discharge abstract data have little insight into clinical  
24  
25 details and do not inform on the temporal relationship of the clinical conditions and processes,  
26  
27 then defining complications is a difficult task ([320](#)). In this respect, we tried to improve the  
28  
29 accuracy of our measures both 1) applying a specific coding algorithm with subsequent  
30  
31 hospital admissions used to retrieve adverse events and 2) excluding in the “count” of  
32  
33 complications specific items if reported in the index only (i.e. peritonitis) because of the  
34  
35 difficulty to determine if it was already present at admission. Moreover, we cannot exclude an  
36  
37 under-notification of complications – ~~another~~ [major limit of our source of data](#) - but it is  
38  
39 unlikely that is influenced by the type of surgery. Another major problem is the potential  
40  
41 misclassification of exposure since we were not able to measure the occurrence of conversion  
42  
43 of LC to OC. The number of people that were switched from LC to OP is low in comparison  
44  
45 to figures documented in other studies and it may represent a severe source of bias in our  
46  
47 study ([30,3328,34](#)).

48  
49 Beneficial effects of the laparoscopic approach versus traditional open surgery for the  
50  
51 treatment of gallstones come from various randomized controlled trials (RCTs) ([342](#)). They  
52  
53 found significant shorter hospital stay and quicker convalescence associated with LC but no  
54  
55  
56  
57  
58  
59  
60

1  
2  
3  
4  
5  
6  
7 differences in mortality, complications and operative time between the two procedures. A  
8 better trend with the laparoscopic approach, including morbidity and mortality, comes from  
9 ~~some~~ observational studies. From a surveillance system in eight Swiss hospitals, surgical site  
10 infections were less common in laparoscopic approach in comparison to traditional open  
11 surgery (0.5% in LC vs. 1.8% in OC) (353). Significantly lower incidence of venous  
12 thromboembolism and surgical site-infections in laparoscopic cases versus open cases was  
13 ~~recently~~ observed in a large administrative dataset-based study in USA (14, 15). [National](#)  
14 [estimates for LC in USA showed an increase in LC from 52% in 1991 to 75% in 2000 with a](#)  
15 [constantly low mortality rate \(mean 0.45%\) and a decrease in biliary reconstruction rate over](#)  
16 [time \(from 0.25% in 1992 to 0.09% in 1999\) \(16\). On the basis of the 1997-2006 trend](#)  
17 [analysis by the same authors](#) ~~In hospital mortality after cholecystectomy over a ten years~~  
18 ~~period was studied in USA:~~ LC was associated with a low mortality rate (mean value in the  
19 period: 0.52%) while OC with a significantly higher rate (corresponding value: 4.9%) (946).  
20 [In a retrospective study using Medicare beneficiaries common bile duct \(CBD\) injury during](#)  
21 [cholecystectomy was associated with a significant higher risk of death in comparison to](#)  
22 [cholecystectomy without CBD injury over a 9.2 year follow up period \(17\). From a -Swiss](#)  
23 [1995-2005 hospital database analysis the incidence rate of bile duct injury after LC was 0.3%](#)  
24 [and did not change over time \(18\). In the era of evidence based health care, population based](#)  
25 [linkage of administrative health data have been increasingly used also in the field of surgery.](#)  
26 ~~However the methodology is not standardized and estimated risk of adverse events vary~~  
27 ~~widely according to the type of interventions and to the type of complications and their~~  
28 ~~operative definition. As a recent example in Europe,~~ the incidence of conversion to OC after  
29 LC in all hospitals in England from 2005 to 2006 has been examined using Hospital Episode  
30 Statistics and resulted 4.6% for elective procedures and 9.4% for emergency procedures)  
31 (1934). ~~In USA, a set of indicators (Patient Safety Indicators (PSIs) has been introduced,~~

~~validated and continuously under revision as algorithms based on the International Classification of Diseases, Ninth Revision, Clinical Modification (17). Our study contributes to the experience in using population based linked health data and ICD 9 CM coding algorithms to compare treatment outcomes.~~

Population-based linkage of routinely collected health data represents a precious tool to support large- scale and real-world practice evaluation by measuring specific outcomes and comparing them over time and across populations. Together with results from experimental research settings, the conclusions of research studies evaluating clinical outcomes through data linkage systems should be successfully incorporated into practice by clinicians/surgeons.

## ACKNOWLEDGMENTS

We are very grateful to Roberta Macci and Sandra Magliolo for their support in finding the cited articles and to Anna Kohn (Azienda Ospedaliera S.Camillo, Rome Italy) for her precious comments.

For peer review only

1  
2  
3  
4  
5  
6  
7  
8  
9  
10  
11  
12  
13  
14  
15  
16  
17  
18  
19  
20  
21  
22  
23  
24  
25  
26  
27  
28  
29  
30  
31  
32  
33  
34  
35  
36  
37  
38  
39  
40  
41  
42  
43  
44  
45  
46  
47  
48  
49  
50  
51  
52  
53  
54  
55  
56  
57  
58  
59  
60

20

**FUNDING**

This work was supported by the Regional Health Service, Lazio Region on the behalf of *P.Re.Val.E. Regional Outcome Evaluation Program. Lazio Region (Italy)*  
<http://www.epidemiologia.lazio.it/prevale11/>

Field Code Changed

**AUTHOR'S CONTRIBUTION**

All Authors participated in the study design, in defining the study protocol and methodology, in acquisition of data, in planning the analyses, in interpreting the results. M.S. performed the analyses. N.A and M.S. drafted the manuscript.

For peer review only

**REFERENCES**

1. Madigan D, Ryan P. What can we really learn from observational studies?: the need for empirical assessment of methodology for active drug safety surveillance and comparative effectiveness research. *Epidemiology* 2011; 22: 629-31.

2. Mullins CD, Abdulhalim AM, Lavalley DC. Continuous patient engagement in comparative effectiveness research. *JAMA* 2012; 307:1587-8.

3. Agency for Health Care Research and Quality (AHRQ) – Effective Health Care Program.

[www.effectivehealthcare.ahrq.gov](http://www.effectivehealthcare.ahrq.gov)

Field Code Changed

4. Fink AS, Campbell DA Jr, Mentzer RM Jr et al. The National Surgical Quality Improvement Program in non-veterans administration hospitals: initial demonstration of feasibility. *Ann Surg* 2002; 236: 344-53; discussion 353-4.

5. Fleetcroft R, Steel N, Cookson R et al. Incentive payments are not related to expected health gain in the pay for performance scheme for UK primary care: cross-sectional analysis. *BMC Health Serv Res* 2012; 12:94.

6. Hall SE, Holman CD, Finn J et al. Improving the evidence base for promoting quality and equity of surgical care using population-based linkage of administrative health records. *Int J Qual Health Care* 2005; 17: 415-420. Review.

7. Hanley JA, Dendukuri N. Efficient sampling approaches to address confounding in database studies. *Stat Methods Med Res*. 2009 Feb; 18(1):81-105. Review.

1  
2  
3  
4  
5  
6  
7 [86. Schneeweiss S. Developments in post-marketing comparative effectiveness research.](#)  
8 Clin Pharmacol Ther 2007; 82:143-56. [Epub 2007 Jun 6.](#) Review.

9  
10  
11  
12 [7. Hall SE, Holman CD, Finn J et al. Improving the evidence base for promoting quality and](#)  
13 [equity of surgical care using population based linkage of administrative health records.](#) Int J  
14 [Qual Health Care 2005; 17: 415-420.](#) [Epub 2005 May 9.](#) Review.

15  
16  
17  
18  
19  
20 [9. Dolan JP, Diggs BS, Sheppard BC et al. The national mortality burden and significant](#)  
21 [factors associated with open and laparoscopic cholecystectomy: 1997-2006.](#) J Gastrointest  
22 [Surg 2009; 13:2292-2301.](#)

Formatted: English (U.S.)

23  
24  
25  
26  
27  
28 [8. Hanley JA, Dendukuri N. Efficient sampling approaches to address confounding in](#)  
29 [database studies.](#) Stat Methods Med Res. 2009 Feb;18(1):81-105. [Epub 2008 Sep 24.](#) Review.

30  
31  
32  
33 [9. Kansagara D, Englander H, Salanitro A et al. Risk prediction models for hospital](#)  
34 [readmission: a systematic review.](#) JAMA 2011 19; 306:1688-98.

35  
36  
37  
38  
39  
40  
41  
42  
43  
44  
45  
46  
47  
48  
49  
50  
51  
52  
53  
54  
55  
56  
57  
58  
59  
60

10. Fusco D, Barone AP, Sorge C et al. P.Re.Val.E.: Outcome research program for the  
evaluation of health care quality in Lazio, Italy. BMC Health Serv Res 2012-27; 12:25-25.

11. ~~11~~ Pinnarelli L, Nuti S, Sorge C, et al. What drives hospital performance? The impact of  
comparative outcome evaluation of patients admitted for hip fracture in two Italian regions.  
BMJ Qual Saf 2012; 21: 127-34. [Epub 2011 Oct 19.](#)

Formatted: Italian (Italy)



12. Keulemans YC, Venneman NG, Gouma DJ et al. New strategies for the treatment of gallstone disease. Scand J Gastroenterol Suppl 2002; 236:87-90. Review.

13. Williams EJ, Green J, Beckingham I et al. British Society of Gastroenterology - Guidelines on the management of common bile duct stones (CBDS). Gut 2008; 57:1004-21. ~~Epub 2008 Mar 5.~~ Review.

14. Varela JE, Wilson SE, Nguyen NT. Laparoscopic surgery significantly reduces surgical-site infections compared with open surgery. Surg Endosc 2010; 24: 270-276. ~~Epub 2009 Jun 17.~~

15. Nguyen NT, Hinojosa MW, Fayad C et al. Laparoscopic surgery is associated with a lower incidence of venous thromboembolism compared with open surgery. Ann Surg 2007; 246:1021-1027.

16. ~~Dolan JP, Diggs BS, Sheppard BC, Hunter JG Ten-year trend in the national volume of bile duct injuries requiring operative repair. Surg Endosc. 2005 Jul;19(7):967-73. Epub 2005 May 12.~~

~~Dolan JP, Diggs BS, Sheppard BC et al. The national mortality burden and significant factors associated with open and laparoscopic cholecystectomy: 1997-2006. J Gastrointest Surg 2009; 13:2292-2301. Epub 2009 Sep 2.~~

17. ~~Flum DR, Cheadle A, Prella C, Dellinger EP, Chan L Bile duct injury during cholecystectomy and survival in medicare beneficiaries. - JAMA 2003; 290:2168-73.~~

Formatted: English (U.S.)

1  
2  
3  
4  
5  
6  
7 [18. Giger U, Ouaisi M, Schmitz SF, Krähenbühl S, Krähenbühl L.](#)

Formatted: English (U.S.)

8 [Bile duct injury and use of cholangiography during laparoscopic cholecystectomy. Br J Surg.](#)  
9  
10 [2011; 98:391-396.](#)

11  
12  
13  
14 ~~17. Quan H, Sundararajan V, Halfon P et al. Coding algorithms for defining comorbidities in~~  
15 ~~ICD-9-CM and ICD-10 administrative data. Med Care; 2005;43:1130-9.~~

16  
17  
18  
19  
20 ~~18. Agabiti N, Picciotto S, Cesaroni G et al. The influence of socioeconomic status on~~  
21 ~~utilization and outcomes of elective total hip replacement: a multicity population based~~  
22 ~~longitudinal study. Int J Qual Health Care. 2007;19:37-44.~~

23  
24  
25  
26  
27  
28 [19. Ballal M, David G, Willmott S, Corless DJ et al. Conversion after laparoscopic](#)  
29 [cholecystectomy in England. Surg Endosc 2009; 23:2338-2344.](#)

30  
31  
32  
33  
34 [20. Quan H, Sundararajan V, Halfon P et al. Coding algorithms for defining comorbidities in](#)  
35 [ICD-9-CM and ICD-10 administrative data. Med Care; 2005;43:1130-9.](#)

36  
37  
38  
39 ~~21~~9. Armitage JN, van der Meulen JH - Royal College of Surgeons Co-morbidity  
40 Consensus Group. Identifying co-morbidity in surgical patients using administrative data with  
41 the Royal College of Surgeons Charlson Score. Br J Surg 2010; 97:772-781.

42  
43  
44  
45  
46  
47 [22](#)0. Yetkin G, Uludag M, Oba S et al. Laparoscopic cholecystectomy in elderly patients.  
48 JSLS 2009; 13:587-591.

234. Russ AJ, Obama KL, Rajamanickam V et al. Laparoscopy Improves Short-term Outcomes After Surgery for Diverticular Disease. *Gastroenterology* 2010 ~~Feb 26~~; 138: 2267-2274. ~~[Epub ahead of print]~~

242. Pessaux P, Tuech JJ, Derouet N et al. Laparoscopic cholecystectomy in the elderly: a prospective study. *Surg Endosc*. 2000 ~~Nov~~; 14(11):1067-1069.

253. Kaafarani HM, Rosen AK. Using administrative data to identify surgical adverse events: an introduction to the Patient Safety Indicators. *Am J Surg* 2009; 198(5 Suppl):S63-S68

264. Jhung MA, Banerjee SN. Administrative coding data and health care-associated infections. *Clin Infect Dis* 2009; 49:949-955. Review

275. Arcà M, Fusco D, Barone AP et al. Risk adjustment and outcome research. Part I. *J Cardiovasc Med (Hagerstown)*. 2006 ~~Sep~~; 7(9):682-90.

286. D'Agostino RB. Tutorials in biostatistics. Propensity score methods for bias reduction in the comparison of a treatment to a non-randomized control group. *Statist Med* 1998; 17:2265-2281

297. Harvey Goldstein. *Multilevel statistical models*. 3rd Edition. 2003. Oxford University Press Inc., New York, NY10016

3028. Kim HO, Yun JW, Shin JH et al. Outcome of laparoscopic cholecystectomy is not influenced by chronological age in the elderly. *World J Gastroenterol* 2009; 15:722-726.

1  
2  
3  
4  
5  
6  
7  
8  
9  
10  
11  
12  
13  
14  
15  
16  
17  
18  
19  
20  
21  
22  
23  
24  
25  
26  
27  
28  
29  
30  
31  
32  
33  
34  
35  
36  
37  
38  
39  
40  
41  
42  
43  
44  
45  
46  
47  
48  
49  
50  
51  
52  
53  
54  
55  
56  
57  
58  
59  
60

[3129](#). Rothman KJ, Lash TL, Greenland S. Modern Epidemiology 3<sup>rd</sup> edition, Publisher: Lippincott Williams & Wilkins, 2008

[320](#). Glance LG, Dick AW, Osler TM et al. Accuracy of hospital report cards based on administrative data. Health Serv Res 2006; 41(4 Pt 1):1413-1437

[334](#). Shamiyeh A, Danis J, Wayand W et al. 14-year analysis of laparoscopic cholecystectomy: conversion--when and why? Surg Laparosc Endosc Percutan Tech. 2007 Aug;17(4):271-6.

[342](#). Keus F, Gooszen HG, van Laarhoven CJ. Open, small-incision, or laparoscopic cholecystectomy for patients with symptomatic cholelithiasis. An overview of Cochrane Hepato-Biliary Group reviews. Cochrane Database Syst Rev 2010; (1):CD008318.

[353](#). Romy S, Eisenring MC, Bettschart V et al. Laparoscope use and surgical site infections in digestive surgery. Ann Surg 2008; 247:627-632.

~~[34](#). Ballal M, David G, Willmott S, Corless DJ et al. Conversion after laparoscopic cholecystectomy in England. Surg Endosc 2009; 23:2338-2344. Epub 2009 Mar 6.~~

**Table 1.** Study population, overall and by cholecystectomy procedure: distribution by age, gender, severity of cholelithiasis, previous upper abdominal surgery, type of admission, comorbidities - Lazio Region, Italy, January 2007-September 2008

| Patient characteristics                   | Laparoscopic cholecystectomy |             | Open cholecystectomy |             | Total         |              |
|-------------------------------------------|------------------------------|-------------|----------------------|-------------|---------------|--------------|
|                                           | No.                          | %           | No.                  | %           | No.           | %            |
| <b>Total</b>                              | <b>11.752</b>                | <b>86,1</b> | <b>1.899</b>         | <b>13,9</b> | <b>13.651</b> | <b>100,0</b> |
| Age (years)                               |                              |             |                      |             |               |              |
| < 70                                      | 9.913                        | 84,4        | 1.162                | 61,2        | 11.075        | 81,1         |
| 70 - 79                                   | 1.543                        | 13,1        | 485                  | 25,5        | 2.028         | 14,9         |
| ≥ 80                                      | 296                          | 2,5         | 252                  | 13,3        | 548           | 4,0          |
| Gender                                    |                              |             |                      |             |               |              |
| Men                                       | 4.349                        | 37,0        | 979                  | 51,6        | 5.328         | 39,0         |
| Women                                     | 7.403                        | 63,0        | 920                  | 48,4        | 8.323         | 61,0         |
| Severity of cholelithiasis                |                              |             |                      |             |               |              |
| Low                                       | 4.767                        | 40,6        | 470                  | 24,7        | 5.237         | 38,4         |
| Moderate                                  | 6.473                        | 55,1        | 1.210                | 63,7        | 7.683         | 56,3         |
| High                                      | 512                          | 4,4         | 219                  | 11,5        | 731           | 5,4          |
| Previous upper abdominal surgery          |                              |             |                      |             |               |              |
| No                                        | 11.714                       | 99,7        | 1.867                | 98,3        | 13.581        | 99,5         |
| Yes                                       | 38                           | 0,3         | 32                   | 1,7         | 70            | 0,5          |
| Type of admission                         |                              |             |                      |             |               |              |
| Elective                                  | 8.690                        | 73,9        | 903                  | 47,6        | 9.593         | 70,3         |
| Emergency                                 | 3.062                        | 26,1        | 996                  | 52,4        | 4.058         | 29,7         |
| Comorbidities (presence of the condition) |                              |             |                      |             |               |              |
| Cancer                                    | 232                          | 2,0         | 75                   | 3,9         | 307           | 2,2          |
| Diabetes                                  | 268                          | 2,3         | 100                  | 5,3         | 368           | 2,7          |
| Obesity                                   | 115                          | 1,0         | 25                   | 1,3         | 140           | 1,0          |
| Blood disease                             | 146                          | 1,2         | 62                   | 3,3         | 208           | 1,5          |
| Hypertension                              | 842                          | 7,2         | 247                  | 13,0        | 1.089         | 8,0          |
| Ischemic heart disease                    | 246                          | 2,1         | 107                  | 5,6         | 353           | 2,6          |
| Past coronary revascularization           | 63                           | 0,5         | 22                   | 1,2         | 85            | 0,6          |
| Heart failure                             | 47                           | 0,4         | 41                   | 2,2         | 88            | 0,6          |
| Other heart disease                       | 158                          | 1,3         | 76                   | 4,0         | 234           | 1,7          |
| Conduction disorder or dysrhythmia        | 250                          | 2,1         | 95                   | 5,0         | 345           | 2,5          |
| Cerebrovascular disease                   | 146                          | 1,2         | 74                   | 3,9         | 220           | 1,6          |
| Vascular disease                          | 91                           | 0,8         | 38                   | 2,0         | 129           | 0,9          |
| COPD or respiratory failure               | 189                          | 1,6         | 84                   | 4,4         | 273           | 2,0          |
| Chronic nephropathy                       | 68                           | 0,6         | 46                   | 2,4         | 114           | 0,8          |
| Chronic disease of the liver or pancreas  | 219                          | 1,9         | 70                   | 3,7         | 289           | 2,1          |

**Table 2. Factors related to the incidence of 30-day complications after cholecystectomy. OR crude and adjusted, p-values - Lazio Region, Italy, January 2007-September 2008 (N = 13,651)**

| Patient characteristics                   | 30-day surgical-related complications (N=278, 2.0%) |                     |      |                   |      | 30-day systemic complications (N=280, 2.1%) |                     |      |                   |      |       |
|-------------------------------------------|-----------------------------------------------------|---------------------|------|-------------------|------|---------------------------------------------|---------------------|------|-------------------|------|-------|
|                                           | %                                                   | OR <sub>crude</sub> | p    | OR <sub>adj</sub> | p    | %                                           | OR <sub>crude</sub> | p    | OR <sub>adj</sub> | p    |       |
| Age (years)                               |                                                     |                     |      |                   |      |                                             |                     |      |                   |      |       |
|                                           | < 70                                                | 1,8                 | 1,00 | -                 | 1,00 | -                                           | 1,5                 | 1,00 | -                 | 1,00 | -     |
|                                           | 70 - 79                                             | 2,9                 | 1,62 | 0,001             | 1,36 | 0,048                                       | 3,9                 | 2,68 | 0,000             | 2,01 | 0,000 |
|                                           | ≥ 80                                                | 3,3                 | 1,84 | 0,015             | 1,21 | 0,475                                       | 7,1                 | 5,13 | 0,000             | 2,79 | 0,000 |
| Gender                                    |                                                     |                     |      |                   |      |                                             |                     |      |                   |      |       |
|                                           | Men                                                 | 2,5                 | 1,00 | -                 | 1,00 | -                                           | 2,6                 | 1,00 | -                 | 1,00 | -     |
|                                           | Women                                               | 1,7                 | 0,69 | 0,002             | 0,75 | 0,022                                       | 1,7                 | 0,66 | 0,001             | 0,80 | 0,070 |
| Severity of cholelithiasis                |                                                     |                     |      |                   |      |                                             |                     |      |                   |      |       |
|                                           | Low                                                 | 1,9                 | 1,00 | -                 | 1,00 | -                                           | 1,2                 | 1,00 | -                 | 1,00 | -     |
|                                           | Moderate                                            | 2,0                 | 1,08 | 0,538             | 0,96 | 0,733                                       | 2,2                 | 1,84 | 0,000             | 1,55 | 0,004 |
|                                           | High                                                | 3,7                 | 2,03 | 0,001             | 1,43 | 0,122                                       | 6,2                 | 5,30 | 0,000             | 3,40 | 0,000 |
| Previous upper abdominal surgery          |                                                     |                     |      |                   |      |                                             |                     |      |                   |      |       |
|                                           | No                                                  | 2,0                 | 1,00 | -                 | 1,00 | -                                           | 2,0                 | 1,00 | -                 | 1,00 | -     |
|                                           | Yes                                                 | 5,7                 | 2,94 | 0,037             | 2,29 | 0,119                                       | 4,3                 | 2,15 | 0,197             | 1,72 | 0,376 |
| Type of admission                         |                                                     |                     |      |                   |      |                                             |                     |      |                   |      |       |
|                                           | Elective                                            | 1,6                 | 1,00 | -                 | 1,00 | -                                           | 1,5                 | 1,00 | -                 | 1,00 | -     |
|                                           | Emergency                                           | 3,0                 | 1,85 | 0,000             | 1,66 | 0,000                                       | 3,4                 | 2,34 | 0,000             | 1,64 | 0,000 |
| Comorbidities (presence of the condition) |                                                     |                     |      |                   |      |                                             |                     |      |                   |      |       |
|                                           | Cancer                                              | 2,6                 | 1,30 | 0,476             | -    | -                                           | 3,6                 | 1,81 | 0,059             | -    | -     |
|                                           | Diabetes                                            | 3,3                 | 1,65 | 0,095             | -    | -                                           | 4,4                 | 2,24 | 0,002             | -    | -     |
|                                           | Obesity                                             | 5,0                 | 2,57 | 0,016             | 2,35 | 0,034                                       | 4,3                 | 2,16 | 0,067             | -    | -     |
|                                           | Blood disease                                       | 5,8                 | 3,03 | 0,000             | 2,09 | 0,022                                       | 7,7                 | 4,16 | 0,000             | 1,96 | 0,024 |
|                                           | Hypertension                                        | 2,9                 | 1,46 | 0,050             | -    | -                                           | 4,0                 | 2,20 | 0,000             | -    | -     |
|                                           | Ischemic heart disease                              | 2,8                 | 1,42 | 0,286             | -    | -                                           | 7,4                 | 4,08 | 0,000             | 1,74 | 0,020 |
|                                           | Past coronary revascularization                     | 2,4                 | 1,16 | 0,836             | -    | -                                           | 9,4                 | 5,08 | 0,000             | -    | -     |
|                                           | Heart failure                                       | 2,3                 | 1,12 | 0,875             | -    | -                                           | 4,6                 | 2,29 | 0,107             | -    | -     |
|                                           | Other heart disease                                 | 3,4                 | 1,72 | 0,136             | -    | -                                           | 6,8                 | 3,66 | 0,000             | -    | -     |
|                                           | Conduction disorder or dysrhythmia                  | 4,1                 | 2,09 | 0,008             | -    | -                                           | 7,0                 | 3,81 | 0,000             | 1,73 | 0,025 |
|                                           | Cerebrovascular disease                             | 5,9                 | 3,12 | 0,000             | 1,98 | 0,025                                       | 7,7                 | 4,19 | 0,000             | -    | -     |
|                                           | Vascular disease                                    | 0,8                 | 0,37 | 0,328             | -    | -                                           | 8,5                 | 4,59 | 0,000             | -    | -     |
|                                           | COPD or respiratory failure                         | 2,6                 | 1,27 | 0,534             | -    | -                                           | 7,7                 | 4,22 | 0,000             | 2,02 | 0,006 |
|                                           | Chronic nephropathy                                 | 9,7                 | 5,31 | 0,000             | 3,24 | 0,001                                       | 10,5                | 5,82 | 0,000             | 2,27 | 0,018 |
|                                           | Chronic disease of the liver or pancreas            | 3,5                 | 1,75 | 0,087             | -    | -                                           | 4,8                 | 2,51 | 0,001             | 1,97 | 0,020 |

Formatted Table

**Table 3.** Association between type of cholecystectomy and 30-day complications: OR and p-values from crude model, risk-adjusted model, and models with interaction with age group, severity of cholelithiasis, previous upper abdominal surgery and type of admission - Lazio Region, Italy, January 2007 - September 2008

|                                            | 30-day surgical-related complications<br>(N=278, %=2.0) |                     |       |                   |       | 30-day systemic complications<br>(N=280, %=2.1) |                     |       |                   |       |
|--------------------------------------------|---------------------------------------------------------|---------------------|-------|-------------------|-------|-------------------------------------------------|---------------------|-------|-------------------|-------|
|                                            | %                                                       | OR <sub>crude</sub> | p     | OR <sub>adj</sub> | p     | %                                               | OR <sub>crude</sub> | p     | OR <sub>adj</sub> | p     |
| Open cholecystectomy                       | 3,9                                                     | 1,00                | -     | 1,00              | -     | 5,2                                             | 1,00                | -     | 1,00              | -     |
| Laparoscopic cholecystectomy               | 1,7                                                     | 0,44                | 0,000 | 0,60              | 0,001 | 1,6                                             | 0,29                | 0,000 | 0,52              | 0,000 |
| <i>Stratified results by each category</i> |                                                         |                     |       |                   |       |                                                 |                     |       |                   |       |
| <i>Age (years)</i>                         |                                                         |                     |       |                   |       |                                                 |                     |       |                   |       |
| < 70                                       | 1,8                                                     | 0,49                | 0,000 | 0,62              | 0,012 | 1,5                                             | 0,34                | 0,000 | 0,47              | 0,000 |
| 70 - 79                                    | 2,9                                                     | 0,45                | 0,003 | 0,57              | 0,043 | 3,9                                             | 0,35                | 0,000 | 0,47              | 0,002 |
| ≥ 80                                       | 3,3                                                     | 0,41                | 0,082 | 0,51              | 0,184 | 7,1                                             | 0,71                | 0,309 | 0,99              | 0,975 |
| <i>Severity of cholelithiasis</i>          |                                                         |                     |       |                   |       |                                                 |                     |       |                   |       |
| Low                                        | 1,9                                                     | 0,37                | 0,000 | 0,46              | 0,003 | 1,2                                             | 0,29                | 0,000 | 0,43              | 0,005 |
| Moderate                                   | 2,0                                                     | 0,58                | 0,005 | 0,78              | 0,224 | 2,2                                             | 0,34                | 0,000 | 0,55              | 0,001 |
| High                                       | 3,7                                                     | 0,24                | 0,000 | 0,30              | 0,004 | 6,2                                             | 0,38                | 0,002 | 0,56              | 0,071 |
| <i>Previous upper abdominal surgery</i>    |                                                         |                     |       |                   |       |                                                 |                     |       |                   |       |
| No                                         | 2,0                                                     | 0,47                | 0,000 | 0,60              | 0,001 | 2,0                                             | 0,29                | 0,000 | 0,52              | 0,000 |
| Yes                                        | 5,7                                                     | 0,26                | 0,256 | 0,36              | 0,388 | 4,3                                             | 0,41                | 0,470 | 0,86              | 0,905 |
| <i>Type of admission</i>                   |                                                         |                     |       |                   |       |                                                 |                     |       |                   |       |
| Elective                                   | 1,6                                                     | 0,31                | 0,000 | 0,37              | 0,000 | 1,5                                             | 0,33                | 0,000 | 0,48              | 0,000 |
| Emergency                                  | 3,0                                                     | 0,76                | 0,178 | 0,94              | 0,764 | 3,4                                             | 0,35                | 0,000 | 0,56              | 0,002 |

**Table 1.** Study population, overall and by cholecystectomy procedure: distribution by age, gender, severity of cholelithiasis, previous upper abdominal surgery, type of admission, comorbidities - Lazio Region, Italy, January 2007-September 2008

| Patient characteristics                  | Laparoscopic cholecystectomy |             | Open cholecystectomy |             | Total         |              |
|------------------------------------------|------------------------------|-------------|----------------------|-------------|---------------|--------------|
|                                          | N                            | %           | N                    | %           | N             | %            |
| <b>Total</b>                             | <b>11.752</b>                | <b>86,1</b> | <b>1.899</b>         | <b>13,9</b> | <b>13.651</b> | <b>100,0</b> |
| <b>Age (years)</b>                       |                              |             |                      |             |               |              |
| <70                                      | 9.913                        | 84,4        | 1.162                | 61,2        | 11.075        | 81,1         |
| 70-79                                    | 1.543                        | 13,1        | 485                  | 25,5        | 2.028         | 14,9         |
| ≥ 80                                     | 296                          | 2,5         | 252                  | 13,3        | 548           | 4,0          |
|                                          | 11.752                       |             |                      |             |               |              |
| <b>Gender</b>                            |                              |             |                      |             |               |              |
| Men                                      | 4.349                        | 37,0        | 979                  | 51,6        | 5.328         | 39,0         |
| Women                                    | 7.403                        | 63,0        | 920                  | 48,4        | 8.323         | 61,0         |
| <b>Severity of cholelithiasis</b>        |                              |             |                      |             |               |              |
| Low                                      | 4.767                        | 40,6        | 470                  | 24,7        | 5.237         | 38,4         |
| Moderate                                 | 6.456                        | 54,9        | 1.200                | 63,2        | 7.656         | 56,1         |
| High                                     | 529                          | 4,5         | 229                  | 12,1        | 758           | 5,6          |
| <b>Previous upper abdominal surgery</b>  |                              |             |                      |             |               |              |
| No                                       | 11.714                       | 99,7        | 1.867                | 98,3        | 13.581        | 99,5         |
| Yes                                      | 38                           | 0,3         | 32                   | 1,7         | 70            | 0,5          |
| <b>Type of admission</b>                 |                              |             |                      |             |               |              |
| Elective                                 | 8.690                        | 73,9        | 903                  | 47,6        | 9.593         | 70,3         |
| Emergency                                | 3.062                        | 26,1        | 996                  | 52,4        | 4.058         | 29,7         |
| <b>Comorbidities</b>                     |                              |             |                      |             |               |              |
| Cancer                                   | 232                          | 2,0         | 75                   | 3,9         | 307           | 2,2          |
| Diabetes                                 | 268                          | 2,3         | 100                  | 5,3         | 368           | 2,7          |
| Obesity                                  | 115                          | 1,0         | 25                   | 1,3         | 140           | 1,0          |
| Blood disease                            | 146                          | 1,2         | 62                   | 3,3         | 208           | 1,5          |
| Hypertension                             | 842                          | 7,2         | 247                  | 13,0        | 1.089         | 8,0          |
| Ischemic heart disease                   | 246                          | 2,1         | 107                  | 5,6         | 353           | 2,6          |
| Past coronary revascularization          | 63                           | 0,5         | 22                   | 1,2         | 85            | 0,6          |
| Heart failure                            | 47                           | 0,4         | 41                   | 2,2         | 88            | 0,6          |
| Other heart disease                      | 158                          | 1,3         | 76                   | 4,0         | 234           | 1,7          |
| Conduction disorders or dysrhythmia      | 250                          | 2,1         | 95                   | 5,0         | 345           | 2,5          |
| Cerebrovascular disease                  | 146                          | 1,2         | 74                   | 3,9         | 220           | 1,6          |
| Vascular disease                         | 91                           | 0,8         | 38                   | 2,0         | 129           | 0,9          |
| COPD* or respiratory failure             | 189                          | 1,6         | 84                   | 4,4         | 273           | 2,0          |
| Chronic nephropathy                      | 68                           | 0,6         | 46                   | 2,4         | 114           | 0,8          |
| Chronic disease of the liver or pancreas | 219                          | 1,9         | 70                   | 3,7         | 289           | 2,1          |

\*Chronic Obstructive Pulmonary Disease



Table 2. Factors related to the incidence of 30-day complications after cholecystectomy. OR crude and adjusted, p-values - Lazio Region, Italy, January 2007-September 2008 (N = 13,651)

| Patient characteristics                   | 30-day surgical-related complications (N=278, 2.0%) |                     |        |      |                   |        | 30-day systemic complications (N=280, 2.1%) |      |                     |        |       |                   |        |       |       |       |      |      |       |
|-------------------------------------------|-----------------------------------------------------|---------------------|--------|------|-------------------|--------|---------------------------------------------|------|---------------------|--------|-------|-------------------|--------|-------|-------|-------|------|------|-------|
|                                           | %                                                   | OR <sub>crude</sub> | 95% CI | p    | OR <sub>adj</sub> | 95% CI | p                                           | %    | OR <sub>crude</sub> | 95% CI | p     | OR <sub>adj</sub> | 95% CI | p     |       |       |      |      |       |
| Age (years)                               |                                                     |                     |        |      |                   |        |                                             |      |                     |        |       |                   |        |       |       |       |      |      |       |
|                                           | < 70                                                | 1.8                 | 1.00   | -    | -                 | 1.00   | -                                           | 1.5  | 1.00                | -      | -     | 1.00              | -      | -     |       |       |      |      |       |
|                                           | 70 - 79                                             | 2.9                 | 1.62   | 1.21 | 2.18              | 0.001  | 1.36                                        | 1.00 | 1.83                | 0.048  | 3.9   | 2.68              | 2.04   | 3.52  | 0.000 | 2.01  | 1.51 | 2.67 | 0.000 |
|                                           | ≥ 80                                                | 3.3                 | 1.84   | 1.13 | 3.00              | 0.015  | 1.21                                        | 0.72 | 2.03                | 0.475  | 7.1   | 5.13              | 3.58   | 7.36  | 0.000 | 2.79  | 1.87 | 4.14 | 0.000 |
| Gender                                    |                                                     |                     |        |      |                   |        |                                             |      |                     |        |       |                   |        |       |       |       |      |      |       |
|                                           | Men                                                 | 2.5                 | 1.00   | -    | -                 | 1.00   | -                                           | 2.6  | 1.00                | -      | -     | 1.00              | -      | -     |       |       |      |      |       |
|                                           | Women                                               | 1.7                 | 0.69   | 0.55 | 0.88              | 0.002  | 0.75                                        | 0.59 | 0.96                | 0.022  | 1.7   | 0.66              | 0.52   | 0.84  | 0.001 | 0.80  | 0.62 | 1.02 | 0.070 |
| Severity of cholelithiasis                |                                                     |                     |        |      |                   |        |                                             |      |                     |        |       |                   |        |       |       |       |      |      |       |
|                                           | Low                                                 | 1.9                 | 1.00   | -    | -                 | 1.00   | -                                           | 1.2  | 1.00                | -      | -     | 1.00              | -      | -     |       |       |      |      |       |
|                                           | Moderate                                            | 2.0                 | 1.08   | 0.84 | 1.40              | 0.538  | 0.96                                        | 0.74 | 1.24                | 0.733  | 2.2   | 1.84              | 1.38   | 2.46  | 0.000 | 1.55  | 1.15 | 2.08 | 0.004 |
|                                           | High                                                | 3.7                 | 2.03   | 1.32 | 3.14              | 0.001  | 1.43                                        | 0.91 | 2.24                | 0.122  | 6.2   | 5.30              | 3.59   | 7.83  | 0.000 | 3.40  | 2.26 | 5.11 | 0.000 |
| Previous upper abdominal surgery          |                                                     |                     |        |      |                   |        |                                             |      |                     |        |       |                   |        |       |       |       |      |      |       |
|                                           | No                                                  | 2.0                 | 1.00   | -    | -                 | 1.00   | -                                           | 2.0  | 1.00                | -      | -     | 1.00              | -      | -     |       |       |      |      |       |
|                                           | Yes                                                 | 5.7                 | 2.94   | 1.07 | 8.13              | 0.037  | 2.29                                        | 0.81 | 6.51                | 0.119  | 4.3   | 2.15              | 0.67   | 6.88  | 0.197 | 1.72  | 0.52 | 5.74 | 0.376 |
| Type of admission                         |                                                     |                     |        |      |                   |        |                                             |      |                     |        |       |                   |        |       |       |       |      |      |       |
|                                           | Elective                                            | 1.6                 | 1.00   | -    | -                 | 1.00   | -                                           | 1.5  | 1.00                | -      | -     | 1.00              | -      | -     |       |       |      |      |       |
|                                           | Emergency                                           | 3.0                 | 1.85   | 1.45 | 2.35              | 0.000  | 1.66                                        | 1.29 | 2.13                | 0.000  | 3.4   | 2.34              | 1.85   | 2.97  | 0.000 | 1.64  | 1.27 | 2.11 | 0.000 |
| Comorbidities (presence of the condition) |                                                     |                     |        |      |                   |        |                                             |      |                     |        |       |                   |        |       |       |       |      |      |       |
|                                           | Cancer                                              | 2.6                 | 1.30   | 0.64 | 2.64              | 0.476  | -                                           | 3.6  | 1.81                | 0.98   | 3.34  | 0.059             | -      | -     | -     | -     | -    | -    | -     |
|                                           | Diabetes                                            | 3.3                 | 1.65   | 0.92 | 2.97              | 0.065  | -                                           | 4.4  | 2.24                | 1.34   | 3.75  | 0.002             | -      | -     | -     | -     | -    | -    | -     |
|                                           | Obesity                                             | 5.0                 | 2.57   | 1.19 | 5.55              | 0.016  | 2.35                                        | 1.29 | 2.13                | 0.034  | 4.3   | 2.16              | 0.95   | 4.94  | 0.067 | -     | -    | -    | -     |
|                                           | Blood disease                                       | 5.8                 | 3.03   | 1.67 | 5.50              | 0.000  | 2.09                                        | 1.11 | 3.93                | 0.022  | 7.7   | 4.16              | 2.46   | 7.03  | 0.000 | 1.96  | 1.09 | 3.51 | 0.024 |
|                                           | Hypertension                                        | 2.9                 | 1.48   | 1.00 | 2.13              | 0.050  | -                                           | 4.0  | 2.20                | 1.58   | 3.05  | 0.000             | -      | -     | -     | -     | -    | -    | -     |
|                                           | Ischemic heart disease                              | 2.8                 | 1.42   | 0.75 | 2.69              | 0.286  | -                                           | 7.4  | 4.08                | 2.69   | 6.20  | 0.000             | 1.74   | 1.09  | 2.78  | 0.020 | -    | -    | -     |
|                                           | Past coronary revascularization                     | 2.4                 | 1.16   | 0.28 | 4.74              | 0.836  | -                                           | 9.4  | 5.08                | 2.43   | 10.62 | 0.000             | -      | -     | -     | -     | -    | -    | -     |
|                                           | Heart failure                                       | 2.3                 | 1.12   | 0.27 | 4.57              | 0.875  | -                                           | 4.6  | 2.29                | 0.83   | 6.29  | 0.107             | -      | -     | -     | -     | -    | -    | -     |
|                                           | Other heart disease                                 | 3.4                 | 1.72   | 0.84 | 3.52              | 0.136  | -                                           | 6.8  | 3.66                | 2.17   | 6.16  | 0.000             | -      | -     | -     | -     | -    | -    | -     |
|                                           | Conduction disorder or dysrhythmia                  | 4.1                 | 2.09   | 1.21 | 3.62              | 0.008  | -                                           | 7.0  | 3.81                | 2.47   | 5.88  | 0.000             | 1.73   | 1.07  | 2.79  | 0.025 | -    | -    | -     |
|                                           | Cerebrovascular disease                             | 5.9                 | 3.12   | 1.78 | 5.54              | 0.000  | 1.98                                        | 1.09 | 3.60                | 0.025  | 7.7   | 4.19              | 2.52   | 6.98  | 0.000 | -     | -    | -    | -     |
|                                           | Vascular disease                                    | 0.8                 | 0.37   | 0.05 | 2.68              | 0.328  | -                                           | 8.5  | 4.59                | 2.45   | 8.62  | 0.000             | -      | -     | -     | -     | -    | -    | -     |
|                                           | COPD or respiratory failure                         | 2.6                 | 1.27   | 0.60 | 2.72              | 0.534  | -                                           | 7.7  | 4.22                | 2.66   | 6.70  | 0.000             | 2.02   | 1.23  | 3.31  | 0.006 | -    | -    | -     |
|                                           | Chronic nephropathy                                 | 9.7                 | 5.31   | 2.82 | 10.00             | 0.000  | 3.24                                        | 1.65 | 6.36                | 0.001  | 10.5  | 5.82              | 3.16   | 10.72 | 0.000 | 2.27  | 1.15 | 4.46 | 0.018 |
|                                           | Chronic disease of the liver or pancreas            | 3.5                 | 1.75   | 0.92 | 3.33              | 0.087  | -                                           | 4.8  | 2.51                | 1.45   | 4.35  | 0.001             | 1.97   | 1.11  | 3.48  | 0.020 | -    | -    | -     |

**Table 3.** Association between type of cholecystectomy and 30-day complications: OR and p-values from crude model, risk-adjusted model, and models with interaction with age group, severity of cholelithiasis, previous upper abdominal surgery and type of admission; p value of heterogeneity of the strata-specific estimates - Lazio Region, Italy, January 2007 - September 2008

|                                                            | %   | OR <sub>crude</sub> | 95% CI | p    | OR <sub>adj</sub> | 95% CI | p    | P <sub>het</sub> |       |
|------------------------------------------------------------|-----|---------------------|--------|------|-------------------|--------|------|------------------|-------|
| <u>30-day surgical-related complications: N=278, %=2.0</u> |     |                     |        |      |                   |        |      |                  |       |
| Open cholecystectomy                                       | 3,9 | 1,00                | -      | -    | 1,00              | -      | -    | -                | -     |
| Laparoscopic cholecystectomy                               | 1,7 | 0,44                | 0,33   | 0,57 | 0,000             | 0,60   | 0,44 | 0,80             | 0,001 |
| Age (years)                                                |     |                     |        |      |                   |        |      |                  | 0,917 |
| < 70                                                       | 1,8 | 0,49                | 0,35   | 0,71 | 0,000             | 0,62   | 0,43 | 0,90             | 0,012 |
| 70 - 79                                                    | 2,9 | 0,45                | 0,26   | 0,76 | 0,003             | 0,57   | 0,33 | 0,98             | 0,043 |
| ≥ 80                                                       | 3,3 | 0,41                | 0,15   | 1,12 | 0,082             | 0,51   | 0,18 | 1,38             | 0,184 |
| Severity of cholelithiasis                                 |     |                     |        |      |                   |        |      |                  | 0,053 |
| Low                                                        | 1,9 | 0,37                | 0,22   | 0,61 | 0,000             | 0,46   | 0,28 | 0,77             | 0,003 |
| Moderate                                                   | 2,0 | 0,58                | 0,40   | 0,85 | 0,005             | 0,78   | 0,53 | 1,16             | 0,224 |
| High                                                       | 3,7 | 0,24                | 0,11   | 0,53 | 0,000             | 0,30   | 0,13 | 0,68             | 0,004 |
| Previous upper abdominal surgery                           |     |                     |        |      |                   |        |      |                  | 0,654 |
| No                                                         | 2,0 | 0,45                | 0,34   | 0,59 | 0,000             | 0,60   | 0,44 | 0,81             | 0,001 |
| Yes                                                        | 5,7 | 0,26                | 0,03   | 2,64 | 0,256             | 0,36   | 0,03 | 3,69             | 0,388 |
| Type of admission                                          |     |                     |        |      |                   |        |      |                  | 0,001 |
| Elective                                                   | 1,6 | 0,32                | 0,22   | 0,46 | 0,000             | 0,37   | 0,25 | 0,55             | 0,000 |
| Emergency                                                  | 3,0 | 0,76                | 0,51   | 1,13 | 0,178             | 0,94   | 0,62 | 1,42             | 0,764 |
| <u>30-day systemic complications: N=280, %=2.1</u>         |     |                     |        |      |                   |        |      |                  |       |
| Open cholecystectomy                                       | 5,2 | 1,00                | -      | -    | 1,00              | -      | -    | -                | -     |
| Laparoscopic cholecystectomy                               | 1,6 | 0,29                | 0,23   | 0,37 | 0,000             | 0,52   | 0,40 | 0,69             | 0,000 |
| Age (years)                                                |     |                     |        |      |                   |        |      |                  | 0,136 |
| < 70                                                       | 1,5 | 0,34                | 0,24   | 0,49 | 0,000             | 0,47   | 0,32 | 0,68             | 0,000 |
| 70 - 79                                                    | 3,9 | 0,35                | 0,22   | 0,55 | 0,000             | 0,47   | 0,29 | 0,75             | 0,002 |
| ≥ 80                                                       | 7,1 | 0,71                | 0,37   | 1,37 | 0,309             | 0,99   | 0,50 | 1,94             | 0,975 |
| Severity of cholelithiasis                                 |     |                     |        |      |                   |        |      |                  | 0,755 |
| Low                                                        | 1,2 | 0,29                | 0,16   | 0,51 | 0,000             | 0,43   | 0,24 | 0,77             | 0,005 |
| Moderate                                                   | 2,2 | 0,34                | 0,25   | 0,47 | 0,000             | 0,55   | 0,39 | 0,77             | 0,001 |
| High                                                       | 6,2 | 0,38                | 0,21   | 0,70 | 0,002             | 0,56   | 0,30 | 1,05             | 0,071 |
| Previous upper abdominal surgery                           |     |                     |        |      |                   |        |      |                  | 0,702 |
| No                                                         | 2,0 | 0,29                | 0,22   | 0,37 | 0,000             | 0,52   | 0,39 | 0,69             | 0,000 |
| Yes                                                        | 4,3 | 0,41                | 0,04   | 4,69 | 0,470             | 0,86   | 0,07 | 10,40            | 0,905 |
| Type of admission                                          |     |                     |        |      |                   |        |      |                  | 0,545 |
| Elective                                                   | 1,5 | 0,33                | 0,23   | 0,50 | 0,000             | 0,48   | 0,32 | 0,72             | 0,000 |
| Emergency                                                  | 3,4 | 0,35                | 0,25   | 0,49 | 0,000             | 0,56   | 0,39 | 0,81             | 0,002 |

<sup>c</sup> There are no 30-day complications in patients with moderately high severity and undergoing laparotomic cholecystectomy

## SUPPLEMENTARY DATA

### DETAILED METHODS

#### PART 1 - Cohort selection

Source of data: Hospital Information System (HIS)

##### *Inclusion criteria*

All hospital admissions with a primary or secondary contributing diagnosis of *cholelithiasis* (International Classification of Diseases 9th Revision, Clinical Modification - ICD9-CM = 574) and a procedure code of *cholecystectomy* (ICD9-CM 51.22, 51.23), occurred in private and public hospitals of the Lazio Region between January 2007 and September 2008 were included, for a total of 16,432 cases. The final population, after sequential exclusions, consisted of 13,651 subjects.

##### *Exclusion criteria*

- long-term hospitalizations, rehabilitations and day-hospitals
- patients residents outside the Lazio Region
- subjects younger than 18 or older than 100 years old
- hospitalizations for delivery (MDC 14)
- hospitalizations for any type of trauma (ICD-9-CM codes ICD-9-CM 800-897)
- hospitalizations with diagnoses of cancer of the digestive system (ICD-9-CM codes 150-159)
- hospitalizations with other abdominal surgical procedures (selected ICD-9-CM codes)

#### PART 2 - Codes to describe severity of cholelithiasis

##### 1 - Cholelithiasis of the biliary tract without complications

574.20; 574.50; 574.90

##### 2. Cholelithiasis of the biliary tract with cholecystitis (without obstruction)

574.10; 574.40; 574.70; 575.1 AND 574.20 or 574.50 or 574.90; 574.00; 574.30; 574.60; 574.80; 575.0 AND 574.20 or 574.50 or 574.90

##### 3. Cholelithiasis of the biliary tract with obstruction (without cholecystitis)

574.21; 574.51; 574.01; 574.91; 575.2 AND 574.20 or 574.50 or 574.90; 576.2 AND 574.20 or 574.50 or 574.90; 575.3

##### 4. Cholelithiasis of the biliary tract with both obstruction and cholecystitis

574.01; 574.11; 574.31; 574.41; 574.61; 574.71; 574.81; 575.2 AND 574.00; 575.0 AND 574.20 575.1 AND 574.20 574.30; 575.0 AND 574.50; 575.1 AND 574.50; 574.60; 574.70; 574.80; 576.1; 576.2 AND 574.00; 575.0 AND 574.20; 575.1 AND 574.20; 574.30; 575.0 AND 574.50; 575.1 AND 574.50; 574.60; 574.70; 574.80

#### PART 3 - Codes to describe previous upper abdominal surgery

Codes in the index admission – post procedural states

*stomach* V44.1, V45.75, V55.1; *intestine* V44.2, V44.4, V45.3, V45.72, V53.5, V55.2, V55.4, V42.84; *liver* V42.7; *pancreas* 42.83

Codes in the previous 2-year- hospitalizations

Stomach

43.5,43.6,43.7,,43.8,43.9,44.31,44.39,44.40,44.41,44.42,44.5,44.61,44.63,44.64,44.65,44.69

Small intestine

45.31,45.32,45.33,45.34,45.50,45.51,45.6,45.9,45.91,45.92,45.93,46.01,46.02,46.60,46.61,  
46.62,46.71,46.72,46.73,46.74,46.80,46.81,46.93,46.97

Liver

50.2,50.3, 50.4,50.5,50.6

Pancreas

52.22,52.3,52.4,52.5,52.6,52.7,52.8,52.95,52.96

Abdominal Hernia

53.4,53.5,53.6,53.7

Peritoneum

54.4,54.5,54.6,54.7

Large intestine

45.41,45.49,45.7,45.8,45.94,46.03,46.04,46.63,46.64,46.75,46.76,46.79

Other surgery

55.4,55.5,56.2,56.4,57.1,57.6,57.7,65.3,65.4,65.5,65.6,66.4,66.5,68.3,68.4,68.6,68.8

**PART 4 - Codes to describe coexisting conditions**

On the basis of previous 2-year hospitalizations (following a validated coding algorithm – enhanced Elixhauser AHRQ-Web-ICD-9-CM - see reference n. 17 cited in the text).

*diabetes 250.xx; hypertension 401-405; obesity 280.0, ischemic disease 410-414, 429.7, previous revascularization V45.81, V45.82, procedures 36.0, 36.1, heart failure 428, other cardiac disease 093.2, 391, 393-398, 420-425, 429, 745, 746.3-646.6, V15.1, V42.2, V43.2, V43.3, V45.0 arrhythmia / conduction disorders 426-427, cerebrovascular disease 430-438, vascular disease 440-448, 557, hematologic disorders 280-285, 286, 287.1, 287.3-287.5, 288, 289, chronic respiratory disease 490-496, 518.81, 518.82, chronic liver disease / pancreas 571, 572, 577.1, 577.9, chronic renal disease 582-583, 585-588, V42.0, V45.1m V56, cancer 140-208.9*

**PART 5 - Codes to describe outcomes**

**A) Surgical-related complications (within 30 day after the surgery)**

in the index or in the subsequent hospitalizations (excluding hospitalizations for trauma ICD-9-CM 800-897) and delivery (MDC 14)

at least one of the following:

*998.1 Hemorrhage or hematoma or seroma complicating a procedure; 998.2 Accidental puncture or laceration during a procedure; 998.3 Disruption of wound; 998.4 Foreign body accidentally left during a procedure; 998.5 Postoperative infection; 998.6 Persistent postoperative fistula; 998.7 Acute reaction to foreign substance accidentally left during a procedure; 998.81 Emphysema (subcutaneous) (surgical) resulting from a procedure; 998.83 Non-healing surgical wound; 998.89 Other specified complications; 997.4 Digestive system complications; 998.9 Unspecified complication of procedure, not elsewhere classified*

1  
2  
3 Only in the subsequent hospitalizations

4  
5 at least one of the following:

6 *567 Peritonitis and retroperitoneal infections; 575.4 Perforation of gallbladder; 575.5 Fistula*  
7 *of gallbladder; 576.0 Postcholecystectomy syndrome; 576.3 Perforation of bile duct; 576.4*  
8 *Fistula of bile duct; 570 Acute and subacute necrosis of liver; 789.0 Abdominal pain*

9  
10  
11 **B) Systemic complications (within 30 day after the surgery)**

12 in the index or in the subsequent hospitalizations (excluding hospitalizations for trauma ICD-9-CM  
13 800-897) and delivery (MDC 14)

14  
15  
16 at least one of the following:

17 *997.0 Nervous system complications; 997.1 Cardiac complications; 997.3 Respiratory*  
18 *complications; 998.0 Postoperative shock; 410 Acute myocardial infarction; 415.1 Pulmonary*  
19 *embolism and infarction; 431 Intracerebral haemorrhage; 433.x1 Occlusion and stenosis of*  
20 *precerebral arteries with infarction; 434.x1 Occlusion of cerebral arteries with infarction; 436*  
21 *Acute, but ill-defined, cerebrovascular disease; 480-486 Pneumonia; 513.0 Abscess of lung*  
22 *518.4 Acute edema of lung, unspecified; 518.5 Pulmonary insufficiency following trauma and*  
23 *surgery; 785.5 Shock without mention of trauma; 788.2 Retention of urine*

24  
25  
26 Only in the subsequent hospitalizations

27 *038 Septicemia*  
28  
29  
30  
31  
32  
33  
34  
35  
36  
37  
38  
39  
40  
41  
42  
43  
44  
45  
46  
47  
48  
49  
50  
51  
52  
53  
54  
55  
56  
57  
58  
59  
60

## SUPPLEMENTARY DATA

### DETAILED METHODS

#### PART 1 - Cohort selection

Source of data: Hospital Information System (HIS)

##### *Inclusion criteria*

All hospital admissions with a primary or secondary contributing diagnosis of cholelithiasis (International Classification of Diseases 9th Revision, Clinical Modification - ICD9-CM = 574) and a procedure code of cholecystectomy (ICD9-CM 51.22, 51.23), occurred in private and public hospitals of the Lazio Region between January 2007 and September 2008 were included, for a total of 16,432 cases. The final population, after sequential exclusions, consisted of 13,651 subjects.

##### *Exclusion criteria*

- long-term hospitalizations, rehabilitations and day-hospitalizations
- patients residents outside the Lazio Region
- subjects younger than 18 or older than 100 years old
- hospitalizations for delivery (MDC 14)
- hospitalizations for any type of trauma (ICD-9-CM codes ICD-9-CM 800-897)
- hospitalizations with diagnoses of cancer of the digestive system (ICD-9-CM codes 150-159)
- hospitalizations with other abdominal surgical procedures (selected ICD-9-CM codes, as

follows:

#### ~~ICD-9-CM code Description~~

##### ~~Stomach~~

- ~~43.5 Partial gastrectomy with anastomosis to esophagus~~
- ~~43.6 Partial gastrectomy with anastomosis to duodenum~~
- ~~43.7 Partial gastrectomy with anastomosis to jejunum~~
- ~~43.8 Other partial gastrectomy~~
- ~~43.9 Total gastrectomy~~
- ~~44.31 High gastric bypass~~
- ~~44.39 Other gastroenterostomy~~
- ~~44.40 Suture of peptic ulcer, not otherwise specified~~
- ~~44.41 Suture of gastric ulcer site~~
- ~~44.42 Suture of duodenal ulcer site~~
- ~~44.5 Revision of gastric anastomosis~~
- ~~44.61 Suture of laceration of stomach~~
- ~~44.63 Closure of other gastric fistula~~
- ~~44.64 Gastropexy~~
- ~~44.65 Esophagogastroplasty~~
- ~~44.69 Other~~

##### ~~Small intestine~~

- ~~45.31 Other local excision of lesion of duodenum~~
- ~~45.32 Other destruction of lesion of duodenum~~
- ~~45.33 Local excision of lesion or tissue of small intestine, except duodenum~~
- ~~45.34 Other destruction of lesion of small intestine, except duodenum~~
- ~~45.50 Isolation of intestinal segment, not otherwise specified~~

|    |                                                                                                     |
|----|-----------------------------------------------------------------------------------------------------|
| 1  |                                                                                                     |
| 2  |                                                                                                     |
| 3  |                                                                                                     |
| 4  |                                                                                                     |
| 5  |                                                                                                     |
| 6  |                                                                                                     |
| 7  | <i>45.51 Isolation of segment of small intestine</i> _____                                          |
| 8  | <i>45.6 Other excision of small intestine</i> _____                                                 |
| 9  | <i>45.9 Intestinal anastomosis</i> _____                                                            |
| 10 | <i>45.91 Small-to-small intestinal anastomosis</i> _____                                            |
| 11 | <i>45.92 Anastomosis of small intestine to rectal stump</i> _____                                   |
| 12 | <i>45.93 Other small to large intestinal anastomosis</i> _____                                      |
| 13 | <i>46.01 Exteriorization of small intestine</i> _____                                               |
| 14 | <i>46.02 Resection of exteriorized segment of small intestine</i> _____                             |
| 15 | <i>46.60 Fixation of intestine, not otherwise specified</i> _____                                   |
| 16 | <i>46.61 Fixation of small intestine to abdominal wall</i> _____                                    |
| 17 | <i>46.62 Other fixation of small intestine</i> _____                                                |
| 18 | <i>46.71 Suture of laceration of duodenum</i> _____                                                 |
| 19 | <i>46.72 Closure of fistula of duodenum</i> _____                                                   |
| 20 | <i>46.73 Suture of laceration of small intestine, except duodenum</i> _____                         |
| 21 | <i>46.74 Closure of fistula of small intestine, except duodenum</i> _____                           |
| 22 | <i>46.80 Intra-abdominal manipulation of intestine, not otherwise specified</i> _____               |
| 23 | <i>46.81 Intra-abdominal manipulation of small intestine</i> _____                                  |
| 24 | <i>46.93 Revision of anastomosis of small intestine</i> _____                                       |
| 25 | <i>46.97 Transplant of intestine</i> _____                                                          |
| 26 | <b>Liver</b> _____                                                                                  |
| 27 | <i>50.2 Local excision or destruction of liver tissue or lesion</i> _____                           |
| 28 | <i>50.3 Lobectomy of liver</i> _____                                                                |
| 29 | <i>50.4 Total hepatectomy</i> _____                                                                 |
| 30 | <i>50.5 Liver transplant</i> _____                                                                  |
| 31 | <i>50.6 Repair of liver</i> _____                                                                   |
| 32 | _____                                                                                               |
| 33 | <b>Pancreas</b> _____                                                                               |
| 34 | <i>52.22 Other excision or destruction of lesion or tissue of pancreas or pancreatic duct</i> _____ |
| 35 | <i>52.3 Marsupialization of pancreatic cyst</i> _____                                               |
| 36 | <i>52.4 Internal drainage of pancreatic cyst</i> _____                                              |
| 37 | <i>52.5 Partial pancreatectomy</i> _____                                                            |
| 38 | <i>52.6 Total pancreatectomy</i> _____                                                              |
| 39 | <i>52.7 Radical pancreaticoduodenectomy</i> _____                                                   |
| 40 | <i>52.8 Transplant of pancreas</i> _____                                                            |
| 41 | <i>52.95 Other repair of pancreas</i> _____                                                         |
| 42 | <i>52.96 Anastomosis of pancreas</i> _____                                                          |
| 43 | _____                                                                                               |
| 44 | <b>Abdominal Hernia</b> _____                                                                       |
| 45 | <i>53.4 Repair of umbilical hernia</i> _____                                                        |
| 46 | <i>53.5 Repair of other hernia of anterior abdominal wall (without graft or prosthesis)</i> _____   |
| 47 | <i>53.6 Repair of other hernia of anterior abdominal wall with graft or prosthesis</i> _____        |
| 48 | <i>53.7 Repair of diaphragmatic hernia, abdominal approach</i> _____                                |
| 49 | _____                                                                                               |
| 50 | <b>Peritoneum</b> _____                                                                             |
| 51 | <i>54.4 Excision or destruction of peritoneal tissue</i> _____                                      |
| 52 | <i>54.5 Lysis of peritoneal adhesions</i> _____                                                     |
| 53 | <i>54.6 Suture of abdominal wall and peritoneum</i> _____                                           |
| 54 | <i>54.7 Other repair of abdominal wall and peritoneum</i> _____                                     |
| 55 | _____                                                                                               |
| 56 | <b>Large intestine</b> _____                                                                        |
| 57 |                                                                                                     |
| 58 |                                                                                                     |
| 59 |                                                                                                     |
| 60 |                                                                                                     |

~~45.41 Excision of lesion or tissue of large intestine~~  
~~45.49 Other destruction of lesion of large intestine~~  
~~45.7 Open and other partial excision of large intestine~~  
~~45.8 Total intra-abdominal colectomy~~  
~~45.94 Large to large intestinal anastomosis~~  
~~46.03 Exteriorization of large intestine~~  
~~46.04 Resection of exteriorized segment of large intestine~~  
~~46.63 Fixation of large intestine to abdominal wall~~  
~~46.64 Other fixation of large intestine~~  
~~46.75 Suture of laceration of large intestine~~  
~~46.76 Closure of fistula of large intestine~~  
~~46.79 Other repair of intestine~~

Other surgery

~~55.4 Partial nephrectomy~~  
~~55.5 Complete nephrectomy~~  
~~56.2 Ureterotomy~~  
~~56.4 Ureterectomy~~  
~~57.1 Cystotomy and cystostomy~~  
~~57.6 Partial cystectomy~~  
~~57.7 Total cystectomy~~  
~~65.3 Unilateral oophorectomy~~  
~~65.4 Unilateral salpingo-oophorectomy~~  
~~65.5 Bilateral oophorectomy~~  
~~65.6 Bilateral salpingo-oophorectomy~~  
~~66.4 Total unilateral salpingectomy~~  
~~66.5 Total bilateral salpingectomy~~  
~~68.3 Subtotal abdominal hysterectomy~~  
~~68.4 Total abdominal hysterectomy~~  
~~68.6 Radical abdominal hysterectomy~~  
~~68.8 Pelvic evisceration~~

## PART 2 - Codes to describe severity of cholelithiasis

### 1 - Cholelithiasis of the biliary tract without complications

~~574.20 Calculus of gallbladder without mention of cholecystitis~~  
~~574.50 Calculus of bile duct without mention of cholecystitis~~  
~~574.90 Calculus of gallbladder and bile duct without cholecystitis~~

### 2. Cholelithiasis of the biliary tract with cholecystitis (without obstruction)

~~574.10 Calculus of gallbladder with other cholecystitis~~  
~~574.40 Calculus of bile duct with other cholecystitis~~  
~~574.70 Calculus of gallbladder and bile duct with other cholecystitis~~

575.1 Other cholecystitis AND  
574.20 Calculus of gallbladder without mention of cholecystitis or or  
574.50 Calculus of bile duct without mention of cholecystitis or or



1  
2  
3  
4  
5  
6  
7 574.90 ~~Calculus of gallbladder and bile duct without cholecystitis~~  
8 574.00 ~~Calculus of gallbladder with acute cholecystitis~~  
9 574.30 ~~Calculus of bile duct with acute cholecystitis~~  
10 574.60 ~~Calculus of gallbladder and bile duct with acute cholecystitis~~  
11 574.80 ~~Calculus of gallbladder and bile duct with acute and chronic cholecystitis~~

12  
13 575.0 ~~Acute cholecystitis-AND~~

14 574.20 ~~Calculus of gallbladder without mention of cholecystitis or~~

15 574.50 ~~Calculus of bile duct without mention of cholecystitis or~~

16 574.90 ~~Calculus of gallbladder and bile duct without cholecystitis~~

17 ~~576.1 Cholangitis AND~~

18 ~~574.20 Calculus of gallbladder without mention of cholecystitis or~~

19 ~~574.50 Calculus of bile duct without mention of cholecystitis or~~

20 ~~574.90 Calculus of gallbladder and bile duct without cholecystitis~~

21 **3. Cholelithiasis of the biliary tract with obstruction (without cholecystitis)**

22 574.21 ~~Calculus of gallbladder without mention of cholecystitis~~

23 574.51 ~~Calculus of bile duct without mention of cholecystitis~~

24 574.91 ~~Calculus of gallbladder and bile duct without cholecystitis~~

25  
26 575.2 ~~Obstruction of gallbladder-AND~~

27 574.20 ~~Calculus of gallbladder without mention of cholecystitis or~~

28 574.50 ~~Calculus of bile duct without mention of cholecystitis or~~

29 574.90 ~~Calculus of gallbladder and bile duct without cholecystitis~~

30  
31 576.2 ~~Obstruction of bile duct-AND~~

32 574.20 ~~Calculus of gallbladder without mention of cholecystitis or~~

33 574.50 ~~Calculus of bile duct without mention of cholecystitis or~~

34 574.90 ~~Calculus of gallbladder and bile duct without cholecystitis~~

35 575.3 ~~Hydrops of gallbladder~~

36  
37 **4. Cholelithiasis of the biliary tract with both obstruction and cholecystitis**

38 574.01 ~~Calculus of gallbladder with acute cholecystitis~~

39 574.11 ~~Calculus of gallbladder with other cholecystitis~~

40 574.31 ~~Calculus of bile duct with acute cholecystitis~~

41 574.41 ~~Calculus of bile duct with other cholecystitis~~

42 574.61 ~~Calculus of gallbladder and bile duct with acute cholecystitis~~

43 574.71 ~~Calculus of gallbladder and bile duct with other cholecystitis~~

44 574.81 ~~Calculus of gallbladder and bile duct with acute and chronic cholecystitis~~

45  
46 575.2 ~~Obstruction of gallbladder-AND~~

47 574.00 ~~Calculus of gallbladder with acute cholecystitis~~

48 575.0 ~~Acute cholecystitis-AND~~ 574.20 ~~Calculus of gallbladder without mention of~~  
49 ~~cholecystitis~~

50 575.1 ~~Other cholecystitis-AND~~ 574.20 ~~Calculus of gallbladder without mention of~~  
51 ~~cholecystitis~~

52 574.30 ~~Calculus of bile duct with acute cholecystitis~~

53 575.0 ~~Acute cholecystitis-AND~~ 574.50 ~~Calculus of bile duct without mention of cholecystitis~~

54 575.1 ~~Other cholecystitis-AND~~ 574.50 ~~Calculus of bile duct without mention of cholecystitis~~

55 574.60 ~~Calculus of gallbladder and bile duct with acute cholecystitis~~

Formatted: Tab stops: Not at 3.35" + 6.69"

Formatted: Indent: Left: 0.49"

- 574.70 ~~Calculus of gallbladder and bile duct with other cholecystitis~~  
 574.80 ~~Calculus of gallbladder and bile duct with acute and chronic cholecystitis~~

### 576.1 cholangitis

#### 576.2 ~~Obstruction of bile duct~~ AND

- 574.00 ~~Calculus of gallbladder with acute cholecystitis~~  
 575.0 ~~Acute cholecystitis~~ AND 574.20 ~~Calculus of gallbladder without mention of cholecystitis~~  
 575.1 ~~Other cholecystitis~~ AND 574.20 ~~Calculus of gallbladder without mention of cholecystitis~~  
 574.30 ~~Calculus of bile duct with acute cholecystitis~~  
 575.0 ~~Acute cholecystitis~~ AND 574.50 ~~Calculus of bile duct without mention of cholecystitis~~  
 575.1 ~~Other cholecystitis~~ AND 574.50 ~~Calculus of bile duct without mention of cholecystitis~~  
 574.60 ~~Calculus of gallbladder and bile duct with acute cholecystitis~~  
 574.70 ~~Calculus of gallbladder and bile duct with other cholecystitis~~  
 574.80 ~~Calculus of gallbladder and bile duct with acute and chronic cholecystitis~~

Formatted: Indent: First line: 0.49"

Formatted: Justified

Formatted: Indent: First line: 0.49"

## PART 3 - Codes to describe previous upper abdominal surgery

Codes in the index admission – post procedural states

- stomach V44.1, V45.75, V55.1;  
 intestine V44.2, V44.4, V45.3, V45.72, V53.5, V55.2, V55.4, V42.84;  
 liver V42.7;  
 pancreas 42.83

Formatted: Indent: Left: 0.49"

Codes in the previous 2-year- hospitalizations

#### Stomach

- 43.5 ~~Partial gastrectomy with anastomosis to esophagus~~  
 43.6 ~~Partial gastrectomy with anastomosis to duodenum~~  
 43.7 ~~Partial gastrectomy with anastomosis to jejunum~~  
 43.8 ~~Other partial gastrectomy~~  
 43.9 ~~Total gastrectomy~~  
 44.31 ~~High gastric bypass~~  
 44.39 ~~Other gastroenterostomy~~  
 44.40 ~~Suture of peptic ulcer, not otherwise specified~~  
 44.41 ~~Suture of gastric ulcer site~~  
 44.42 ~~Suture of duodenal ulcer site~~  
 44.5 ~~Revision of gastric anastomosis~~  
 44.61 ~~Suture of laceration of stomach~~  
 44.63 ~~Closure of other gastric fistula~~  
 44.64 ~~Gastropexy~~  
 44.65 ~~Esophagogastroplasty~~  
 44.69 ~~Other~~

#### Small intestine

- 45.31 ~~Other local excision of lesion of duodenum~~

~~45.32-Other destruction of lesion of duodenum~~  
~~45.33-Local excision of lesion or tissue of small intestine, except duodenum~~  
~~45.34-Other destruction of lesion of small intestine, except duodenum~~  
~~45.50-Isolation of intestinal segment, not otherwise specified~~  
~~45.51-Isolation of segment of small intestine~~  
~~45.6-Other excision of small intestine~~  
~~45.9-Intestinal anastomosis~~  
~~45.91-Small to small intestinal anastomosis~~  
~~45.92-Anastomosis of small intestine to rectal stump~~  
~~45.93-Other small to large intestinal anastomosis~~  
~~46.01-Exteriorization of small intestine~~  
~~46.02-Resection of exteriorized segment of small intestine~~  
~~46.60-Fixation of intestine, not otherwise specified~~  
~~46.61-Fixation of small intestine to abdominal wall~~  
~~46.62-Other fixation of small intestine~~  
~~46.71-Suture of laceration of duodenum~~  
~~46.72-Closure of fistula of duodenum~~  
~~46.73-Suture of laceration of small intestine, except duodenum~~  
~~46.74-Closure of fistula of small intestine, except duodenum~~  
~~46.80-Intra-abdominal manipulation of intestine, not otherwise specified~~  
~~46.81-Intra-abdominal manipulation of small intestine~~  
~~46.93-Revision of anastomosis of small intestine~~  
~~46.97-Transplant of intestine~~

#### Liver

~~50.2-Local excision or destruction of liver tissue or lesion~~  
~~50.3-Lobectomy of liver~~  
~~50.4-Total hepatectomy~~  
~~50.5-Liver transplant~~  
~~50.6-Repair of liver~~

#### Pancreas

~~52.22-Other excision or destruction of lesion or tissue of pancreas or pancreatic duct~~  
~~52.3-Marsupialization of pancreatic cyst~~  
~~52.4-Internal drainage of pancreatic cyst~~  
~~52.5-Partial pancreatectomy~~  
~~52.6-Total pancreatectomy~~  
~~52.7-Radical pancreaticoduodenectomy~~  
~~52.8-Transplant of pancreas~~  
~~52.95-Other repair of pancreas~~  
~~52.96-Anastomosis of pancreas~~

#### Abdominal Hernia

~~53.4-Repair of umbilical hernia~~  
~~53.5-Repair of other hernia of anterior abdominal wall (without graft or prosthesis)~~  
~~53.6-Repair of other hernia of anterior abdominal wall with graft or prosthesis~~  
~~53.7-Repair of diaphragmatic hernia, abdominal approach~~

#### Peritoneum

~~54.4-Excision or destruction of peritoneal tissue~~  
~~54.5-Lysis of peritoneal adhesions~~

- 1  
2  
3  
4  
5  
6  
7 54.6 ~~Suture of abdominal wall and peritoneum~~  
8 54.7 ~~Other repair of abdominal wall and peritoneum~~  
9

10 Large intestine

- 11 45.41 ~~Excision of lesion or tissue of large intestine~~  
12 45.49 ~~Other destruction of lesion of large intestine~~  
13 45.7 ~~Open and other partial excision of large intestine~~  
14 45.8 ~~Total intra-abdominal colectomy~~  
15 45.94 ~~Large-to-large intestinal anastomosis~~  
16 46.03 ~~Exteriorization of large intestine~~  
17 46.04 ~~Resection of exteriorized segment of large intestine~~  
18 46.63 ~~Fixation of large intestine to abdominal wall~~  
19 46.64 ~~Other fixation of large intestine~~  
20 46.75 ~~Suture of laceration of large intestine~~  
21 46.76 ~~Closure of fistula of large intestine~~  
22 46.79 ~~Other repair of intestine~~

23 Other surgery

- 24 55.4 ~~Partial nephrectomy~~  
25 55.5 ~~Complete nephrectomy~~  
26 56.2 ~~Ureterotomy~~  
27 56.4 ~~Ureterectomy~~  
28 57.1 ~~Cystotomy and cystostomy~~  
29 57.6 ~~Partial cystectomy~~  
30 57.7 ~~Total cystectomy~~  
31 65.3 ~~Unilateral oophorectomy~~  
32 65.4 ~~Unilateral salpingo-oophorectomy~~  
33 65.5 ~~Bilateral oophorectomy~~  
34 65.6 ~~Bilateral salpingo-oophorectomy~~  
35 66.4 ~~Total unilateral salpingectomy~~  
36 66.5 ~~Total bilateral salpingectomy~~  
37 68.3 ~~Subtotal abdominal hysterectomy~~  
38 68.4 ~~Total abdominal hysterectomy~~  
39 68.6 ~~Radical abdominal hysterectomy~~  
40 68.8 ~~Pelvic evisceration~~  
41

42 **PART 4 - Codes to describe coexisting conditions**

43 On the basis of previous 2-year hospitalizations (following a validated coding algorithm – enhanced  
44 Elixhauser AHRQ-Web-ICD-9-CM - see reference n. 17 cited in the text).

45  
46 diabetes 250.xx; hypertension 401-405; obesity 280.0, ischemic disease 410-414, 429.7, previous  
47 revascularization V45.81, V45.82, procedures 36.0, 36.1, heart failure 428, other cardiac disease  
48 093.2, 391, 393-398, 420-425, 429, 745, 746.3-646.6, V15.1, V42.2, V43.2, V43.3, V45.0  
49 arrhythmia / conduction disorders 426-427, cerebrovascular disease 430-438, vascular disease 440-  
50 448, 557, hematologic disorders 280-285, 286, 287.1, 287.3-287.5, 288, 289, chronic respiratory  
51 disease 490-496, 518.81, 518.82, chronic liver disease / pancreas 571, 572, 577.1, 577.9, chronic  
52 renal disease 582-583, 585-588, V42.0, V45.1m V56, cancer 140-208.9  
53  
54  
55  
56  
57  
58  
59  
60

1  
2  
3  
4  
5  
6  
7 **PART 5 - Codes to describe outcomes**  
8

9 **A) Surgical-related complications (within 30 day after the surgery)**  
10 in the index or in the subsequent hospitalizations (excluding hospitalizations for trauma ICD-9-  
11 CM 800-897) and delivery (MDC 14)

12 at least one of the following:

- 13 998.1 Hemorrhage or hematoma or seroma complicating a procedure  
14 998.2 Accidental puncture or laceration during a procedure  
15 998.3 Disruption of wound  
16 998.4 Foreign body accidentally left during a procedure  
17 998.5 Postoperative infection  
18 998.6 Persistent postoperative fistula  
19 998.7 Acute reaction to foreign substance accidentally left during a procedure  
20 998.81 Emphysema (subcutaneous) (surgical) resulting from a procedure  
21 998.83 Non-healing surgical wound  
22 998.89 Other specified complications  
23 997.4 Digestive system complications  
24 998.9 Unspecified complication of procedure, not elsewhere classified

25  
26 Only in the subsequent hospitalizations

27 at least one of the following:

- 28 567 Peritonitis and retroperitoneal infections  
29 575.4 Perforation of gallbladder  
30 575.5 Fistula of gallbladder  
31 576.0 Postcholecystectomy syndrome  
32 576.3 Perforation of bile duct  
33 576.4 Fistula of bile duct  
34 570 Acute and subacute necrosis of liver  
35 789.0 Abdominal pain  
36

37  
38 **B) Systemic complications (within 30 day after the surgery)**  
39

40 in the index or in the subsequent hospitalizations (excluding hospitalizations for trauma ICD-9-CM  
41 800-897) and delivery (MDC 14)

42 at least one of the following:

- 43 997.0 Nervous system complications  
44 997.1 Cardiac complications  
45 997.3 Respiratory complications  
46 998.0 Postoperative shock  
47 410 Acute myocardial infarction  
48 415.1 Pulmonary embolism and infarction  
49 431 Intracerebral hemorrhage  
50 433.x1 Occlusion and stenosis of precerebral arteries with infarction  
51 434.x1 Occlusion of cerebral arteries with infarction  
52 436 Acute, but ill-defined, cerebrovascular disease  
53 480-486 Pneumonia  
54 513.0 Abscess of lung  
55

1  
2  
3  
4  
5  
6  
7  
8  
9  
10  
11  
12  
13  
14  
15  
16  
17  
18  
19  
20  
21  
22  
23  
24  
25  
26  
27  
28  
29  
30  
31  
32  
33  
34  
35  
36  
37  
38  
39  
40  
41  
42  
43  
44  
45  
46  
47  
48  
49  
50  
51  
52  
53  
54  
55  
56  
57  
58  
59  
60

*518.4 Acute edema of lung, unspecified*  
*518.5 Pulmonary insufficiency following trauma and surgery*  
*785.5 Shock without mention of trauma*  
*788.2 Retention of urine*

Only in the subsequent hospitalizations  
*038 Septicemia*

For peer review only

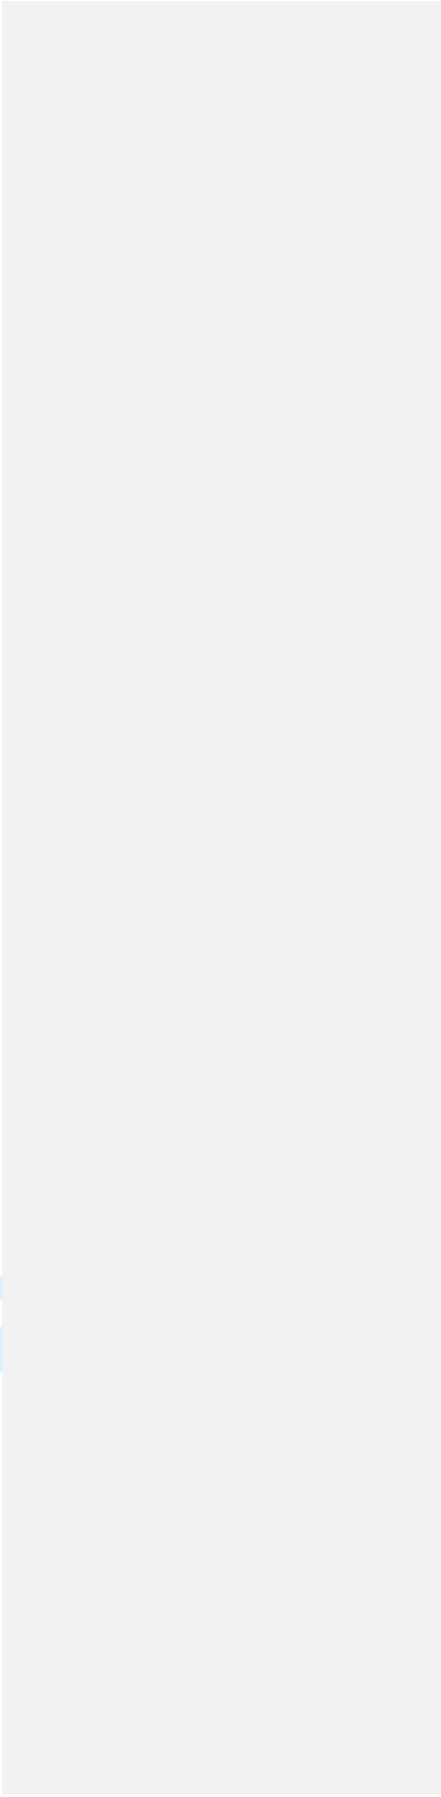



**Thirty-day complications after laparoscopic or open cholecystectomy: a population-based cohort study in Italy.**

|                                 |                                                                                                                                                                                                                                                                                                                                                                                                         |
|---------------------------------|---------------------------------------------------------------------------------------------------------------------------------------------------------------------------------------------------------------------------------------------------------------------------------------------------------------------------------------------------------------------------------------------------------|
| Journal:                        | <i>BMJ Open</i>                                                                                                                                                                                                                                                                                                                                                                                         |
| Manuscript ID:                  | bmjopen-2012-001943.R2                                                                                                                                                                                                                                                                                                                                                                                  |
| Article Type:                   | Research                                                                                                                                                                                                                                                                                                                                                                                                |
| Date Submitted by the Author:   | 11-Jan-2013                                                                                                                                                                                                                                                                                                                                                                                             |
| Complete List of Authors:       | Agabiti, Nera; Regional Health Service, Lazio, Epidemiology<br>Stafoggia, Massimo; Regional Health Service, Lazio, Epidemiology<br>Davoli, Marina; Regional Health Service, Lazio, Epidemiology<br>Fusco, Danilo; Regional Health Service, Lazio, Epidemiology<br>Barone, Anna; Regional Health Service, Lazio, Epidemiology<br>Perucci, Carlo; National Agency for Regional Health Services, Direction |
| <b>Primary Subject Heading</b>: | Epidemiology                                                                                                                                                                                                                                                                                                                                                                                            |
| Secondary Subject Heading:      | Evidence based practice, Health services research, Surgery, Gastroenterology and hepatology                                                                                                                                                                                                                                                                                                             |
| Keywords:                       | EPIDEMIOLOGY, Adverse events < THERAPEUTICS, QHepatobiliary surgery <uality in health care < HEALTH SERVICES ADMINISTRATION & MANAGEMENT, PUBLIC HEALTH, Clinical governance < HEALTH SERVICES ADMINISTRATION & MANAGEMENT, Health & safety < HEALTH SERVICES ADMINISTRATION & MANAGEMENT                                                                                                               |
|                                 |                                                                                                                                                                                                                                                                                                                                                                                                         |

SCHOLARONE™  
Manuscripts

only

1  
2  
3 **Thirty-day complications after laparoscopic or open cholecystectomy: a population-**  
4 **based cohort study in Italy.**  
5  
6

7 **Authors**  
8

9 Nera Agabiti MD, Massimo Stafoggia MS, Marina Davoli MD PhD, Danilo Fusco MS, Anna  
10 Patrizia Barone MD and Carlo A.Perucci MD\*.  
11

12 Department of Epidemiology, Regional Health Service, Lazio Region, Rome, Italy  
13

14 \*National Agency for Regional Health Services, Rome, Italy  
15  
16  
17  
18  
19

20 **Correspondence**  
21

22 Dott.ssa Nera Agabiti  
23

24 Department of Epidemiology, Regional Health Service, Lazio Region  
25

26 Via di S.Costanza 53  
27

28 00198 Rome (Italy)  
29

30 Tel 39-6-83060402  
31

32 Fax 39-6-83060374  
33

34 e:mail: [n.agabiti@deplazio.it](mailto:n.agabiti@deplazio.it)  
35  
36  
37  
38  
39

40 **Short running head:** Effectiveness of cholecystectomy  
41

42 **Word count for abstract:** 264  
43

44 **Word count for manuscript:** 2914  
45  
46  
47  
48

49 This work was supported by the Regional Health Service, Lazio Region on the behalf of  
50 P.Re.Val.E. Regional Outcome Evaluation Program. Lazio Region (Italy) available at  
51 <http://www.epidemiologia.lazio.it/prevale11/>  
52  
53  
54  
55  
56  
57  
58  
59  
60



1  
2  
3 **Thirty-day complications after laparoscopic or open cholecystectomy: a population-**  
4 **based cohort study in Italy.**  
5  
6  
7

8  
9 **Abstract**

10  
11 **Objective**

12  
13  
14 The objective of the study is to evaluate short-term complications after laparoscopic (LC) or  
15 open cholecystectomy (OC) in patients with gallstones by using linked hospital discharge  
16 data.  
17  
18  
19

20  
21 **Design**

22 Population-based cohort study.  
23  
24

25  
26 **Setting**

27 Data were obtained from the Regional Hospital Discharge Registry Lazio Region in Central  
28 Italy (around 5 million inhabitants) in 2007-2008.  
29  
30

31  
32 **Participants**

33 All patients admitted to hospitals of Lazio with symptomatic gallstones (ICD9-CM = 574)  
34 who underwent LC (ICD9-CM 51.23) or OC (ICD9-CM 51.22).  
35  
36  
37

38  
39 **Outcome measures**

40 1)“30-day surgical-related complications” defined as any complication of the biliary tract  
41 (including post-operative infection, hemorrhage or hematoma or seroma complicating a  
42 procedure, persistent postoperative fistula, perforation of bile duct, disruption of wound); 2)  
43 “30-day systemic complications” defined as any complications of other organs (including  
44 sepsis, infections from other organs, major cardiovascular events and selected adverse  
45 events).  
46  
47  
48  
49  
50  
51  
52

53  
54 **Results**  
55  
56  
57  
58  
59  
60

1  
2  
3 13,651 patients were included; 86.1% had LC, 13.9% OC. 2.0% experienced surgical-related  
4  
5 complications (SRC), 2.1% systemic complications (SC). The Odds Ratio (OR) of  
6  
7 complications after LC versus OC was 0.60 ( $p<0.001$ ) for SRC and 0.52 ( $p<0.001$ ) for SC. As  
8  
9 regards SRC, the advantage of LC was consistent across age categories, severity of gallstones  
10  
11 and previous upper abdominal surgery, while there was no advantage among people with  
12  
13 emergency admission (OR=0.94,  $p = 0.764$ ). For SC, no significant advantage of LC was seen  
14  
15 among very old people (OR=0.99,  $p=0.975$ ) and among those with previous upper abdominal  
16  
17 surgery (OR=0.86,  $p=0.905$ ).  
18  
19

## 20 21 **Conclusions**

22  
23 This large observational study confirms that LC is more effective than OC with respect to 30-  
24  
25 day complications. Population-based linkage of administrative datasets can enlarge evidence  
26  
27 of treatment benefits in clinical practice.  
28  
29

30  
31  
32  
33  
34 **Key words:** administrative data, cohort study, effectiveness, gallstones, hospital discharge  
35  
36 data, laparoscopic cholecystectomy, open cholecystectomy, outcomes, population-based,  
37  
38 post-operative complications.  
39  
40  
41  
42  
43  
44  
45  
46  
47  
48  
49  
50  
51  
52  
53  
54  
55  
56  
57  
58  
59  
60

## Article summary

### Article focus

-The advantage of laparoscopic cholecystectomy (LC) approach for the treatment of gallstone versus open surgery (OC) has been shown from RCTs and observational studies.

-The use of linked administrative health records has become one of the most powerful tools in observational studies aimed at comparing treatments.

-We compared laparoscopic and open cholecystectomy in term of 30-day complications using routinely collected databases in Lazio Region (Italy).

### Key messages

-This population-based study contributes to enlarge the evidence on effectiveness of LC in a real-life setting.

-As regards surgical-related complications, the advantage of LC was consistent across age categories, severity of gallstones and previous upper abdominal surgery, while there was no advantage among people with emergency admission.

-For systemic complications, no significant advantage of LC was seen among very old people and among those with previous upper abdominal surgery.

### Strengths and limitations

-Population-based design, 30-day outcomes, large numbers and robustness of analytic procedures are the main strengths.

-It contributes to the debate on the complex methodology to estimated risk of adverse events after surgery using secondary databases to monitor quality of care.

1  
2  
3  
4  
5  
6  
7  
8  
9  
10  
11  
12  
13  
14  
15  
16  
17  
18  
19  
20  
21  
22  
23  
24  
25  
26  
27  
28  
29  
30  
31  
32  
33  
34  
35  
36  
37  
38  
39  
40  
41  
42  
43  
44  
45  
46  
47  
48  
49  
50  
51  
52  
53  
54  
55  
56  
57  
58  
59  
60

-The use of ICD-9-CM codes in the definition of severity of disease presentation and of complications is a major limit.

For peer review only

## Introduction

Comparative effectiveness research is becoming central to monitor real-life impact of treatments and support public health decisions (1, 2). Although the basic concept of comparing therapies is not new, over the last few years many initiatives have been implemented in several countries to provide large-scale evidence on benefits and harms of different treatments (3-5). The use of linked administrative health records has become one of the most powerful tools in observational studies aimed at comparing treatments. They include hospital in-patients records, birth and death registrations, outpatient care records, dispensed pharmacy drugs (6-9).

In the Lazio Region (around 5.000.000 inhabitants) the P.Re.Val.E. Project (*Regional Program for Assessing the Outcomes of Health-care Interventions*) was launched in 2005. Its aims are: to measure the quality of health care provided in the Lazio Region, to describe variability of care provision across institutions and populations and to compare effectiveness of treatments for different medical and surgical conditions (10,11). Over 60 outcomes indicators are calculated based on data obtained from record-linkage procedures of different health systems. The results are periodically updated and publicly disseminated with discussion on critical methodological points.

Cholecystectomy is one of the most common abdominal surgical procedures in developed countries. Since its introduction in the late '80s, laparoscopic cholecystectomy (LC) has replaced open cholecystectomy (OC) as the treatment of choice for symptomatic gallstones (12, 13). Beneficial effects of LC have been demonstrated in studies showing the advantages from real-life settings using secondary databases (9,14-19). In the present study we aimed at developing a methodology to measure short-term complications after LC or OC using large administrative databases on behalf of the P.Re.Val.E. Secondly, we tested the hypothesis that

1  
2  
3 the advantages of LC versus OC could vary according to age and clinical patients'  
4  
5 characteristics.  
6  
7  
8  
9  
10

## 11 12 13 14 **Methods**

### 15 16 Source of data

17  
18 Data was derived from the Lazio Hospital Information System (HIS), which provides  
19  
20 information on patients' demographic data (gender, age, place of birth, place of residence),  
21  
22 admission and discharge dates, discharge diagnoses (up to 6) and medical procedures or  
23  
24 surgical interventions ((up to 6) according to the International Classification of disease, Ninth  
25  
26 Revision, Clinical Modification (ICD-9-CM), status at discharge (alive, dead, transferred to  
27  
28 another hospital), ward(s) of stay, date(s) of in-hospital transfer, and a regional code  
29  
30 corresponding to the admitting facility for patients discharged from all public and private  
31  
32 hospital of the Lazio Region (5.759.839 inhabitants).  
33  
34  
35  
36  
37  
38

### 39 Study population

40  
41 All hospital admissions with a primary or secondary diagnosis of gallstones (International  
42  
43 Classification of Diseases 9<sup>th</sup> Revision, Clinical Modification - ICD9-CM = 574) and a  
44  
45 procedure code of cholecystectomy (ICD9-CM 51.22, 51.23), occurred in private and public  
46  
47 hospitals of the Lazio Region between January 2007 and September 2008 were included, for a  
48  
49 total of 16,432 cases (age 18+ years). We a priori decided not to include codes for partial  
50  
51 cholecystectomy (ICD-9-CM 51.21 and 51.24) to increase the specificity of our exposure.  
52  
53 Information was retrieved from the HIS. In order to increase the case specificity, several  
54  
55 exclusion criteria were applied including long-term hospitalizations, rehabilitations, day-  
56  
57  
58  
59  
60

1  
2  
3 hospitals, hospitalizations for delivery or trauma or cancer, hospitalizations with abdominal  
4 surgical procedures other than cholecystectomy. The final population consisted of 13,651  
5 subjects (**Figure 1**). See the online **Supplementary Data** (Part 1) for details on the exclusion  
6 criteria and ICD9-CM codes. According to the Regional Law, the present study, which was  
7 based on anonymous computer records from health information systems, did not require for  
8 ethical approval.  
9  
10  
11  
12  
13  
14  
15

### 16 17 18 Patient-level risk factors 19

20 The following characteristics were considered for each patient: Age (<70; 70-79; >=80 years  
21 old); Gender; Severity of gallstones: it was classified as *low* (not-complicated), *moderate*  
22 (presence of cholecystitis or biliary tract obstruction), and *high* (presence of both  
23 inflammation and obstruction of the biliary tract); Previous upper abdominal surgery (based  
24 on previous 2-year hospitalizations); Comorbidities (based on previous 2-year  
25 hospitalizations) following validated algorithms (20,21); Type of admission: either *elective* or  
26 *emergency*. See the online **Supplementary Data** (Part 2-4) for details on the ICD-9-CM  
27 codes. The choice of *cut off* for age category was based on previous studies to distinguish  
28 adult and old people (22-24).  
29  
30  
31  
32  
33  
34  
35  
36  
37  
38  
39

### 40 Outcomes 41

42 We identified various complications within 30-days after the intervention and grouped them  
43 in two categories: 1) “*30-day surgical-related complications*” defined as any complication of  
44 the biliary tract (including post-operative infection, hemorrhage or hematoma or seroma  
45 complicating a procedure, persistent postoperative fistula, perforation of bile duct, disruption  
46 of wound ()); 2) “*30-day systemic complications*” defined as any complications of other organs  
47 (including sepsis, infections from other organs, major cardiovascular events and  
48  
49  
50  
51  
52  
53  
54  
55  
56  
57  
58  
59  
60

1  
2  
3 selected adverse events). The complete list of complications with ICD-9-CM codes is  
4 reported in the online **Supplementary Data** (Part 5). Among the various complications we  
5 included some conditions reported in the list of Patient Safety Indicators recently developed  
6 by the Agency for Health Care Research and Quality, while other items were specifically  
7 created on the basis of scientific literature on digestive surgery (14-19,25,26). Depending on  
8 the type of complication, some ICD9-CM codes were searched in both the index admission  
9 and the following ones in the 30-day period after the surgery, others were searched only in  
10 later hospitalizations. For example, peritonitis or acute pancreatitis was not counted as  
11 complications when reported in the index admission. See the online **Supplementary Data**  
12 (Part 5) for details on the ICD9-CM codes. In the case of a subsequent hospitalization  
13 occurred out of the study area (for example, in a region other than Lazio), we obtained  
14 information through record linkage procedure between hospital information systems. Because  
15 of the short follow up time, this happened in a minimal proportion of cases (0.1%). The  
16 outcome variables were: “*30-day surgical-related complications*” and “*30-day systemic*  
17 *complications*”; they were coded “1” if at least one of the complications within the group was  
18 present and “0” if none was recorded.  
19  
20  
21  
22  
23  
24  
25  
26  
27  
28  
29  
30  
31  
32  
33  
34  
35  
36  
37  
38  
39

#### 40 Type of cholecystectomy

41  
42 As exposure variable we defined “*type of cholecystectomy*” (laparoscopic cholecystectomy,  
43 LC vs. open cholecystectomy, OC). In the case of ICD-9-CM codes for both LC and OC  
44 (5%), the patient was considered exposed to the open surgical procedure. We could not use  
45 the specific ICD-9-code for a case converted from LC to OC (ICD-9-CM code V 64.41)  
46 because it was highly under-reported in our Region in the study period.  
47  
48  
49  
50  
51  
52  
53  
54

#### 55 Statistical analysis



1  
2  
3 Multiple logistic regression models were fitted to estimate the relative risk of 30-day  
4 complications (either “surgical-related” or “systemic”) after LC versus OC, adjusting for  
5 demographical and clinical risk factors. The two outcome variables were analysed separately.  
6  
7 The predictive model was made of two sets of predictors: 1) variables “a priori” chosen as  
8 confounders (age, gender, severity of gallstones, previous upper abdominal surgery, and type  
9 of admission); 2) variables empirically tested (comorbidities) which were selected using  
10 iterative stepwise statistical procedures) (27). Once the “best” predictive model was identified  
11 for each of the two outcome, the variable “*type of cholecystectomy*” was included, and the  
12 adjusted odds ratio (OR) of LC versus open surgery was estimated, with corresponding 95%  
13 confidence interval (95% CI) and p-value.  
14  
15  
16  
17  
18  
19  
20  
21  
22  
23  
24  
25  
26

27 In order to test the hypothesis of an effect modification by age, relative risk estimates for the  
28 age groups were derived by adding an interaction term between the age group and the  
29 treatment variable in the final multivariate logistic model. We obtained the OR of  
30 laparoscopic vs. open surgery within each age stratum by adding the corresponding  
31 interaction terms coefficients. This was accomplished by adding the coefficient from the  
32 reference category and that from the age stratum of interest, and by computing the  
33 corresponding standard error from the corresponding terms of the variance-covariance matrix.  
34 Similarly, effect modification was tested with regard to severity of cholelithiasis, previous  
35 upper abdominal surgery and type of admission. The corresponding tests of heterogeneity of  
36 the stratum-specific risk estimates were computed.  
37  
38  
39  
40  
41  
42  
43  
44  
45  
46  
47  
48  
49  
50

51 Sensitivity analyses were performed. First, in order to guarantee adequate control of  
52 confounding factors we identified and adjusted for all the individual factors associated with  
53 the treatment, within the propensity adjustment framework (28). This procedure is a two-step  
54  
55  
56  
57  
58  
59  
60

1  
2  
3 technique: 1. it estimates the a priori probability of exposure for each subject, based on  
4 clinical and demographic characteristics; 2. it standardizes for them in the association between  
5 treatment and the study outcome. The individual factors related to the exposure in the present  
6 study include age, gender, severity of cholelithiasis, previous upper abdominal surgery, type of  
7 admission, cardio-circulatory disease, cerebrovascular disease, COPD or respiratory failure,  
8 chronic nephropathy, chronic disease of the liver or pancreas. Second, to take into account the  
9 potential heterogeneous experience in laparoscopic surgery across different hospitals because  
10 of the patients' clustering within a single institution we perform a multilevel regression model  
11 with random intercepts for hospitals (29).  
12  
13  
14  
15  
16  
17  
18  
19  
20  
21  
22  
23  
24

25 All the statistical analyses were performed using SAS Software version 8.0 (SAS Institute,  
26 Inc. SAS/STAT software).  
27  
28  
29  
30  
31  
32  
33

## 34 **Results**

35  
36 A description of the study population, overall and by cholecystectomy procedure, is presented  
37 in **Table 1**. Over 80% of the patients were younger than 70 years, and moderate to high  
38 severity of the gallstones was diagnosed for 61.7%. As compared with patients undergoing  
39 LC, those who underwent OC were more likely to be elderly, males, with a more severe  
40 baseline disease and more chronic conditions. Furthermore, they were operated in emergency  
41 in most of the cases (52.4%), whereas LC was performed in elective hospitalizations much  
42 more frequently (73.9%).  
43  
44  
45  
46  
47  
48  
49  
50  
51  
52  
53

54 **Table 2** reports the relationship between demographic and clinical variables and the  
55 occurrence of complications. The adjusted risk of systemic complications increased with age  
56  
57  
58  
59  
60

1  
2  
3 and was much higher in patients with more severe baseline gallstones, whereas no clear age or  
4 severity-related differences in risk emerged with regard to surgical-related 30-day  
5 complications, once other co-factors were taken into account. Women were less likely to  
6 experience both types of complications. Having had a previous intervention on the upper  
7 digestive system seemed to enhance the risk of both surgical-related and systemic  
8 complications, though results are not statistically significant due to small power. Finally, the  
9 risk of both types of complications was more evident in emergency as opposed to scheduled  
10 interventions. Surgical-related complications were higher among subjects with obesity, blood  
11 disease, stroke or chronic nephropathy, whereas systemic complications were associated with  
12 blood diseases, ischemic heart disease, conduction disorders or dysrhythmias, COPD or  
13 respiratory failure, chronic nephropathy, and chronic diseases of the liver or pancreas.  
14  
15  
16  
17  
18  
19  
20  
21  
22  
23  
24  
25  
26  
27  
28

29 **Table 3** shows the relationship between type of cholecystectomy and outcomes, adjusted for  
30 the risk factors identified in Table 2. We report results of the advantage of LC vs. OC (OR,  
31 95% CI) in the cohort and in the each stratum of the variables tested in the models with  
32 interaction terms. The incidence of “30-day surgical-related complications” and “30-day  
33 systemic complications” was 2.0% and 2.1%, respectively. The odds ratio of surgical related  
34 complications for patients who underwent LC as compared to patients with OC was 0.60  
35 (p<0.001). The corresponding figure for systemic complications was 0.52 (p<0.001).  
36  
37  
38  
39  
40  
41  
42  
43  
44

45 As regards 30-day surgical-related complications, the protective effect of LC vs. OC was  
46 consistent across the age category, severity of cholelithiasis and previous upper abdominal  
47 surgery, while among people with emergency admission there was no advantage (OR=0.94 p  
48 = 0.764). Similarly, for systemic complications, the superiority of LC vs. OC was consistent  
49 regardless level of cholelithiasis severity, and elective/emergency admission, but for those  
50 80+ yrs aged people there was no advantage of LC vs. OC (OR 0.99, p = 0.975); also for  
51  
52  
53  
54  
55  
56  
57  
58  
59  
60

1  
2  
3 patients with previous upper abdominal surgery there was a much weaker advantage  
4  
5 (OR=0.86, p=0.905).  
6  
7

8  
9  
10 When the association between type of cholecystectomy and 30-day complications was  
11  
12 adjusted with the propensity adjustment method, results were consistent with those obtained  
13  
14 with the risk-adjustment procedure (LC vs. OC OR= 0.61 and OR=0.52 respectively for the  
15  
16 two outcomes). Finally, results were similar taking into account patients' clustering within  
17  
18 different hospitals (*data not shown*).  
19  
20

## 21 22 23 24 25 **Discussion**

26  
27 From this large observational study based on linked administrative health records - taking  
28  
29 into account the disomogeneous distribution of factors related to the probability to be offered  
30  
31 open surgery - people who end up having a LC have a better short-term prognosis than those  
32  
33 that get an OC for the treatment of gallstones. The superiority of laparoscopic approach in  
34  
35 term of 30-day complications is consistent in different age categories, different severity in  
36  
37 disease presentation and past history of upper abdominal surgery.  
38  
39

40  
41  
42 This population-based study contributes to enlarge the evidence on effectiveness of LC in a  
43  
44 real-life setting by providing an example from the Southern Europe area. It supports the  
45  
46 usefulness of observational approaches. The 30-day outcomes linked to admission represent  
47  
48 one strength of this study. Despite RTCs are considered the optimal study design when  
49  
50 comparing efficacy of treatments, observational studies provide a picture of treatment under  
51  
52 usual circumstances of health-care practice and can answer to the question “*Does it work in*  
53  
54 *practice?*” (3,8). RTCs often have small sample size and may under represent vulnerable  
55  
56  
57  
58  
59  
60

1  
2  
3 patient groups, including elderly patients with multiple comorbidities, children, and young  
4  
5 women, and operate in a highly controlled environment that is far from routine clinical  
6  
7 practice. Our study supports that LC is a reliable approach safer than OC not only in old age  
8  
9 group - confirming previous findings (22, 30) - but also in presence of severe disease  
10  
11 presentation and in patients with past history of upper digestive system surgery. Beneficial  
12  
13 effect of LC as regards systemic complications tends to be lower in 80+ yrs aged in  
14  
15 comparison with younger ages, and in patients with emergency admission in comparison to  
16  
17 elective admissions as regards 30-day surgical-related complications. These data add to the  
18  
19 evidence on the complex relationship between age and outcomes after surgery (22-24,30).  
20  
21  
22  
23

24  
25 A number of potential biases are present. First of all, people in the two groups of patients  
26  
27 analyzed are not homogenous in term of anesthesia risk due to higher frequency of elderly  
28  
29 and more comorbidities in the open group than in the laparoscopic one. When comparing the  
30  
31 effect of the two techniques using two different populations, the so called “indication bias”  
32  
33 may affect study validity (8,31). To limit this problem we run the propensity adjustment  
34  
35 analysis to take into account the different distribution of factors strongly associated with the  
36  
37 probability to receive open surgery in the study population. This analytical approach  
38  
39 confirmed the advantage of laparoscopic vs. open surgery obtained in the main logistic  
40  
41 regression analysis. Another critical point is the potential different distribution of laparoscopic  
42  
43 experience across surgeons; however a sensitivity analysis which took into account this point  
44  
45 led to similar results. The use of ICD-9-CM codes in the definition of severity of disease  
46  
47 presentation and of complications is another major limit. Discharge abstract data have little  
48  
49 insight into clinical details and do not inform on the temporal relationship of the clinical  
50  
51 conditions and processes, then defining complications is a difficult task (32). In this respect,  
52  
53 we tried to improve the accuracy of our measures both 1) applying a specific coding  
54  
55  
56  
57  
58  
59  
60

1  
2  
3 algorithm with subsequent hospital admissions used to retrieve adverse events and 2)  
4  
5 excluding in the “count” of complications specific items if reported in the index only (i.e.  
6  
7 peritonitis) because of the difficulty to determine if it was already present at admission.  
8  
9 Moreover, we cannot exclude an under-notification of complications – a major limit of our  
10  
11 source of data - but it is unlikely that is influenced by the type of surgery. Another major  
12  
13 problem is the potential misclassification of exposure since we were not able to measure the  
14  
15 occurrence of conversion of LC to OC. The number of people that were switched from LC to  
16  
17 OP is low in comparison to figures documented in other studies and it may represent a severe  
18  
19 source of bias in our study (30,33).  
20  
21  
22  
23  
24

25 Beneficial effects of the laparoscopic approach versus traditional open surgery for the  
26  
27 treatment of gallstones come from various randomized controlled trials (RCTs) (34). They  
28  
29 found significant shorter hospital stay and quicker convalescence associated with LC but no  
30  
31 differences in mortality, complications and operative time between the two procedures. A  
32  
33 better trend with the laparoscopic approach, including morbidity and mortality, comes from  
34  
35 observational studies. From a surveillance system in eight Swiss hospitals, surgical site  
36  
37 infections were less common in laparoscopic approach in comparison to traditional open  
38  
39 surgery (0.5% in LC vs. 1.8% in OC) (35). Significantly lower incidence of venous  
40  
41 thromboembolism and surgical site-infections in laparoscopic cases versus open cases was  
42  
43 observed in a large administrative dataset-based study in USA (14, 15). National estimates  
44  
45 for LC in USA showed an increase in LC from 52% in 1991 to 75% in 2000 with a constantly  
46  
47 low mortality rate and a decrease in biliary reconstruction rate over time (16). On the basis of  
48  
49 the 1997-2006 trend analysis by the same authors LC was associated with a low mortality  
50  
51 rate (mean value in the period: 0.52%) while OC with a significantly higher rate  
52  
53 (corresponding value: 4.9%) (9). In a retrospective study using Medicare beneficiaries  
54  
55  
56  
57  
58  
59  
60

1  
2  
3 common bile duct (CBD) injury during cholecystectomy was associated with a significant  
4  
5 higher risk of death in comparison to cholecystectomy without CBD injury over a 9.2 year  
6  
7 follow up period (17). From a Swiss 1995-2005 hospital database analysis the incidence rate  
8  
9 of bile duct injury after LC was 0.3% and did not change over time (18). The incidence of  
10  
11 conversion to OC after LC in all hospitals in England from 2005 to 2006 has been examined  
12  
13 using Hospital Episode Statistics and resulted 4.6% for elective procedures and 9.4% for  
14  
15 emergency procedures) (19).

16  
17  
18 Population-based linkage of routinely collected health data represents a precious tool to  
19  
20 support large- scale and real-world practice evaluation by measuring specific outcomes and  
21  
22 comparing them over time and across populations. Together with results from experimental  
23  
24 research settings, the conclusions of research studies evaluating clinical outcomes through  
25  
26 data linkage systems should be successfully incorporated into practice by clinicians/surgeons.  
27  
28  
29  
30  
31  
32  
33  
34  
35  
36  
37  
38  
39  
40  
41  
42  
43  
44  
45  
46  
47  
48  
49  
50  
51  
52  
53  
54  
55  
56  
57  
58  
59  
60

## ACKNOWLEDGMENTS

We are very grateful to Roberta Macci and Sandra Magliolo for their support in finding the cited articles and to Anna Kohn (Azienda Ospedaliera S.Camillo, Rome Italy) for her precious comments.

For peer review only



## FUNDING

This work was supported by the Regional Health Service, Lazio Region on the behalf of *P.Re.Val.E. Regional Outcome Evaluation Program*. Lazio Region (Italy).

Available at <http://www.epidemiologia.lazio.it/prevale11/>

## AUTHOR'S CONTRIBUTION

All Authors participated in the study design, in defining the study protocol and methodology, in acquisition of data, in planning the analyses, in interpreting the results. M.S. performed the analyses. N.A and M.S. drafted the manuscript.

**REFERENCES**

1. Madigan D, Ryan P. What can we really learn from observational studies? The need for empirical assessment of methodology for active drug safety surveillance and comparative effectiveness research. *Epidemiology* 2011; 22: 629-31.
2. Mullins CD, Abdulhalim AM, Lavallee DC. Continuous patient engagement in comparative effectiveness research. *JAMA* 2012; 307:1587-8.
3. Agency for Health Care Research and Quality (AHRQ) – Effective Health Care Program. Available at [www.effectivehealthcare.ahrq.gov](http://www.effectivehealthcare.ahrq.gov)
4. Fink AS, Campbell DA Jr, Mentzer RM Jr et al. The National Surgical Quality Improvement Program in non-veterans administration hospitals: initial demonstration of feasibility. *Ann Surg* 2002; 236: 344-53; discussion 353-4.
5. Fleetcroft R, Steel N, Cookson R et al. Incentive payments are not related to expected health gain in the pay for performance scheme for UK primary care: cross-sectional analysis. *BMC Health Serv Res* 2012; 12:94.
6. Hall SE, Holman CD, Finn J et al. Improving the evidence base for promoting quality and equity of surgical care using population-based linkage of administrative health records. *Int J Qual Health Care* 2005; 17: 415-420. Review.
7. Hanley JA, Dendukuri N. Efficient sampling approaches to address confounding in database studies. *Stat Methods Med Res* 2009; 18:81-105. Review.

- 1  
2  
3 8. Schneeweiss S. Developments in post-marketing comparative effectiveness research.  
4  
5 Clin Pharmacol Ther 2007; 82:143-56.. Review.  
6  
7  
8  
9  
10  
11  
12 9. Dolan JP, Diggs BS, Sheppard BC et al. The national mortality burden and significant  
13 factors associated with open and laparoscopic cholecystectomy: 1997-2006. J Gastrointest  
14 Surg 2009; 13:2292-2301.  
15  
16  
17  
18  
19  
20  
21  
22  
23 10. Fusco D, Barone AP, Sorge C et al. P.Re.Val.E.: Outcome research program for the  
24 evaluation of health care quality in Lazio, Italy. BMC Health Serv Res 2012; 12:25.  
25  
26  
27  
28  
29  
30 11. Pinnarelli L, Nuti S, Sorge C, et al. What drives hospital performance? The impact of  
31 comparative outcome evaluation of patients admitted for hip fracture in two Italian regions.  
32 BMJ Qual Saf 2012; 21: 127-34.  
33  
34  
35  
36  
37  
38 12. Keulemans YC, Venneman NG, Gouma DJ et al. New strategies for the treatment of  
39 gallstone disease. Scand J Gastroenterol Suppl 2002; 236:87-90. Review.  
40  
41  
42  
43  
44  
45 13. Williams EJ, Green J, Beckingham I et al. British Society of Gastroenterology -  
46 Guidelines on the management of common bile duct stones (CBDS).  
47 Gut 2008; 57:1004-21. Review.  
48  
49  
50  
51  
52  
53  
54 14. Varela JE, Wilson SE, Nguyen NT. Laparoscopic surgery significantly reduces surgical-  
55 site infections compared with open surgery. Surg Endosc 2010; 24: 270-276  
56  
57  
58  
59  
60

- 1  
2  
3 15. Nguyen NT, Hinojosa MW, Fayad C et al. Laparoscopic surgery is associated with a  
4 lower incidence of venous thromboembolism compared with open surgery. *Ann Surg* 2007;  
5 246: 1021-1027.  
6  
7  
8  
9  
10  
11 16. Dolan JP, Diggs BS, Sheppard BC, Hunter JG Ten-year trend in the national volume of  
12 bile duct injuries requiring operative repair. *Surg Endosc.* 2005; 19: 967-73..  
13  
14  
15  
16  
17  
18 17. Flum DR, Cheadle A, Prela C, Dellinger EP, Chan L Bile duct injury during  
19 cholecystectomy and survival in medicare beneficiaries. *JAMA* 2003; 290:2168-73.  
20  
21  
22  
23  
24  
25 18. Giger U, Ouaisi M, Schmitz SF, Krähenbühl S, Krähenbühl L. Bile duct injury and use of  
26 cholangiography during laparoscopic cholecystectomy. *Br J Surg* 2011; 98:391-396.  
27  
28  
29  
30  
31  
32 19. Ballal M, David G, Willmott S, Corless DJ et al. Conversion after laparoscopic  
33 cholecystectomy in England. *Surg Endosc* 2009; 23: 2338-2344.  
34  
35  
36  
37  
38  
39 20. Quan H, Sundararajan V, Halfon P et al. Coding algorithms for defining comorbidities in  
40 ICD-9-CM and ICD-10 administrative data. *Med Care* 2005;43:1130-9.  
41  
42  
43  
44  
45 21. Armitage JN, van der Meulen JH - Royal College of Surgeons Co-morbidity Consensus  
46 Group. Identifying co-morbidity in surgical patients using administrative data with the Royal  
47 College of Surgeons Charlson Score. *Br J Surg* 2010; 97:772-781.  
48  
49  
50  
51  
52  
53  
54 22. Yetkin G, Uludag M, Oba S et al. Laparoscopic cholecystectomy in elderly patients. *JSLs*  
55 2009; 13:587-591.  
56  
57  
58  
59  
60

1  
2  
3  
4  
5 23. Russ AJ, Obma KL, Rajamanickam V et al. Laparoscopy Improves Short-term Outcomes  
6 After Surgery for Diverticular Disease. *Gastroenterology* 2010; 138: 2267-2274.  
7  
8

9  
10  
11 24. Pessaux P, Tuech JJ, Derouet N et al. Laparoscopic cholecystectomy in the elderly: a  
12 prospective study. *Surg Endosc*. 2000; 14:1067-1069.  
13  
14

15  
16  
17 25. Kaafarani HM, Rosen AK. Using administrative data to identify surgical adverse events:  
18 an introduction to the Patient Safety Indicators. *Am J Surg* 2009; 198(5 Suppl):S63-S68  
19  
20  
21

22  
23  
24 26. Jhung MA, Banerjee SN. Administrative coding data and health care-associated  
25 infections. *Clin Infect Dis* 2009; 49:949-955. Review  
26  
27

28  
29  
30 27. Arcà M, Fusco D, Barone AP et al. Risk adjustment and outcome research. Part I.  
31  
32  
33  
34  
35  
36  
37  
38  
39  
40  
41  
42  
43  
44  
45  
46  
47  
48  
49  
50  
51  
52  
53  
54  
55  
56  
57  
58  
59  
60  
J Cardiovasc Med (Hagerstown) 2006;7: 682-90.

28. D'Agostino RB. Tutorials in biostatistics. Propensity score methods for bias reduction in  
the comparison of a treatment to a non-randomized control group. *Statist Med* 1998; 17:2265-  
2281.

29. Harvey Goldstein. *Multilevel statistical models*. 3rd Edition. 2003.  
Oxford University Press Inc., New York, NY10016

30. Kim HO, Yun JW, Shin JH et al. Outcome of laparoscopic cholecystectomy is not  
influenced by chronological age in the elderly. *World J Gastroenterol* 2009; 15:722-726.

- 1  
2  
3  
4  
5 31. Rothman KJ, Lash TL, Greenland S. Modern Epidemiology 3<sup>rd</sup> edition, Publisher:  
6  
7 Lippincott Williams & Wilkins, 2008  
8  
9  
10  
11  
12 32. Glance LG, Dick AW, Osler TM et al. Accuracy of hospital report cards based on  
13  
14 administrative data. Health Serv Res 2006; 41(4 Pt 1):1413-1437  
15  
16  
17  
18 33. Shamiyeh A, Danis J, Wayand W et al. 14-year analysis of laparoscopic  
19  
20 cholecystectomy: conversion--when and why? Surg Laparosc Endosc Percutan Tech. 2007  
21  
22 ;17:271-6.  
23  
24  
25  
26  
27 34. Keus F, Gooszen HG, van Laarhoven CJ. Open, small-incision, or laparoscopic  
28  
29 cholecystectomy for patients with symptomatic cholecystolithiasis. An overview of Cochrane  
30  
31 Hepato-Biliary Group reviews. Cochrane Database Syst Rev 2010; (1):CD008318.  
32  
33  
34  
35  
36 35. Romy S, Eisenring MC, Bettschart V et al. Laparoscope use and surgical site infections in  
37  
38 digestive surgery. Ann Surg 2008; 247:627-632.  
39  
40  
41  
42  
43  
44  
45  
46  
47  
48  
49  
50  
51  
52  
53  
54  
55  
56  
57  
58  
59  
60

Figure 1. Selection of the study population

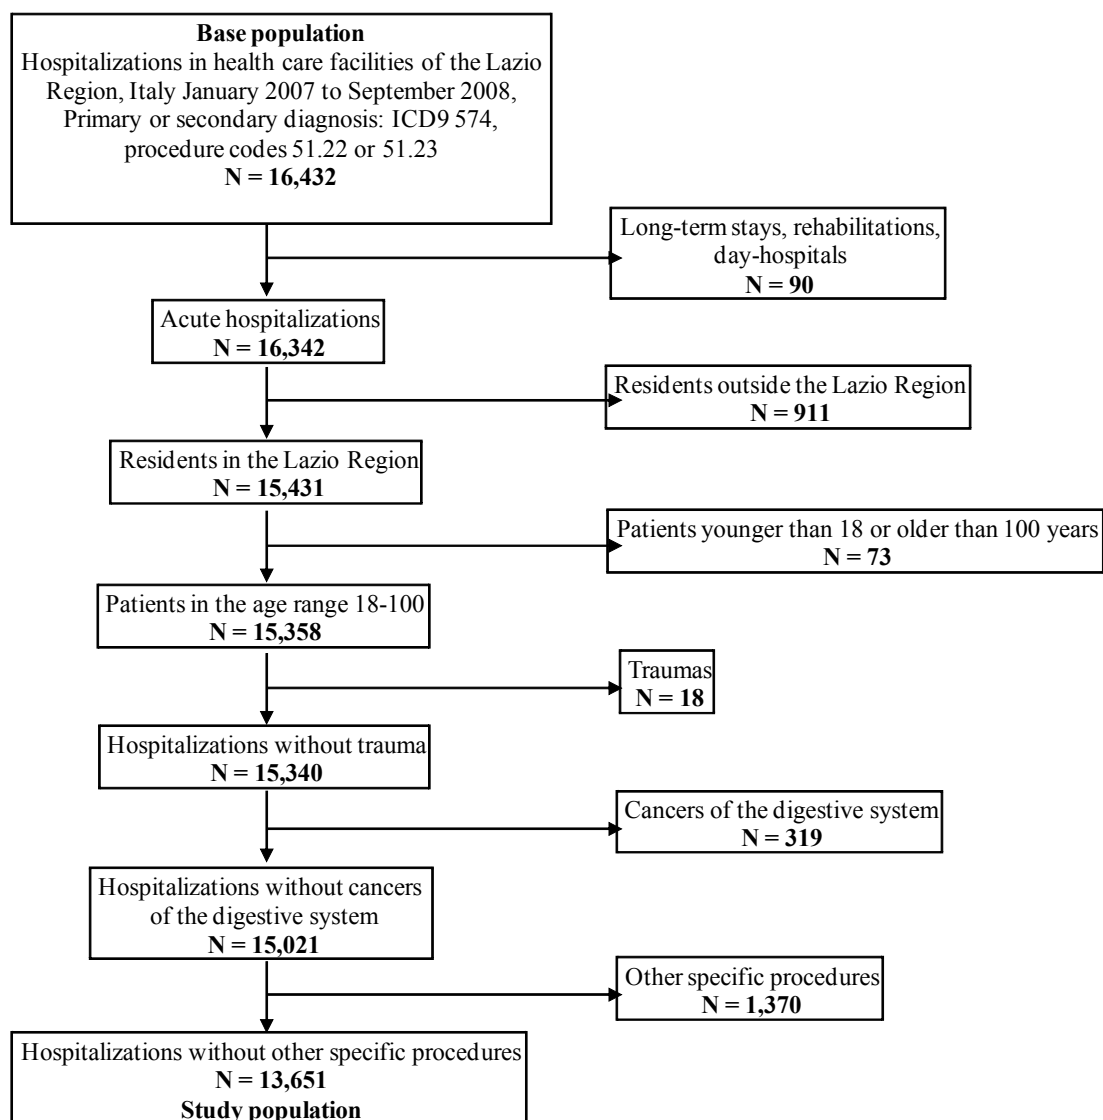

**Table 1.** Study population, overall and by cholecystectomy procedure: distribution by age, gender, severity of cholelithiasis, previous upper abdominal surgery, type of admission, comorbidities - Lazio Region, Italy, January 2007-September 2008

| Patient characteristics                 | Laparoscopic chole cystectomy            |             | Open chole cystectomy |             | Total         |              |      |
|-----------------------------------------|------------------------------------------|-------------|-----------------------|-------------|---------------|--------------|------|
|                                         | N                                        | %           | N                     | %           | N             | %            |      |
| <b>Total</b>                            | <b>11.752</b>                            | <b>86,1</b> | <b>1.899</b>          | <b>13,9</b> | <b>13.651</b> | <b>100,0</b> |      |
| <b>Age (years)</b>                      |                                          |             |                       |             |               |              |      |
|                                         | <70                                      | 9.913       | 84,4                  | 1.162       | 61,2          | 11.075       | 81,1 |
|                                         | 70-79                                    | 1.543       | 13,1                  | 485         | 25,5          | 2.028        | 14,9 |
|                                         | ≥ 80                                     | 296         | 2,5                   | 252         | 13,3          | 548          | 4,0  |
|                                         |                                          | 11.752      |                       |             |               |              |      |
| <b>Gender</b>                           |                                          |             |                       |             |               |              |      |
|                                         | Men                                      | 4.349       | 37,0                  | 979         | 51,6          | 5.328        | 39,0 |
|                                         | Women                                    | 7.403       | 63,0                  | 920         | 48,4          | 8.323        | 61,0 |
| <b>Severity of cholelithiasis</b>       |                                          |             |                       |             |               |              |      |
|                                         | Low                                      | 4.767       | 40,6                  | 470         | 24,7          | 5.237        | 38,4 |
|                                         | Moderate                                 | 6.456       | 54,9                  | 1.200       | 63,2          | 7.656        | 56,1 |
|                                         | High                                     | 529         | 4,5                   | 229         | 12,1          | 758          | 5,6  |
| <b>Previous upper abdominal surgery</b> |                                          |             |                       |             |               |              |      |
|                                         | No                                       | 11.714      | 99,7                  | 1.867       | 98,3          | 13.581       | 99,5 |
|                                         | Yes                                      | 38          | 0,3                   | 32          | 1,7           | 70           | 0,5  |
| <b>Type of admission</b>                |                                          |             |                       |             |               |              |      |
|                                         | Elective                                 | 8.690       | 73,9                  | 903         | 47,6          | 9.593        | 70,3 |
|                                         | Emergency                                | 3.062       | 26,1                  | 996         | 52,4          | 4.058        | 29,7 |
| <b>Comorbidities</b>                    |                                          |             |                       |             |               |              |      |
|                                         | Cancer                                   | 232         | 2,0                   | 75          | 3,9           | 307          | 2,2  |
|                                         | Diabetes                                 | 268         | 2,3                   | 100         | 5,3           | 368          | 2,7  |
|                                         | Obesity                                  | 115         | 1,0                   | 25          | 1,3           | 140          | 1,0  |
|                                         | Blood disease                            | 146         | 1,2                   | 62          | 3,3           | 208          | 1,5  |
|                                         | Hypertension                             | 842         | 7,2                   | 247         | 13,0          | 1.089        | 8,0  |
|                                         | Ischemic heart disease                   | 246         | 2,1                   | 107         | 5,6           | 353          | 2,6  |
|                                         | Past coronary revascularization          | 63          | 0,5                   | 22          | 1,2           | 85           | 0,6  |
|                                         | Heart failure                            | 47          | 0,4                   | 41          | 2,2           | 88           | 0,6  |
|                                         | Other heart disease                      | 158         | 1,3                   | 76          | 4,0           | 234          | 1,7  |
|                                         | Conduction disorders or dysrhythmia      | 250         | 2,1                   | 95          | 5,0           | 345          | 2,5  |
|                                         | Cerebrovascular disease                  | 146         | 1,2                   | 74          | 3,9           | 220          | 1,6  |
|                                         | Vascular disease                         | 91          | 0,8                   | 38          | 2,0           | 129          | 0,9  |
|                                         | COPD* or respiratory failure             | 189         | 1,6                   | 84          | 4,4           | 273          | 2,0  |
|                                         | Chronic nephropathy                      | 68          | 0,6                   | 46          | 2,4           | 114          | 0,8  |
|                                         | Chronic disease of the liver or pancreas | 219         | 1,9                   | 70          | 3,7           | 289          | 2,1  |

\*Chronic Obstructive Pulmonary Disease



Table 2. Factors related to the incidence of 30-day complications after cholecystectomy. OR crude and adjusted, p-values - Lazio Region, Italy, January 2007-September 2008 (N = 13,651)

| Patient characteristics                   | 30-day surgical-related complications (N=278, 2.0%) |                     |        |      |                   |        | 30-day systemic complications (N=280, 2.1%) |      |                     |        |      |                   |        |       |       |       |
|-------------------------------------------|-----------------------------------------------------|---------------------|--------|------|-------------------|--------|---------------------------------------------|------|---------------------|--------|------|-------------------|--------|-------|-------|-------|
|                                           | %                                                   | OR <sub>crude</sub> | 95% CI | p    | OR <sub>adj</sub> | 95% CI | p                                           | %    | OR <sub>crude</sub> | 95% CI | p    | OR <sub>adj</sub> | 95% CI | p     |       |       |
| Age (years)                               |                                                     |                     |        |      |                   |        |                                             |      |                     |        |      |                   |        |       |       |       |
|                                           | < 70                                                | 1.8                 | 1.00   | -    | -                 | -      | 1.00                                        | -    | -                   | -      | -    | 1.5               | 1.00   | -     | -     |       |
|                                           | 70 - 79                                             | 2.9                 | 1.62   | 1.21 | 2.18              | 0.001  | 1.36                                        | 1.00 | 1.83                | 0.048  | 3.9  | 2.68              | 2.04   | 3.52  | 0.000 |       |
|                                           | ≥ 80                                                | 3.3                 | 1.84   | 1.13 | 3.00              | 0.015  | 1.21                                        | 0.72 | 2.03                | 0.475  | 7.1  | 5.13              | 3.58   | 7.36  | 0.000 |       |
| Gender                                    |                                                     |                     |        |      |                   |        |                                             |      |                     |        |      |                   |        |       |       |       |
|                                           | Men                                                 | 2.5                 | 1.00   | -    | -                 | -      | 1.00                                        | -    | -                   | -      | -    | 2.6               | 1.00   | -     | -     |       |
|                                           | Women                                               | 1.7                 | 0.69   | 0.55 | 0.88              | 0.002  | 0.75                                        | 0.59 | 0.96                | 0.022  | 1.7  | 0.66              | 0.52   | 0.84  | 0.001 |       |
| Severity of cholelithiasis                |                                                     |                     |        |      |                   |        |                                             |      |                     |        |      |                   |        |       |       |       |
|                                           | Low                                                 | 1.9                 | 1.00   | -    | -                 | -      | 1.00                                        | -    | -                   | -      | -    | 1.2               | 1.00   | -     | -     |       |
|                                           | Moderate                                            | 2.0                 | 1.08   | 0.84 | 1.40              | 0.538  | 0.96                                        | 0.74 | 1.24                | 0.733  | 2.2  | 1.84              | 1.38   | 2.46  | 0.000 |       |
|                                           | High                                                | 3.7                 | 2.03   | 1.32 | 3.14              | 0.001  | 1.43                                        | 0.91 | 2.24                | 0.122  | 6.2  | 5.30              | 3.59   | 7.83  | 0.000 |       |
| Previous upper abdominal surgery          |                                                     |                     |        |      |                   |        |                                             |      |                     |        |      |                   |        |       |       |       |
|                                           | No                                                  | 2.0                 | 1.00   | -    | -                 | -      | 1.00                                        | -    | -                   | -      | -    | 2.0               | 1.00   | -     | -     |       |
|                                           | Yes                                                 | 5.7                 | 2.94   | 1.07 | 8.13              | 0.037  | 2.29                                        | 0.81 | 6.51                | 0.119  | 4.3  | 2.15              | 0.67   | 6.88  | 0.197 |       |
| Type of admission                         |                                                     |                     |        |      |                   |        |                                             |      |                     |        |      |                   |        |       |       |       |
|                                           | Elective                                            | 1.6                 | 1.00   | -    | -                 | -      | 1.00                                        | -    | -                   | -      | -    | 1.5               | 1.00   | -     | -     |       |
|                                           | Emergency                                           | 3.0                 | 1.85   | 1.45 | 2.35              | 0.000  | 1.66                                        | 1.29 | 2.13                | 0.000  | 3.4  | 2.34              | 1.85   | 2.97  | 0.000 |       |
| Comorbidities (presence of the condition) |                                                     |                     |        |      |                   |        |                                             |      |                     |        |      |                   |        |       |       |       |
|                                           | Cancer                                              | 2.6                 | 1.30   | 0.64 | 2.64              | 0.476  | -                                           | -    | -                   | -      | -    | 3.6               | 1.81   | 0.98  | 3.34  | 0.059 |
|                                           | Diabetes                                            | 3.3                 | 1.65   | 0.92 | 2.97              | 0.095  | -                                           | -    | -                   | -      | -    | 4.4               | 2.24   | 1.34  | 3.75  | 0.002 |
|                                           | Obesity                                             | 5.0                 | 2.57   | 1.19 | 5.55              | 0.016  | 2.35                                        | 1.29 | 2.13                | 0.034  | 4.3  | 2.16              | 0.95   | 4.94  | 0.067 |       |
|                                           | Blood disease                                       | 5.8                 | 3.03   | 1.67 | 5.90              | 0.000  | 2.09                                        | 1.11 | 3.93                | 0.022  | 7.7  | 4.16              | 2.46   | 7.03  | 0.000 |       |
|                                           | Hypertension                                        | 2.9                 | 1.46   | 1.00 | 2.13              | 0.050  | -                                           | -    | -                   | -      | -    | 4.0               | 2.20   | 1.58  | 3.05  | 0.000 |
|                                           | Ischemic heart disease                              | 2.8                 | 1.42   | 0.75 | 2.69              | 0.286  | -                                           | -    | -                   | -      | -    | 7.4               | 4.08   | 2.69  | 6.20  | 0.000 |
|                                           | Past coronary revascularization                     | 2.4                 | 1.16   | 0.28 | 4.74              | 0.836  | -                                           | -    | -                   | -      | -    | 9.4               | 5.08   | 2.43  | 10.62 | 0.000 |
|                                           | Heart failure                                       | 2.3                 | 1.12   | 0.27 | 4.57              | 0.875  | -                                           | -    | -                   | -      | -    | 4.6               | 2.29   | 0.83  | 6.29  | 0.107 |
|                                           | Other heart disease                                 | 3.4                 | 1.72   | 0.84 | 3.52              | 0.136  | -                                           | -    | -                   | -      | -    | 6.8               | 3.66   | 2.17  | 6.16  | 0.000 |
|                                           | Conduction disorder or dysrhythmia                  | 4.1                 | 2.09   | 1.21 | 3.62              | 0.008  | -                                           | -    | -                   | -      | -    | 7.0               | 3.81   | 2.47  | 5.88  | 0.000 |
|                                           | Cerebrovascular disease                             | 5.9                 | 3.12   | 1.76 | 5.54              | 0.000  | 1.98                                        | 1.09 | 3.60                | 0.025  | 7.7  | 4.19              | 2.52   | 6.98  | 0.000 |       |
|                                           | Vascular disease                                    | 0.8                 | 0.37   | 0.05 | 2.68              | 0.328  | -                                           | -    | -                   | -      | -    | 8.5               | 4.59   | 2.45  | 8.62  | 0.000 |
|                                           | COPD or respiratory failure                         | 2.6                 | 1.27   | 0.60 | 2.72              | 0.534  | -                                           | -    | -                   | -      | -    | 7.7               | 4.22   | 2.66  | 6.70  | 0.000 |
|                                           | Chronic nephropathy                                 | 9.7                 | 5.31   | 2.82 | 10.00             | 0.000  | 3.24                                        | 1.65 | 6.36                | 0.001  | 10.5 | 5.82              | 3.16   | 10.72 | 0.000 |       |
|                                           | Chronic disease of the liver or pancreas            | 3.5                 | 1.75   | 0.92 | 3.33              | 0.087  | -                                           | -    | -                   | -      | -    | 4.8               | 2.51   | 1.45  | 4.35  | 0.001 |

**Table 3.** Association between type of cholecystectomy and 30-day complications: OR and p-values from crude model, risk-adjusted model, and models with interaction with age group, severity of cholelithiasis, previous upper abdominal surgery and type of admission; p value of heterogeneity of the strata-specific estimates - Lazio Region, Italy, January 2007 - September 2008

|                                                            | %   | OR <sub>crude</sub> | 95% CI |      | p     | OR <sub>adj</sub> | 95% CI |       | p     | P <sub>het</sub> |
|------------------------------------------------------------|-----|---------------------|--------|------|-------|-------------------|--------|-------|-------|------------------|
| <u>30-day surgical-related complications: N=278, %=2.0</u> |     |                     |        |      |       |                   |        |       |       |                  |
| Open cholecystectomy                                       | 3,9 | 1,00                | -      | -    | -     | 1,00              | -      | -     | -     | -                |
| Laparoscopic cholecystectomy                               | 1,7 | 0,44                | 0,33   | 0,57 | 0,000 | 0,60              | 0,44   | 0,80  | 0,001 | -                |
| Age (years)                                                |     |                     |        |      |       |                   |        |       |       | 0,917            |
| < 70                                                       | 1,8 | 0,49                | 0,35   | 0,71 | 0,000 | 0,62              | 0,43   | 0,90  | 0,012 | -                |
| 70 - 79                                                    | 2,9 | 0,45                | 0,26   | 0,76 | 0,003 | 0,57              | 0,33   | 0,98  | 0,043 | -                |
| ≥ 80                                                       | 3,3 | 0,41                | 0,15   | 1,12 | 0,082 | 0,51              | 0,18   | 1,38  | 0,184 | -                |
| Severity of cholelithiasis                                 |     |                     |        |      |       |                   |        |       |       | 0,053            |
| Low                                                        | 1,9 | 0,37                | 0,22   | 0,61 | 0,000 | 0,46              | 0,28   | 0,77  | 0,003 | -                |
| Moderate                                                   | 2,0 | 0,58                | 0,40   | 0,85 | 0,005 | 0,78              | 0,53   | 1,16  | 0,224 | -                |
| High                                                       | 3,7 | 0,24                | 0,11   | 0,53 | 0,000 | 0,30              | 0,13   | 0,68  | 0,004 | -                |
| Previous upper abdominal surgery                           |     |                     |        |      |       |                   |        |       |       | 0,654            |
| No                                                         | 2,0 | 0,45                | 0,34   | 0,59 | 0,000 | 0,60              | 0,44   | 0,81  | 0,001 | -                |
| Yes                                                        | 5,7 | 0,26                | 0,03   | 2,64 | 0,256 | 0,36              | 0,03   | 3,69  | 0,388 | -                |
| Type of admission                                          |     |                     |        |      |       |                   |        |       |       | 0,001            |
| Elective                                                   | 1,6 | 0,32                | 0,22   | 0,46 | 0,000 | 0,37              | 0,25   | 0,55  | 0,000 | -                |
| Emergency                                                  | 3,0 | 0,76                | 0,51   | 1,13 | 0,178 | 0,94              | 0,62   | 1,42  | 0,764 | -                |
| <u>30-day systemic complications: N=280, %=2.1</u>         |     |                     |        |      |       |                   |        |       |       |                  |
| Open cholecystectomy                                       | 5,2 | 1,00                | -      | -    | -     | 1,00              | -      | -     | -     | -                |
| Laparoscopic cholecystectomy                               | 1,6 | 0,29                | 0,23   | 0,37 | 0,000 | 0,52              | 0,40   | 0,69  | 0,000 | -                |
| Age (years)                                                |     |                     |        |      |       |                   |        |       |       | 0,136            |
| < 70                                                       | 1,5 | 0,34                | 0,24   | 0,49 | 0,000 | 0,47              | 0,32   | 0,68  | 0,000 | -                |
| 70 - 79                                                    | 3,9 | 0,35                | 0,22   | 0,55 | 0,000 | 0,47              | 0,29   | 0,75  | 0,002 | -                |
| ≥ 80                                                       | 7,1 | 0,71                | 0,37   | 1,37 | 0,309 | 0,99              | 0,50   | 1,94  | 0,975 | -                |
| Severity of cholelithiasis                                 |     |                     |        |      |       |                   |        |       |       | 0,755            |
| Low                                                        | 1,2 | 0,29                | 0,16   | 0,51 | 0,000 | 0,43              | 0,24   | 0,77  | 0,005 | -                |
| Moderate                                                   | 2,2 | 0,34                | 0,25   | 0,47 | 0,000 | 0,55              | 0,39   | 0,77  | 0,001 | -                |
| High                                                       | 6,2 | 0,38                | 0,21   | 0,70 | 0,002 | 0,56              | 0,30   | 1,05  | 0,071 | -                |
| Previous upper abdominal surgery                           |     |                     |        |      |       |                   |        |       |       | 0,702            |
| No                                                         | 2,0 | 0,29                | 0,22   | 0,37 | 0,000 | 0,52              | 0,39   | 0,69  | 0,000 | -                |
| Yes                                                        | 4,3 | 0,41                | 0,04   | 4,69 | 0,470 | 0,86              | 0,07   | 10,40 | 0,905 | -                |
| Type of admission                                          |     |                     |        |      |       |                   |        |       |       | 0,545            |
| Elective                                                   | 1,5 | 0,33                | 0,23   | 0,50 | 0,000 | 0,48              | 0,32   | 0,72  | 0,000 | -                |
| Emergency                                                  | 3,4 | 0,35                | 0,25   | 0,49 | 0,000 | 0,56              | 0,39   | 0,81  | 0,002 | -                |

<sup>c</sup> There are no 30-day complications in patients with moderately high severity and undergoing laparotomic cholecystectomy

1

1  
2  
3  
4  
5  
6  
7 **Thirty-day complications after laparoscopic or open cholecystectomy: a population-**  
8 **based cohort study in Italy.**  
9

10 **Authors**

11 Nera Agabiti MD, Massimo Stafoggia MS, Marina Davoli MD PhD, Danilo Fusco MS, Anna  
12 Patrizia Barone MD and Carlo A.Perucci MD\*.  
13

14 Department of Epidemiology, Regional Health Service, Lazio Region, Rome, Italy  
15

16 \*National Agency for Regional Health Services, Rome, Italy  
17  
18  
19

20  
21 **Correspondence**

22 Dott.ssa Nera Agabiti

23 Department of Epidemiology, Regional Health Service, Lazio Region  
24

25 Via di S.Costanza 53  
26

27 00198 Rome (Italy)  
28

29 Tel 39-6-83060402  
30

31 Fax 39-6-83060374  
32

33 e:mail: [n.agabiti@deplazio.it](mailto:n.agabiti@deplazio.it)  
34  
35

Field Code Changed

36  
37  
38 **Short running head:** Effectiveness of cholecystectomy  
39

40 **Word count for abstract:** 264  
41

42 **Word count for manuscript:** [29142886](#)  
43  
44

45  
46  
47 This work was supported by the Regional Health Service, Lazio Region on the behalf of  
48

49 P.Re.Val.E. Regional Outcome Evaluation Program. Lazio Region (Italy) [available at](#)  
50

51 <http://www.epidemiologia.lazio.it/prevale11/>  
52  
53  
54  
55  
56  
57  
58  
59  
60

Field Code Changed

1  
2  
3  
4  
5  
6  
7 **Thirty-day complications after laparoscopic or open cholecystectomy: a population-**  
8 **based cohort study in Italy.**  
9

10  
11  
12 **Abstract**

13  
14 **Objective**

15  
16 The objective of the study is to evaluate short-term complications after laparoscopic (LC) or  
17 open cholecystectomy (OC) in patients with gallstones by using linked hospital discharge  
18 data.  
19

20  
21  
22 **Design**

23  
24 Population-based cohort study.

25  
26 **Setting**

27  
28 Data were obtained from the Regional Hospital Discharge Registry Lazio Region in Central  
29 Italy (around 5 million inhabitants) in 2007-2008.  
30

31  
32 **Participants**

33  
34 All patients admitted to hospitals of Lazio with symptomatic gallstones (ICD9-CM = 574)  
35 who underwent LC (ICD9-CM 51.23) or OC (ICD9-CM 51.22).  
36

37  
38 **Outcome measures**

39  
40 1)“30-day surgical-related complications” defined as any complication of the biliary tract  
41 (including post-operative infection, hemorrhage or hematoma or seroma complicating a  
42 procedure, persistent postoperative fistula, perforation of bile duct, disruption of wound); 2)  
43 “30-day systemic complications” defined as any complications of other organs (including  
44 sepsis, infections from other organs, major cardiovascular events and selected adverse  
45 events).  
46  
47  
48  
49

50  
51 **Results**  
52  
53  
54  
55  
56  
57  
58  
59  
60

13,651 patients were included; 86.1% had LC, 13.9% OC. 2.0% experienced surgical-related complications (SRC), 2.1% systemic complications (SC). The Odds Ratio (OR) of complications after LC versus OC was 0.60 ( $p < 0.001$ ) for SRC and 0.52 ( $p < 0.001$ ) for SC. As regards SRC, the advantage of LC was consistent across age categories, severity of gallstones and previous upper abdominal surgery, while there was no advantage among people with emergency admission (OR=0.94,  $p = 0.764$ ). For SC, no significant advantage of LC was seen among very old people (OR=0.99,  $p=0.975$ ) and among those with previous upper abdominal surgery (OR=0.86,  $p=0.905$ ).

### Conclusions

This large observational study confirms that LC is more effective than OC with respect to 30-day complications. Population-based linkage of administrative datasets can enlarge evidence of treatment benefits in clinical practice.

**Key words:** administrative data, cohort study, effectiveness, gallstones, hospital discharge data, laparoscopic cholecystectomy, open cholecystectomy, outcomes, population-based, post-operative complications.

## Article summary

### Article focus

-The advantage of laparoscopic cholecystectomy (LC) approach for the treatment of gallstone versus open surgery (OC) has been shown from RCTs and observational studies.

-The use of linked administrative health records has become one of the most powerful tools in observational studies aimed at comparing treatments.

-We compared laparoscopic and open cholecystectomy in term of 30-day complications using routinely collected databases in Lazio Region (Italy).

### Key messages

-This population-based study contributes to enlarge the evidence on effectiveness of LC in a real-life setting.

-As regards surgical-related complications, the advantage of LC was consistent across age categories, severity of gallstones and previous upper abdominal surgery, while there was no advantage among people with emergency admission.

-For systemic complications, no significant advantage of LC was seen among very old people and among those with previous upper abdominal surgery.

### Strengths and limitations

-Population-based design, 30-day outcomes, large numbers and robustness of analytic procedures are the main strengths.

-It contributes to the debate on the complex methodology to estimated risk of adverse events after surgery using secondary databases to monitor quality of care.

5

-The use of ICD-9-CM codes in the definition of severity of disease presentation and of complications is a major limit.

For peer review only

## Introduction

Comparative effectiveness research is becoming central to monitor real-life impact of treatments and support public health decisions (1, 2). Although the basic concept of comparing therapies is not new, over the last few years many initiatives have been implemented in several countries to provide large-scale evidence on benefits and harms of different treatments (3-5). The use of linked administrative health records has become one of the most powerful tools in observational studies aimed at comparing treatments. They include hospital in-patients records, birth and death registrations, outpatient care records, dispensed pharmacy drugs (6-9).

In the Lazio Region (around 5.000.000 inhabitants) the P.Re.Val.E. Project (*Regional Program for Assessing the Outcomes of Health-care Interventions*) was launched in 2005. Its aims are: to measure the quality of health care provided in the Lazio Region, to describe variability of care provision across institutions and populations and to compare effectiveness of treatments for different medical and surgical conditions (10,11). Over 60 outcomes indicators are calculated based on data obtained from record-linkage procedures of different health systems. The results are periodically updated and publicly disseminated with discussion on critical methodological points.

Cholecystectomy is one of the most common abdominal surgical procedures in developed countries. Since its introduction in the late '80s, laparoscopic cholecystectomy (LC) has replaced open cholecystectomy (OC) as the treatment of choice for symptomatic gallstones (12, 13). Beneficial effects of LC have been demonstrated in studies showing the advantages from real-life settings using secondary databases (9,14-19). In the present study we aimed at developing a methodology to measure short-term complications after LC or OC using large administrative databases on behalf of the P.Re.Val.E. Secondly, we tested the hypothesis that



the advantages of LC versus OC could vary according to age and clinical patients' characteristics.

## Methods

### Source of data

Data was derived from the Lazio Hospital Information System (HIS), which provides information on patients' demographic data (gender, age, place of birth, place of residence), admission and discharge dates, discharge diagnoses (up to 6) and medical procedures or surgical interventions ((up to 6) according to the International Classification of disease, Ninth Revision, Clinical Modification (ICD-9-CM), status at discharge (alive, dead, transferred to another hospital), ward(s) of stay, date(s) of in-hospital transfer, and a regional code corresponding to the admitting facility for patients discharged from all public and private hospital of the Lazio Region (5.759.839 inhabitants).

### Study population

All hospital admissions with a primary or secondary diagnosis of gallstones (International Classification of Diseases 9<sup>th</sup> Revision, Clinical Modification - ICD9-CM = 574) and a procedure code of cholecystectomy (ICD9-CM 51.22, 51.23), occurred in private and public hospitals of the Lazio Region between January 2007 and September 2008 were included, for a total of 16,432 cases (age 18+ years). We a priori decided not to include codes for partial cholecystectomy (ICD-9-CM 51.21 and 51.24) to increase the specificity of our exposure. Information was retrieved from the HIS. In order to increase the case specificity, several exclusion criteria were applied including long-term hospitalizations, rehabilitations, day-

1  
2  
3  
4  
5  
6  
7 hospitals, hospitalizations for delivery or trauma or cancer, hospitalizations with abdominal  
8 surgical procedures other than cholecystectomy. The final population consisted of 13,651  
9 subjects (**Figure 1**). See the online **Supplementary Data** (Part 1) for details on the exclusion  
10 criteria and ICD9-CM codes. [According to the Regional Law, the present study, which was](#)  
11 [based on anonymous computer records from health information systems, did not require for](#)  
12 [ethical approval.](#)  
13  
14  
15  
16  
17  
18  
19

#### 20 Patient-level risk factors

21  
22 The following characteristics were considered for each patient: Age (<70; 70-79; >=80 years  
23 old); Gender; Severity of gallstones: it was classified as *low* (not-complicated), *moderate*  
24 (presence of cholecystitis or biliary tract obstruction), and *high* (presence of both  
25 inflammation and obstruction of the biliary tract); Previous upper abdominal surgery (based  
26 on previous 2-year hospitalizations); Comorbidities (based on previous 2-year  
27 hospitalizations) following validated algorithms (20,21); Type of admission: either *elective* or  
28 *emergency*. See the online **Supplementary Data** (Part 2-4) for details on the ICD-9-CM  
29 codes. The choice of *cut off* for age category was based on previous studies to distinguish  
30 adult and old people (22-24).  
31  
32  
33  
34  
35  
36  
37  
38

#### 39 Outcomes

40  
41 We identified various complications within 30-days after the intervention and grouped them  
42 in two categories: 1) “*30-day surgical-related complications*” defined as any complication of  
43 the biliary tract (including post-operative infection, hemorrhage or hematoma or seroma  
44 complicating a procedure, persistent postoperative fistula, perforation of bile duct, disruption  
45 of wound ()); 2) “*30-day systemic complications*” defined as any complications of other organs  
46 (including sepsis, infections from other organs, major cardiovascular events and  
47  
48  
49  
50  
51  
52  
53  
54  
55  
56  
57  
58  
59  
60

selected adverse events). The complete list of complications with ICD-9-CM codes is reported in the online **Supplementary Data** (Part 5). Among the various complications we included some conditions reported in the list of Patient Safety Indicators recently developed by the Agency for Health Care Research and Quality, while other items were specifically created on the basis of scientific literature on digestive surgery (14-19,25,26). Depending on the type of complication, some ICD9-CM codes were searched in both the index admission and the following ones in the 30-day period after the surgery, others were searched only in later hospitalizations. For example, peritonitis or acute pancreatitis was not counted as complications when reported in the index admission. See the online **Supplementary Data** (Part 5) for details on the ICD9-CM codes. In the case of a subsequent hospitalization occurred out of the study area (for example, in a region other than Lazio), we obtained information through record linkage procedure between hospital information systems. Because of the short follow up time, this happened in a minimal proportion of cases (0.1%). The outcome variables were: “30-day surgical-related complications” and “30-day systemic complications”; they were coded “1” if at least one of the complications within the group was present and “0” if none was recorded.

#### Type of cholecystectomy

As exposure variable we defined “*type of cholecystectomy*” (laparoscopic cholecystectomy, LC vs. open cholecystectomy, OC). In the case of ICD-9-CM codes for both LC and OC (5%), the patient was considered exposed to the open surgical procedure. We could not use the specific ICD-9-code for a case converted from LC to OC (ICD-9-CM code V 64.41) because it was highly under-reported in our Region in the study period.

#### Statistical analysis

Multiple logistic regression models were fitted to estimate the relative risk of 30-day complications (either “surgical-related” or “systemic”) after LC versus OC, adjusting for demographical and clinical risk factors. The two outcome variables were analysed separately. The predictive model was made of two sets of predictors: 1) variables “a priori” chosen as confounders (age, gender, severity of gallstones, previous upper abdominal surgery, and type of admission); 2) variables empirically tested (comorbidities) which were selected using iterative stepwise statistical procedures (27). Once the “best” predictive model was identified for each of the two outcome, the variable “*type of cholecystectomy*” was included, and the adjusted odds ratio (OR) of LC versus open surgery was estimated, with corresponding 95% confidence interval (95% CI) and p-value.

In order to test the hypothesis of an effect modification by age, relative risk estimates for the age groups were derived by adding an interaction term between the age group and the treatment variable in the final multivariate logistic model. We obtained the OR of laparoscopic vs. open surgery within each age stratum by adding the corresponding interaction terms coefficients. This was accomplished by adding the coefficient from the reference category and that from the age stratum of interest, and by computing the corresponding standard error from the corresponding terms of the variance-covariance matrix. Similarly, effect modification was tested with regard to severity of cholelithiasis, previous upper abdominal surgery and type of admission. The corresponding tests of heterogeneity of the stratum-specific risk estimates were computed.

Sensitivity analyses were performed. First, in order to guarantee adequate control of confounding factors we identified and adjusted for all the individual factors associated with the treatment, within the propensity adjustment framework (28). This procedure is a two-step

technique: 1. it estimates the a priori probability of exposure for each subject, based on clinical and demographic characteristics; 2. it standardizes for them in the association between treatment and the study outcome. The individual factors related to the exposure in the present study include age, gender, severity of cholelithiasis, previous upper abdominal surgery, type of admission, cardio-circulatory disease, cerebrovascular disease, COPD or respiratory failure, chronic nephropathy, chronic disease of the liver or pancreas. Second, to take into account the potential heterogeneous experience in laparoscopic surgery across different hospitals because of the patients' clustering within a single institution we perform a multilevel regression model with random intercepts for hospitals (29).

All the statistical analyses were performed using SAS Software version 8.0 (SAS Institute, Inc. SAS/STAT software).

## Results

A description of the study population, overall and by cholecystectomy procedure, is presented in **Table 1**. Over 80% of the patients were younger than 70 years, and moderate to high severity of the gallstones was diagnosed for 61.7%. As compared with patients undergoing LC, those who underwent OC were more likely to be elderly, males, with a more severe baseline disease and more chronic conditions. Furthermore, they were operated in emergency in most of the cases (52.4%), whereas LC was performed in elective hospitalizations much more frequently (73.9%).

**Table 2** reports the relationship between demographic and clinical variables and the occurrence of complications. The adjusted risk of systemic complications increased with age

and was much higher in patients with more severe baseline gallstones, whereas no clear age or severity-related differences in risk emerged with regard to surgical-related 30-day complications, once other co-factors were taken into account. Women were less likely to experience both types of complications. Having had a previous intervention on the upper digestive system seemed to enhance the risk of both surgical-related and systemic complications, though results are not statistically significant due to small power. Finally, the risk of both types of complications was more evident in emergency as opposed to scheduled interventions. Surgical-related complications were higher among subjects with obesity, blood disease, stroke or chronic nephropathy, whereas systemic complications were associated with blood diseases, ischemic heart disease, conduction disorders or dysrhythmias, COPD or respiratory failure, chronic nephropathy, and chronic diseases of the liver or pancreas.

**Table 3** shows the relationship between type of cholecystectomy and outcomes, adjusted for the risk factors identified in Table 2. We report results of the advantage of LC vs. OC (OR, 95% CI) in the cohort and in the each stratum of the variables tested in the models with interaction terms. The incidence of “30-day surgical-related complications” and “30-day systemic complications” was 2.0% and 2.1%, respectively. The odds ratio of surgical related complications for patients who underwent LC as compared to patients with OC was 0.60 ( $p < 0.001$ ). The corresponding figure for systemic complications was 0.52 ( $p < 0.001$ ).

As regards 30-day surgical-related complications, the protective effect of LC vs. OC was consistent across the age category, severity of cholelithiasis and previous upper abdominal surgery, while among people with emergency admission there was no advantage (OR=0.94  $p = 0.764$ ). Similarly, for systemic complications, the superiority of LC vs. OC was consistent regardless level of cholelithiasis severity, and elective/emergency admission, but for those 80+ yrs aged people there was no advantage of LC vs. OC (OR 0.99,  $p = 0.975$ ); also for

patients with previous upper abdominal surgery there was a much weaker advantage (OR=0.86, p=0.905).

When the association between type of cholecystectomy and 30-day complications was adjusted with the propensity adjustment method, results were consistent with those obtained with the risk-adjustment procedure (LC vs. OC OR= 0.61 and OR=0.52 respectively for the two outcomes). Finally, results were similar taking into account patients' clustering within different hospitals (*data not shown*).

## Discussion

From this large observational study based on linked administrative health records - taking into account the disomogeneous distribution of factors related to the probability to be offered open surgery - people who end up having a LC have a better short-term prognosis than those that get an OC for the treatment of gallstones. The superiority of laparoscopic approach in term of 30-day complications is consistent in different age categories, different severity in disease presentation and past history of upper abdominal surgery.

This population-based study contributes to enlarge the evidence on effectiveness of LC in a real-life setting by providing an example from the Southern Europe area. It supports the usefulness of observational approaches. The 30-day outcomes linked to admission represent one strength of this study. Despite RTCs are considered the optimal study design when comparing efficacy of treatments, observational studies provide a picture of treatment under usual circumstances of health-care practice and can answer to the question “*Does it work in practice?*” (3,8). RTCs often have small sample size and may under represent vulnerable

1  
2  
3  
4  
5  
6  
7 patient groups, including elderly patients with multiple comorbidities, children, and young  
8 women, and operate in a highly controlled environment that is far from routine clinical  
9 practice. Our study supports that LC is a reliable approach safer than OC not only in old age  
10 group - confirming previous findings (22, 30) - but also in presence of severe disease  
11 presentation and in patients with past history of upper digestive system surgery. Beneficial  
12 effect of LC as regards systemic complications tends to be lower in 80+ yrs aged in  
13 comparison with younger ages, and in patients with emergency admission in comparison to  
14 elective admissions as regards 30-day surgical-related complications. These data add to the  
15 evidence on the complex relationship between age and outcomes after surgery (22-24,30).  
16  
17  
18  
19  
20  
21  
22  
23  
24  
25

26 A number of potential biases are present. First of all, people in the two groups of patients  
27 analyzed are not homogenous in term of with a higher anesthesia risk due to higher frequency  
28 of elderly and more comorbidities severe patients in the open group in the open group than  
29 in the laparoscopic one. When comparing the effect of the two techniques using two different  
30 populations, the so called “indication bias” may affect study validity (8,31). To limit this  
31 problem we run the propensity adjustment analysis to take into account the different  
32 distribution of factors strongly associated with the probability to receive open surgery in the  
33 study population. This analytical approach confirmed the advantage of laparoscopic vs. open  
34 surgery obtained in the main logistic regression analysis. Another critical point is the potential  
35 different distribution of laparoscopic experience across surgeons; however a sensitivity  
36 analysis which took into account this point led to similar results. The use of ICD-9-CM codes  
37 in the definition of severity of disease presentation and of complications is another major  
38 limit. Discharge abstract data have little insight into clinical details and do not inform on the  
39 temporal relationship of the clinical conditions and processes, then defining complications is a  
40 difficult task (32). In this respect, we tried to improve the accuracy of our measures both 1)  
41  
42  
43  
44  
45  
46  
47  
48  
49  
50  
51  
52  
53  
54  
55  
56  
57  
58  
59  
60



1  
2  
3  
4  
5  
6  
7 applying a specific coding algorithm with subsequent hospital admissions used to retrieve  
8 adverse events and 2) excluding in the “count” of complications specific items if reported in  
9 the index only (i.e. peritonitis) because of the difficulty to determine if it was already present  
10 at admission. Moreover, we cannot exclude an under-notification of complications – a major  
11 limit of our source of data - but it is unlikely that is influenced by the type of surgery. Another  
12 major problem is the potential misclassification of exposure since we were not able to  
13 measure the occurrence of conversion of LC to OC. The number of people that were switched  
14 from LC to OP is low in comparison to figures documented in other studies and it may  
15 represent a severe source of bias in our study (30,33).  
16  
17  
18  
19  
20  
21  
22  
23  
24  
25

26 Beneficial effects of the laparoscopic approach versus traditional open surgery for the  
27 treatment of gallstones come from various randomized controlled trials (RCTs) (34). They  
28 found significant shorter hospital stay and quicker convalescence associated with LC but no  
29 differences in mortality, complications and operative time between the two procedures. A  
30 better trend with the laparoscopic approach, including morbidity and mortality, comes from  
31 observational studies. From a surveillance system in eight Swiss hospitals, surgical site  
32 infections were less common in laparoscopic approach in comparison to traditional open  
33 surgery (0.5% in LC vs. 1.8% in OC) (35). Significantly lower incidence of venous  
34 thromboembolism and surgical site-infections in laparoscopic cases versus open cases was  
35 observed in a large administrative dataset-based study in USA (14, 15). National estimates  
36 for LC in USA showed an increase in LC from 52% in 1991 to 75% in 2000 with a constantly  
37 low mortality rate and a decrease in biliary reconstruction rate over time (16). On the basis of  
38 the 1997-2006 trend analysis by the same authors LC was associated with a low mortality  
39 rate (mean value in the period: 0.52%) while OC with a significantly higher rate  
40 (corresponding value: 4.9%) (9). In a retrospective study using Medicare beneficiaries  
41  
42  
43  
44  
45  
46  
47  
48  
49  
50  
51  
52  
53  
54  
55  
56  
57  
58  
59  
60

common bile duct (CBD) injury during cholecystectomy was associated with a significant higher risk of death in comparison to cholecystectomy without CBD injury over a 9.2 year follow up period (17). From a Swiss 1995-2005 hospital database analysis the incidence rate of bile duct injury after LC was 0.3% and did not change over time (18). The incidence of conversion to OC after LC in all hospitals in England from 2005 to 2006 has been examined using Hospital Episode Statistics and resulted 4.6% for elective procedures and 9.4% for emergency procedures) (19).

Population-based linkage of routinely collected health data represents a precious tool to support large- scale and real-world practice evaluation by measuring specific outcomes and comparing them over time and across populations. Together with results from experimental research settings, the conclusions of research studies evaluating clinical outcomes through data linkage systems should be successfully incorporated into practice by clinicians/surgeons.

## ACKNOWLEDGMENTS

We are very grateful to Roberta Macci and Sandra Magliolo for their support in finding the cited articles and to Anna Kohn (Azienda Ospedaliera S.Camillo, Rome Italy) for her precious comments.

For peer review only

**FUNDING**

This work was supported by the Regional Health Service, Lazio Region on the behalf of *P.Re.Val.E. Regional Outcome Evaluation Program*. Lazio Region (Italy).

[A-vailable at http://www.epidemiologia.lazio.it/prevale11/](http://www.epidemiologia.lazio.it/prevale11/)

Field Code Changed

**AUTHOR'S CONTRIBUTION**

All Authors participated in the study design, in defining the study protocol and methodology, in acquisition of data, in planning the analyses, in interpreting the results. M.S. performed the analyses. N.A and M.S. drafted the manuscript.

**REFERENCES**

1. Madigan D, Ryan P. What can we really learn from observational studies? The need for empirical assessment of methodology for active drug safety surveillance and comparative effectiveness research. *Epidemiology* 2011; 22: 629-31.
2. Mullins CD, Abdulhalim AM, Lavalley DC. Continuous patient engagement in comparative effectiveness research. *JAMA* 2012; 307:1587-8.
3. Agency for Health Care Research and Quality (AHRQ) – Effective Health Care Program.  
[Available at www.effectivehealthcare.ahrq.gov](http://www.effectivehealthcare.ahrq.gov)
4. Fink AS, Campbell DA Jr, Mentzer RM Jr et al. The National Surgical Quality Improvement Program in non-veterans administration hospitals: initial demonstration of feasibility. *Ann Surg* 2002; 236: 344-53; discussion 353-4.
5. Fleetcroft R, Steel N, Cookson R et al. Incentive payments are not related to expected health gain in the pay for performance scheme for UK primary care: cross-sectional analysis. *BMC Health Serv Res* 2012; 12:94.
6. Hall SE, Holman CD, Finn J et al. Improving the evidence base for promoting quality and equity of surgical care using population-based linkage of administrative health records. *Int J Qual Health Care* 2005; 17: 415-420. Review.
7. Hanley JA, Dendukuri N. Efficient sampling approaches to address confounding in database studies. *Stat Methods Med Res* 2009; 18:81-105. Review.

Field Code Changed

1  
2  
3  
4  
5  
6  
7 8. Schneeweiss S. Developments in post-marketing comparative effectiveness research.

8  
9 Clin Pharmacol Ther 2007; 82:143-56.. Review.

10  
11  
12  
13  
14 9. Dolan JP, Diggs BS, Sheppard BC et al. The national mortality burden and significant  
15 factors associated with open and laparoscopic cholecystectomy: 1997-2006. J Gastrointest  
16 Surg 2009; 13:2292-2301.

17  
18  
19  
20  
21  
22  
23  
24 10. Fusco D, Barone AP, Sorge C et al. P.Re.Val.E.: Outcome research program for the  
25 evaluation of health care quality in Lazio, Italy. BMC Health Serv Res 2012; 12:25.

26  
27  
28  
29  
30 11. Pinnarelli L, Nuti S, Sorge C, et al. What drives hospital performance? The impact of  
31 comparative outcome evaluation of patients admitted for hip fracture in two Italian regions.  
32 BMJ Qual Saf 2012; 21: 127-34.

33  
34  
35  
36  
37 12. Keulemans YC, Venneman NG, Gouma DJ et al. New strategies for the treatment of  
38 gallstone disease. Scand J Gastroenterol Suppl 2002; 236:87-90. Review.

39  
40  
41  
42  
43 13. Williams EJ, Green J, Beckingham I et al. British Society of Gastroenterology -  
44 Guidelines on the management of common bile duct stones (CBDS).  
45 Gut 2008; 57:1004-21. Review.

46  
47  
48  
49  
50 14. Varela JE, Wilson SE, Nguyen NT. Laparoscopic surgery significantly reduces surgical-  
51 site infections compared with open surgery. Surg Endosc 2010; 24: 270-276  
52  
53  
54  
55  
56  
57  
58  
59  
60

- 1  
2  
3  
4  
5  
6  
7 15. Nguyen NT, Hinojosa MW, Fayad C et al. Laparoscopic surgery is associated with a  
8 lower incidence of venous thromboembolism compared with open surgery. *Ann Surg* 2007;  
9 246: 1021-1027.  
10  
11  
12  
13  
14 16. Dolan JP, Diggs BS, Sheppard BC, Hunter JG Ten-year trend in the national volume of  
15 bile duct injuries requiring operative repair. *Surg Endosc*. 2005; 19: 967-73..  
16  
17  
18  
19  
20 17. Flum DR, Cheadle A, Prela C, Dellinger EP, Chan L Bile duct injury during  
21 cholecystectomy and survival in medicare beneficiaries. *JAMA* 2003; 290:2168-73.  
22  
23  
24  
25  
26 18. Giger U, Ouaiissi M, Schmitz SF, Krähenbühl S, Krähenbühl L. Bile duct injury and use of  
27 cholangiography during laparoscopic cholecystectomy. *Br J Surg* 2011; 98:391-396.  
28  
29  
30  
31  
32 19. Ballal M, David G, Willmott S, Corless DJ et al. Conversion after laparoscopic  
33 cholecystectomy in England. *Surg Endosc* 2009; 23: 2338-2344.  
34  
35  
36  
37  
38 20. Quan H, Sundararajan V, Halfon P et al. Coding algorithms for defining comorbidities in  
39 ICD-9-CM and ICD-10 administrative data. *Med Care* 2005;43:1130-9.  
40  
41  
42  
43 21. Armitage JN, van der Meulen JH - Royal College of Surgeons Co-morbidity Consensus  
44 Group. Identifying co-morbidity in surgical patients using administrative data with the Royal  
45 College of Surgeons Charlson Score. *Br J Surg* 2010; 97:772-781.  
46  
47  
48  
49  
50  
51 22. Yetkin G, Uludag M, Oba S et al. Laparoscopic cholecystectomy in elderly patients. *JSLs*  
52 2009; 13:587-591.  
53  
54  
55  
56  
57  
58  
59  
60

- 1  
2  
3  
4  
5  
6  
7  
8  
9 23. Russ AJ, Obma KL, Rajamanickam V et al. Laparoscopy Improves Short-term Outcomes  
10 After Surgery for Diverticular Disease. *Gastroenterology* 2010; 138: 2267-2274.  
11  
12  
13  
14 24. Pessaux P, Tuech JJ, Derouet N et al. Laparoscopic cholecystectomy in the elderly: a  
15 prospective study. *Surg Endosc*. 2000; 14:1067-1069.  
16  
17  
18  
19  
20 25. Kaafarani HM, Rosen AK. Using administrative data to identify surgical adverse events:  
21 an introduction to the Patient Safety Indicators. *Am J Surg* 2009; 198(5 Suppl):S63-S68  
22  
23  
24  
25  
26 26. Jung MA, Banerjee SN. Administrative coding data and health care-associated  
27 infections. *Clin Infect Dis* 2009; 49:949-955. Review  
28  
29  
30  
31  
32 27. Arcà M, Fusco D, Barone AP et al. Risk adjustment and outcome research. Part I.  
33  
34 *J Cardiovasc Med (Hagerstown)* 2006;7: 682-90.  
35  
36  
37  
38 28. D'Agostino RB. Tutorials in biostatistics. Propensity score methods for bias reduction in  
39 the comparison of a treatment to a non-randomized control group. *Statist Med* 1998; 17:2265-  
40 2281.  
41  
42  
43  
44  
45 29. Harvey Goldstein. *Multilevel statistical models*. 3rd Edition. 2003.  
46  
47 Oxford University Press Inc., New York, NY10016  
48  
49  
50  
51 30. Kim HO, Yun JW, Shin JH et al. Outcome of laparoscopic cholecystectomy is not  
52 influenced by chronological age in the elderly. *World J Gastroenterol* 2009; 15:722-726.  
53  
54  
55  
56  
57  
58  
59  
60



- 1  
2  
3  
4  
5  
6  
7  
8  
9 31. Rothman KJ, Lash TL, Greenland S. Modern Epidemiology 3<sup>rd</sup> edition, Publisher:  
10 Lippincott Williams & Wilkins, 2008  
11  
12  
13  
14 32. Glance LG, Dick AW, Osler TM et al. Accuracy of hospital report cards based on  
15 administrative data. Health Serv Res 2006; 41(4 Pt 1):1413-1437  
16  
17  
18  
19 33. Shamiyeh A, Danis J, Wayand W et al. 14-year analysis of laparoscopic  
20 cholecystectomy: conversion--when and why? Surg Laparosc Endosc Percutan Tech. 2007  
21 ;17:271-6.  
22  
23  
24  
25  
26  
27 34. Keus F, Gooszen HG, van Laarhoven CJ. Open, small-incision, or laparoscopic  
28 cholecystectomy for patients with symptomatic cholecystolithiasis. An overview of Cochrane  
29 Hepato-Biliary Group reviews. Cochrane Database Syst Rev 2010; (1):CD008318.  
30  
31  
32  
33  
34  
35 35. Romy S, Eisenring MC, Bettschart V et al. Laparoscope use and surgical site infections in  
36 digestive surgery. Ann Surg 2008; 247:627-632.  
37  
38  
39  
40  
41  
42  
43  
44  
45  
46  
47  
48  
49  
50  
51  
52  
53  
54  
55  
56  
57  
58  
59  
60

Figure 1. Selection of the study population

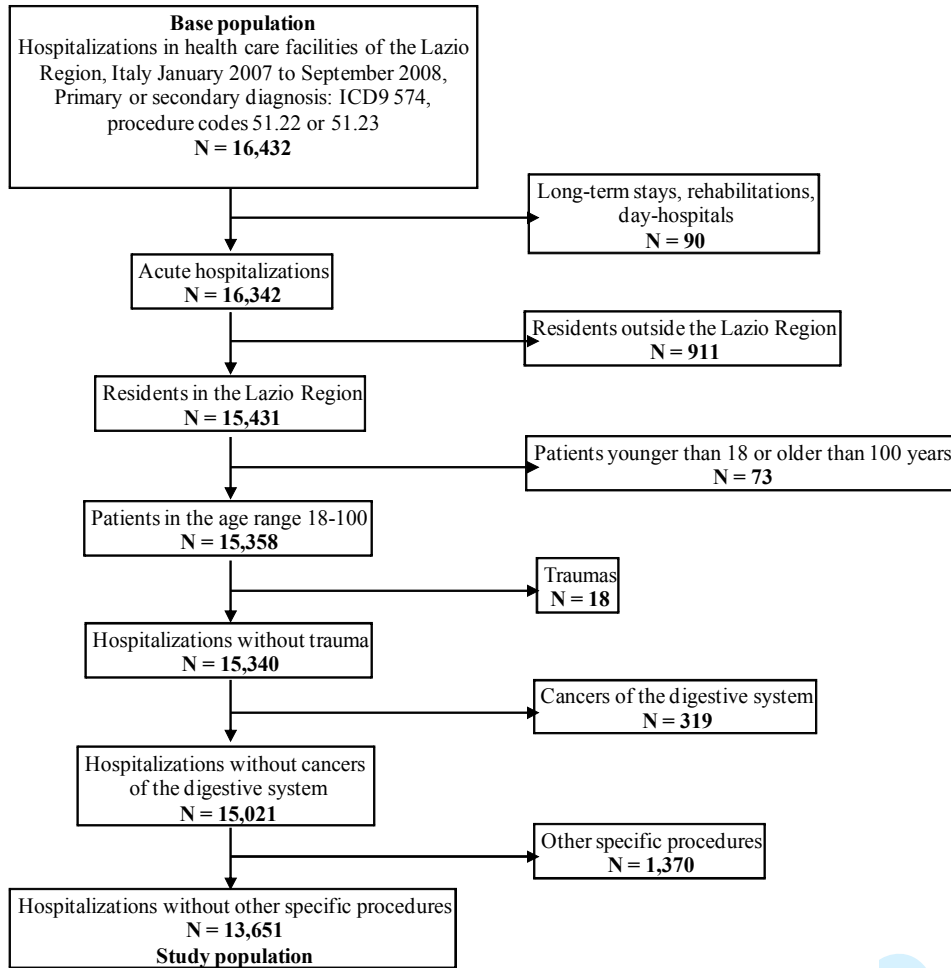

**Table 1.** Study population, overall and by cholecystectomy procedure: distribution by age, gender, severity of cholelithiasis, previous upper abdominal surgery, type of admission, comorbidities - Lazio Region, Italy, January 2007-September 2008

| Patient characteristics                 | Laparoscopic cholecystectomy             |             | Open cholecystectomy |             | Total         |              |      |
|-----------------------------------------|------------------------------------------|-------------|----------------------|-------------|---------------|--------------|------|
|                                         | N                                        | %           | N                    | %           | N             | %            |      |
| <b>Total</b>                            | <b>11.752</b>                            | <b>86,1</b> | <b>1.899</b>         | <b>13,9</b> | <b>13.651</b> | <b>100,0</b> |      |
| <b>Age (years)</b>                      |                                          |             |                      |             |               |              |      |
|                                         | <70                                      | 9.913       | 84,4                 | 1.162       | 61,2          | 11.075       | 81,1 |
|                                         | 70-79                                    | 1.543       | 13,1                 | 485         | 25,5          | 2.028        | 14,9 |
|                                         | ≥ 80                                     | 296         | 2,5                  | 252         | 13,3          | 548          | 4,0  |
|                                         |                                          | 11.752      |                      |             |               |              |      |
| <b>Gender</b>                           |                                          |             |                      |             |               |              |      |
|                                         | Men                                      | 4.349       | 37,0                 | 979         | 51,6          | 5.328        | 39,0 |
|                                         | Women                                    | 7.403       | 63,0                 | 920         | 48,4          | 8.323        | 61,0 |
| <b>Severity of cholelithiasis</b>       |                                          |             |                      |             |               |              |      |
|                                         | Low                                      | 4.767       | 40,6                 | 470         | 24,7          | 5.237        | 38,4 |
|                                         | Moderate                                 | 6.456       | 54,9                 | 1.200       | 63,2          | 7.656        | 56,1 |
|                                         | High                                     | 529         | 4,5                  | 229         | 12,1          | 758          | 5,6  |
| <b>Previous upper abdominal surgery</b> |                                          |             |                      |             |               |              |      |
|                                         | No                                       | 11.714      | 99,7                 | 1.867       | 98,3          | 13.581       | 99,5 |
|                                         | Yes                                      | 38          | 0,3                  | 32          | 1,7           | 70           | 0,5  |
| <b>Type of admission</b>                |                                          |             |                      |             |               |              |      |
|                                         | Elective                                 | 8.690       | 73,9                 | 903         | 47,6          | 9.593        | 70,3 |
|                                         | Emergency                                | 3.062       | 26,1                 | 996         | 52,4          | 4.058        | 29,7 |
| <b>Comorbidities</b>                    |                                          |             |                      |             |               |              |      |
|                                         | Cancer                                   | 232         | 2,0                  | 75          | 3,9           | 307          | 2,2  |
|                                         | Diabetes                                 | 268         | 2,3                  | 100         | 5,3           | 368          | 2,7  |
|                                         | Obesity                                  | 115         | 1,0                  | 25          | 1,3           | 140          | 1,0  |
|                                         | Blood disease                            | 146         | 1,2                  | 62          | 3,3           | 208          | 1,5  |
|                                         | Hypertension                             | 842         | 7,2                  | 247         | 13,0          | 1.089        | 8,0  |
|                                         | Ischemic heart disease                   | 246         | 2,1                  | 107         | 5,6           | 353          | 2,6  |
|                                         | Past coronary revascularization          | 63          | 0,5                  | 22          | 1,2           | 85           | 0,6  |
|                                         | Heart failure                            | 47          | 0,4                  | 41          | 2,2           | 88           | 0,6  |
|                                         | Other heart disease                      | 158         | 1,3                  | 76          | 4,0           | 234          | 1,7  |
|                                         | Conduction disorders or dysrhythmia      | 250         | 2,1                  | 95          | 5,0           | 345          | 2,5  |
|                                         | Cerebrovascular disease                  | 146         | 1,2                  | 74          | 3,9           | 220          | 1,6  |
|                                         | Vascular disease                         | 91          | 0,8                  | 38          | 2,0           | 129          | 0,9  |
|                                         | COPD* or respiratory failure             | 189         | 1,6                  | 84          | 4,4           | 273          | 2,0  |
|                                         | Chronic nephropathy                      | 68          | 0,6                  | 46          | 2,4           | 114          | 0,8  |
|                                         | Chronic disease of the liver or pancreas | 219         | 1,9                  | 70          | 3,7           | 289          | 2,1  |

\*Chronic Obstructive Pulmonary Disease

Table 2. Factors related to the incidence of 30-day complications after cholecystectomy. OR crude and adjusted, p-values - Lazio Region, Italy, January 2007-September 2008 (N = 13,651)

| Patient characteristics                   | 30-day surgical-related complications (N=278, 2.0%) |                     |        |      |                   |        | 30-day systemic complications (N=280, 2.1%) |      |                     |        |      |                   |        |       |       |      |       |      |       |
|-------------------------------------------|-----------------------------------------------------|---------------------|--------|------|-------------------|--------|---------------------------------------------|------|---------------------|--------|------|-------------------|--------|-------|-------|------|-------|------|-------|
|                                           | %                                                   | OR <sub>crude</sub> | 95% CI | p    | OR <sub>adj</sub> | 95% CI | p                                           | %    | OR <sub>crude</sub> | 95% CI | p    | OR <sub>adj</sub> | 95% CI | p     |       |      |       |      |       |
| Age (years)                               |                                                     |                     |        |      |                   |        |                                             |      |                     |        |      |                   |        |       |       |      |       |      |       |
|                                           | < 70                                                | 1.8                 | 1.00   | -    | -                 | 1.00   | -                                           | -    | 1.5                 | 1.00   | -    | -                 | 1.00   | -     |       |      |       |      |       |
|                                           | 70 - 79                                             | 2.9                 | 1.62   | 1.21 | 2.18              | 0.001  | 1.36                                        | 1.00 | 1.83                | 0.048  | 3.9  | 2.68              | 2.04   | 3.52  | 0.000 | 2.01 | 1.51  | 2.67 | 0.000 |
|                                           | ≥ 80                                                | 3.3                 | 1.84   | 1.13 | 3.00              | 0.015  | 1.21                                        | 0.72 | 2.03                | 0.475  | 7.1  | 5.13              | 3.58   | 7.36  | 0.000 | 2.79 | 1.87  | 4.14 | 0.000 |
| Gender                                    |                                                     |                     |        |      |                   |        |                                             |      |                     |        |      |                   |        |       |       |      |       |      |       |
|                                           | Men                                                 | 2.5                 | 1.00   | -    | -                 | 1.00   | -                                           | -    | 2.6                 | 1.00   | -    | -                 | 1.00   | -     |       |      |       |      |       |
|                                           | Women                                               | 1.7                 | 0.69   | 0.55 | 0.88              | 0.002  | 0.75                                        | 0.59 | 0.96                | 0.022  | 1.7  | 0.66              | 0.52   | 0.84  | 0.001 | 0.80 | 0.62  | 1.02 | 0.070 |
| Severity of cholelithiasis                |                                                     |                     |        |      |                   |        |                                             |      |                     |        |      |                   |        |       |       |      |       |      |       |
|                                           | Low                                                 | 1.9                 | 1.00   | -    | -                 | 1.00   | -                                           | -    | 1.2                 | 1.00   | -    | -                 | 1.00   | -     |       |      |       |      |       |
|                                           | Moderate                                            | 2.0                 | 1.08   | 0.84 | 1.40              | 0.538  | 0.96                                        | 0.74 | 1.24                | 0.733  | 2.2  | 1.84              | 1.38   | 2.46  | 0.000 | 1.55 | 1.15  | 2.08 | 0.004 |
|                                           | High                                                | 3.7                 | 2.03   | 1.32 | 3.14              | 0.001  | 1.43                                        | 0.91 | 2.24                | 0.122  | 6.2  | 5.30              | 3.59   | 7.83  | 0.000 | 3.40 | 2.26  | 5.11 | 0.000 |
| Previous upper abdominal surgery          |                                                     |                     |        |      |                   |        |                                             |      |                     |        |      |                   |        |       |       |      |       |      |       |
|                                           | No                                                  | 2.0                 | 1.00   | -    | -                 | 1.00   | -                                           | -    | 2.0                 | 1.00   | -    | -                 | 1.00   | -     |       |      |       |      |       |
|                                           | Yes                                                 | 5.7                 | 2.94   | 1.07 | 8.13              | 0.037  | 2.29                                        | 0.81 | 6.51                | 0.119  | 4.3  | 2.15              | 0.67   | 6.88  | 0.197 | 1.72 | 0.52  | 5.74 | 0.376 |
| Type of admission                         |                                                     |                     |        |      |                   |        |                                             |      |                     |        |      |                   |        |       |       |      |       |      |       |
|                                           | Elective                                            | 1.6                 | 1.00   | -    | -                 | 1.00   | -                                           | -    | 1.5                 | 1.00   | -    | -                 | 1.00   | -     |       |      |       |      |       |
|                                           | Emergency                                           | 3.0                 | 1.85   | 1.45 | 2.35              | 0.000  | 1.66                                        | 1.29 | 2.13                | 0.000  | 3.4  | 2.34              | 1.85   | 2.97  | 0.000 | 1.64 | 1.27  | 2.11 | 0.000 |
| Comorbidities (presence of the condition) |                                                     |                     |        |      |                   |        |                                             |      |                     |        |      |                   |        |       |       |      |       |      |       |
|                                           | Cancer                                              | 2.6                 | 1.30   | 0.64 | 2.64              | 0.476  | -                                           | -    | 3.6                 | 1.81   | 0.98 | 3.34              | 0.059  | -     | -     | -    | -     | -    | -     |
|                                           | Diabetes                                            | 3.3                 | 1.65   | 0.92 | 2.97              | 0.065  | -                                           | -    | 4.4                 | 2.24   | 1.34 | 3.75              | 0.002  | -     | -     | -    | -     | -    | -     |
|                                           | Obesity                                             | 5.0                 | 2.57   | 1.19 | 5.55              | 0.016  | 2.35                                        | 1.29 | 2.13                | 0.034  | 4.3  | 2.16              | 0.95   | 4.94  | 0.067 | -    | -     | -    | -     |
|                                           | Blood disease                                       | 5.8                 | 3.03   | 1.67 | 5.50              | 0.000  | 2.09                                        | 1.11 | 3.93                | 0.022  | 7.7  | 4.16              | 2.46   | 7.03  | 0.000 | 1.96 | 1.09  | 3.51 | 0.024 |
|                                           | Hypertension                                        | 2.9                 | 1.48   | 1.00 | 2.13              | 0.050  | -                                           | -    | 4.0                 | 2.20   | 1.58 | 3.05              | 0.000  | -     | -     | -    | -     | -    | -     |
|                                           | Ischemic heart disease                              | 2.8                 | 1.42   | 0.75 | 2.69              | 0.286  | -                                           | -    | 7.4                 | 4.08   | 2.69 | 6.20              | 0.000  | 1.74  | 1.09  | 2.78 | 0.020 | -    | -     |
|                                           | Past coronary revascularization                     | 2.4                 | 1.16   | 0.28 | 4.74              | 0.836  | -                                           | -    | 9.4                 | 5.08   | 2.43 | 10.62             | 0.000  | -     | -     | -    | -     | -    | -     |
|                                           | Heart failure                                       | 2.3                 | 1.12   | 0.27 | 4.57              | 0.875  | -                                           | -    | 4.6                 | 2.29   | 0.83 | 6.29              | 0.107  | -     | -     | -    | -     | -    | -     |
|                                           | Other heart disease                                 | 3.4                 | 1.72   | 0.84 | 3.52              | 0.136  | -                                           | -    | 6.8                 | 3.66   | 2.17 | 6.16              | 0.000  | -     | -     | -    | -     | -    | -     |
|                                           | Conduction disorder or dysrhythmia                  | 4.1                 | 2.09   | 1.21 | 3.62              | 0.008  | -                                           | -    | 7.0                 | 3.81   | 2.47 | 5.88              | 0.000  | 1.73  | 1.07  | 2.79 | 0.025 | -    | -     |
|                                           | Cerebrovascular disease                             | 5.9                 | 3.12   | 1.78 | 5.54              | 0.000  | 1.98                                        | 1.09 | 3.60                | 0.025  | 7.7  | 4.19              | 2.52   | 6.98  | 0.000 | -    | -     | -    | -     |
|                                           | Vascular disease                                    | 0.8                 | 0.37   | 0.05 | 2.68              | 0.328  | -                                           | -    | 8.5                 | 4.59   | 2.45 | 8.62              | 0.000  | -     | -     | -    | -     | -    | -     |
|                                           | COPD or respiratory failure                         | 2.6                 | 1.27   | 0.60 | 2.72              | 0.534  | -                                           | -    | 7.7                 | 4.22   | 2.66 | 6.70              | 0.000  | 2.02  | 1.23  | 3.31 | 0.006 | -    | -     |
|                                           | Chronic nephropathy                                 | 9.7                 | 5.31   | 2.82 | 10.00             | 0.000  | 3.24                                        | 1.65 | 6.36                | 0.001  | 10.5 | 5.82              | 3.16   | 10.72 | 0.000 | 2.27 | 1.15  | 4.46 | 0.018 |
|                                           | Chronic disease of the liver or pancreas            | 3.5                 | 1.75   | 0.92 | 3.33              | 0.087  | -                                           | -    | 4.8                 | 2.51   | 1.45 | 4.35              | 0.001  | 1.97  | 1.11  | 3.48 | 0.020 | -    | -     |

**Table 3.** Association between type of cholecystectomy and 30-day complications: OR and p-values from crude model, risk-adjusted model, and models with interaction with age group, severity of cholelithiasis, previous upper abdominal surgery and type of admission; p value of heterogeneity of the strata-specific estimates - Lazio Region, Italy, January 2007 - September 2008

|                                                            | %   | OR <sub>crude</sub> | 95% CI | p    | OR <sub>adj</sub> | 95% CI | p    | P <sub>het</sub> |       |
|------------------------------------------------------------|-----|---------------------|--------|------|-------------------|--------|------|------------------|-------|
| <u>30-day surgical-related complications: N=278, %=2.0</u> |     |                     |        |      |                   |        |      |                  |       |
| Open cholecystectomy                                       | 3,9 | 1,00                | -      | -    | 1,00              | -      | -    | -                | -     |
| Laparoscopic cholecystectomy                               | 1,7 | 0,44                | 0,33   | 0,57 | 0,000             | 0,60   | 0,44 | 0,80             | 0,001 |
| Age (years)                                                |     |                     |        |      |                   |        |      |                  | 0,917 |
| < 70                                                       | 1,8 | 0,49                | 0,35   | 0,71 | 0,000             | 0,62   | 0,43 | 0,90             | 0,012 |
| 70 - 79                                                    | 2,9 | 0,45                | 0,26   | 0,76 | 0,003             | 0,57   | 0,33 | 0,98             | 0,043 |
| ≥ 80                                                       | 3,3 | 0,41                | 0,15   | 1,12 | 0,082             | 0,51   | 0,18 | 1,38             | 0,184 |
| Severity of cholelithiasis                                 |     |                     |        |      |                   |        |      |                  | 0,053 |
| Low                                                        | 1,9 | 0,37                | 0,22   | 0,61 | 0,000             | 0,46   | 0,28 | 0,77             | 0,003 |
| Moderate                                                   | 2,0 | 0,58                | 0,40   | 0,85 | 0,005             | 0,78   | 0,53 | 1,16             | 0,224 |
| High                                                       | 3,7 | 0,24                | 0,11   | 0,53 | 0,000             | 0,30   | 0,13 | 0,68             | 0,004 |
| Previous upper abdominal surgery                           |     |                     |        |      |                   |        |      |                  | 0,654 |
| No                                                         | 2,0 | 0,45                | 0,34   | 0,59 | 0,000             | 0,60   | 0,44 | 0,81             | 0,001 |
| Yes                                                        | 5,7 | 0,26                | 0,03   | 2,64 | 0,256             | 0,36   | 0,03 | 3,69             | 0,388 |
| Type of admission                                          |     |                     |        |      |                   |        |      |                  | 0,001 |
| Elective                                                   | 1,6 | 0,32                | 0,22   | 0,46 | 0,000             | 0,37   | 0,25 | 0,55             | 0,000 |
| Emergency                                                  | 3,0 | 0,76                | 0,51   | 1,13 | 0,178             | 0,94   | 0,62 | 1,42             | 0,764 |
| <u>30-day systemic complications: N=280, %=2.1</u>         |     |                     |        |      |                   |        |      |                  |       |
| Open cholecystectomy                                       | 5,2 | 1,00                | -      | -    | 1,00              | -      | -    | -                | -     |
| Laparoscopic cholecystectomy                               | 1,6 | 0,29                | 0,23   | 0,37 | 0,000             | 0,52   | 0,40 | 0,69             | 0,000 |
| Age (years)                                                |     |                     |        |      |                   |        |      |                  | 0,136 |
| < 70                                                       | 1,5 | 0,34                | 0,24   | 0,49 | 0,000             | 0,47   | 0,32 | 0,68             | 0,000 |
| 70 - 79                                                    | 3,9 | 0,35                | 0,22   | 0,55 | 0,000             | 0,47   | 0,29 | 0,75             | 0,002 |
| ≥ 80                                                       | 7,1 | 0,71                | 0,37   | 1,37 | 0,309             | 0,99   | 0,50 | 1,94             | 0,975 |
| Severity of cholelithiasis                                 |     |                     |        |      |                   |        |      |                  | 0,755 |
| Low                                                        | 1,2 | 0,29                | 0,16   | 0,51 | 0,000             | 0,43   | 0,24 | 0,77             | 0,005 |
| Moderate                                                   | 2,2 | 0,34                | 0,25   | 0,47 | 0,000             | 0,55   | 0,39 | 0,77             | 0,001 |
| High                                                       | 6,2 | 0,38                | 0,21   | 0,70 | 0,002             | 0,56   | 0,30 | 1,05             | 0,071 |
| Previous upper abdominal surgery                           |     |                     |        |      |                   |        |      |                  | 0,702 |
| No                                                         | 2,0 | 0,29                | 0,22   | 0,37 | 0,000             | 0,52   | 0,39 | 0,69             | 0,000 |
| Yes                                                        | 4,3 | 0,41                | 0,04   | 4,69 | 0,470             | 0,86   | 0,07 | 10,40            | 0,905 |
| Type of admission                                          |     |                     |        |      |                   |        |      |                  | 0,545 |
| Elective                                                   | 1,5 | 0,33                | 0,23   | 0,50 | 0,000             | 0,48   | 0,32 | 0,72             | 0,000 |
| Emergency                                                  | 3,4 | 0,35                | 0,25   | 0,49 | 0,000             | 0,56   | 0,39 | 0,81             | 0,002 |

<sup>c</sup> There are no 30-day complications in patients with moderately high severity and undergoing laparotomic cholecystectomy

## SUPPLEMENTARY DATA

### DETAILED METHODS

#### PART 1 - Cohort selection

Source of data: Hospital Information System (HIS)

##### *Inclusion criteria*

All hospital admissions with a primary or secondary contributing diagnosis of *cholelithiasis* (International Classification of Diseases 9th Revision, Clinical Modification - ICD9-CM = 574) and a procedure code of *cholecystectomy* (ICD9-CM 51.22, 51.23), occurred in private and public hospitals of the Lazio Region between January 2007 and September 2008 were included, for a total of 16,432 cases. The final population, after sequential exclusions, consisted of 13,651 subjects.

##### *Exclusion criteria*

- long-term hospitalizations, rehabilitations and day-hospitals
- patients residents outside the Lazio Region
- subjects younger than 18 or older than 100 years old
- hospitalizations for delivery (MDC 14)
- hospitalizations for any type of trauma (ICD-9-CM codes ICD-9-CM 800-897)
- hospitalizations with diagnoses of cancer of the digestive system (ICD-9-CM codes 150-159)
- hospitalizations with other abdominal surgical procedures (selected ICD-9-CM codes)

#### PART 2 - Codes to describe severity of cholelithiasis

##### **1 - Cholelithiasis of the biliary tract without complications**

574.20; 574.50; 574.90

##### **2. Cholelithiasis of the biliary tract with cholecystitis (without obstruction)**

574.10; 574.40; 574.70; 575.1 AND 574.20 or 574.50 or 574.90; 574.00; 574.30; 574.60; 574.80; 575.0 AND 574.20 or 574.50 or 574.90

##### **3. Cholelithiasis of the biliary tract with obstruction (without cholecystitis)**

574.21; 574.51; 574.01; 574.91; 575.2 AND 574.20 or 574.50 or 574.90; 576.2 AND 574.20 or 574.50 or 574.90; 575.3

##### **4. Cholelithiasis of the biliary tract with both obstruction and cholecystitis**

574.01; 574.11; 574.31; 574.41; 574.61; 574.71; 574.81; 575.2 AND 574.00; 575.0 AND 574.20 575.1 AND 574.20 574.30; 575.0 AND 574.50; 575.1 AND 574.50; 574.60; 574.70; 574.80; 576.1; 576.2 AND 574.00; 575.0 AND 574.20; 575.1 AND 574.20; 574.30; 575.0 AND 574.50; 575.1 AND 574.50; 574.60; 574.70; 574.80

#### PART 3 - Codes to describe previous upper abdominal surgery

Codes in the index admission – post procedural states

stomach V44.1, V45.75, V55.1; intestine V44.2, V44.4, V45.3, V45.72, V53.5, V55.2, V55.4, V42.84; liver V42.7; pancreas 42.83

Codes in the previous 2-year- hospitalizations

Stomach

43.5,43.6,43.7,,43.8,43.9,44.31,44.39,44.40,44.41,44.42,44.5,44.61,44.63,44.64,44.65,44.69

Small intestine

45.31,45.32,45.33,45.34,45.50,45.51,45.6,45.9,45.91,45.92,45.93,46.01,46.02,46.60,46.61,  
46.62,46.71,46.72,46.73,46.74,46.80,46.81,46.93,46.97

Liver

50.2,50.3, 50.4,50.5,50.6

Pancreas

52.22,52.3,52.4,52.5,52.6,52.7,52.8,52.95,52.96

Abdominal Hernia

53.4,53.5,53.6,53.7

Peritoneum

54.4,54.5,54.6,54.7

Large intestine

45.41,45.49,45.7,45.8,45.94,46.03,46.04,46.63,46.64,46.75,46.76,46.79

Other surgery

55.4,55.5,56.2,56.4,57.1,57.6,57.7,65.3,65.4,65.5,65.6,66.4,66.5,68.3,68.4,68.6,68.8

**PART 4 - Codes to describe coexisting conditions**

On the basis of previous 2-year hospitalizations (following a validated coding algorithm – enhanced Elixhauser AHRQ-Web-ICD-9-CM - see reference n. 17 cited in the text).

*diabetes 250.xx; hypertension 401-405; obesity 280.0, ischemic disease 410-414, 429.7, previous revascularization V45.81, V45.82, procedures 36.0, 36.1, heart failure 428, other cardiac disease 093.2, 391, 393-398, 420-425, 429, 745, 746.3-646.6, V15.1, V42.2, V43.2, V43.3, V45.0 arrhythmia / conduction disorders 426-427, cerebrovascular disease 430-438, vascular disease 440-448, 557, hematologic disorders 280-285, 286, 287.1, 287.3-287.5, 288, 289, chronic respiratory disease 490-496, 518.81, 518.82, chronic liver disease / pancreas 571, 572, 577.1, 577.9, chronic renal disease 582-583, 585-588, V42.0, V45.1m V56, cancer 140-208.9*

**PART 5 - Codes to describe outcomes**

**A) Surgical-related complications (within 30 day after the surgery)**

in the index or in the subsequent hospitalizations (excluding hospitalizations for trauma ICD-9-CM 800-897) and delivery (MDC 14)

at least one of the following:

*998.1 Hemorrhage or hematoma or seroma complicating a procedure; 998.2 Accidental puncture or laceration during a procedure; 998.3 Disruption of wound; 998.4 Foreign body accidentally left during a procedure; 998.5 Postoperative infection; 998.6 Persistent postoperative fistula; 998.7 Acute reaction to foreign substance accidentally left during a procedure; 998.81 Emphysema (subcutaneous) (surgical) resulting from a procedure; 998.83 Non-healing surgical wound; 998.89 Other specified complications; 997.4 Digestive system complications; 998.9 Unspecified complication of procedure, not elsewhere classified*

1  
2  
3 Only in the subsequent hospitalizations  
4

5 at least one of the following:

6 *567 Peritonitis and retroperitoneal infections; 575.4 Perforation of gallbladder; 575.5 Fistula*  
7 *of gallbladder; 576.0 Postcholecystectomy syndrome; 576.3 Perforation of bile duct; 576.4*  
8 *Fistula of bile duct; 570 Acute and subacute necrosis of liver; 789.0 Abdominal pain*  
9  
10

11  
12  
13 ***B) Systemic complications (within 30 day after the surgery)***  
14

15 in the index or in the subsequent hospitalizations (excluding hospitalizations for trauma ICD-9-CM  
16 800-897) and delivery (MDC 14)  
17

18 at least one of the following:

19 *997.0 Nervous system complications; 997.1 Cardiac complications; 997.3 Respiratory*  
20 *complications; 998.0 Postoperative shock; 410 Acute myocardial infarction; 415.1 Pulmonary*  
21 *embolism and infarction; 431 Intracerebral haemorrhage; 433.x1 Occlusion and stenosis of*  
22 *precerebral arteries with infarction; 434.x1 Occlusion of cerebral arteries with infarction; 436*  
23 *Acute, but ill-defined, cerebrovascular disease; 480-486 Pneumonia; 513.0 Abscess of lung*  
24 *518.4 Acute edema of lung, unspecified; 518.5 Pulmonary insufficiency following trauma and*  
25 *surgery; 785.5 Shock without mention of trauma; 788.2 Retention of urine*  
26  
27  
28

29 Only in the subsequent hospitalizations

30 *038 Septicemia*  
31  
32  
33  
34  
35  
36  
37  
38  
39  
40  
41  
42  
43  
44  
45  
46  
47  
48  
49  
50  
51  
52  
53  
54  
55  
56  
57  
58  
59  
60



1  
2  
3  
4  
5  
6  
7  
8  
9  
10  
11  
12  
13  
14  
15  
16  
17  
18  
19  
20  
21  
22  
23  
24  
25  
26  
27  
28  
29  
30  
31  
32  
33  
34  
35  
36  
37  
38  
39  
40  
41  
42  
43  
44  
45  
46  
47  
48  
49  
50  
51  
52  
53  
54  
55  
56  
57  
58  
59  
60

Figure 1. Selection of the study population

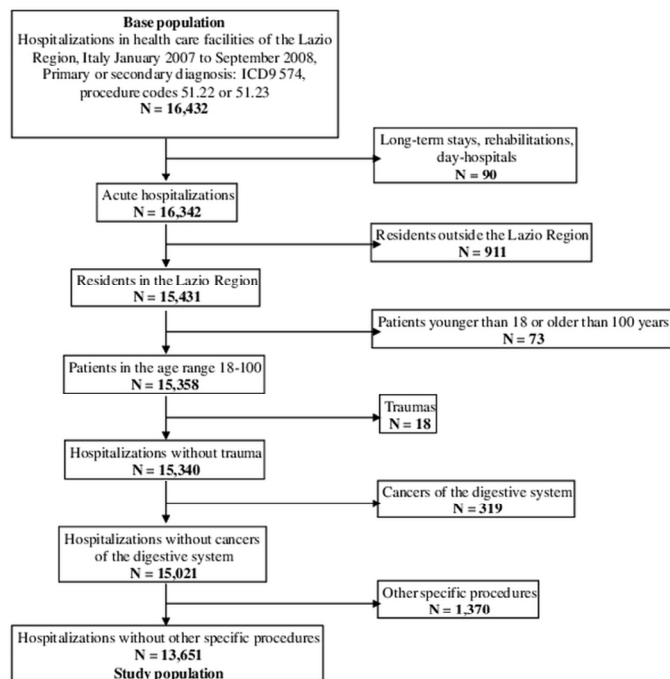

90x116mm (300 x 300 DPI)
